# Supplementary material
Source: publisher figshare collection journal article supplement (https://acs.figshare.com/ndownloader/files/9486052)
Supplement: Supplementary file 1 [file 9486052]

HEADER    TRANSFERASE/TRANSFERASE INHIBITOR       22-JAN-13   4IVB
REMARK   4 4IVB COMPLIES WITH FORMAT V. 3.30,
REMARK 888
REMARK 888 WRITTEN BY MAESTRO (A PRODUCT OF SCHRODINGER, LLC)
TITLE     JAK1 KINASE (JH1 DOMAIN) IN COMPLEX WITH THE INHIBITOR
TITLE    2 TRANS-4-{2-
TITLE    3 [(1R)-1-HYDROXYETHYL]IMIDAZO[4,5-D]PYRROLO[2,3-B]PYRIDIN-1(
TITLE    4 6H)- YL}CYCLOHEXANECARBONITRILE
EXPDTA    X-RAY DIFFRACTION
REMARK   2 RESOLUTION.    1.90 ANGSTROMS
REMARK 200  TEMPERATURE           (KELVIN) : 110.00
REMARK 200  PH                             : 5.50
REMARK 350 BIOMOLECULE:  1
REMARK 350 APPLY THE FOLLOWING TO CHAINS: A
REMARK 350   BIOMT1  1   1.000000 0.000000 0.000000   0.000000
REMARK 350   BIOMT2  1   0.000000 1.000000 0.000000   0.000000
REMARK 350   BIOMT3  1   0.000000 0.000000 1.000000   0.000000
REMARK 350 BIOMOLECULE:  2
REMARK 350 APPLY THE FOLLOWING TO CHAINS: B
REMARK 350   BIOMT1  1   1.000000 0.000000 0.000000   0.000000
REMARK 350   BIOMT2  1   0.000000 1.000000 0.000000   0.000000
REMARK 350   BIOMT3  1   0.000000 0.000000 1.000000   0.000000
CRYST1   42.918  173.479   44.540  90.00  94.29  90.00 P 1 21 1      4
MODEL        1
ATOM      1  N   VAL B 865     142.365  61.579   6.265  1.00 59.19           N  
ANISOU    1  N   VAL B 865     7115   7071   8301    564    651    -65
ATOM      2  CA  VAL B 865     140.975  61.530   6.784  1.00 87.28           C  
ANISOU    2  CA  VAL B 865    10751  10632  11778    487    631    -67
ATOM      3  C   VAL B 865     140.005  62.251   5.796  1.00 82.20           C  
ANISOU    3  C   VAL B 865    10092  10031  11107    469    547    -11
ATOM      4  O   VAL B 865     140.278  63.355   5.310  1.00 71.67           O  
ANISOU    4  O   VAL B 865     8742   8686   9800    514    502     36
ATOM      5  CB  VAL B 865     140.841  62.170   8.200  1.00101.11           C  
ANISOU    5  CB  VAL B 865    12606  12304  13506    476    652    -87
ATOM      6  CG1 VAL B 865     141.411  63.598   8.267  1.00 80.27           C  
ANISOU    6  CG1 VAL B 865     9980   9602  10918    529    623    -50
ATOM      7  CG2 VAL B 865     139.397  62.152   8.741  1.00 84.98           C  
ANISOU    7  CG2 VAL B 865    10631  10275  11382    404    623    -86
ATOM      8  H1  VAL B 865     142.985  61.078   6.891  1.00  0.00           H  
ATOM      9  H2  VAL B 865     142.421  61.090   5.378  1.00  0.00           H  
ATOM     10  N   ASP B 866     138.865  61.606   5.535  1.00 51.37           N  
ANISOU   10  N   ASP B 866     6193   6174   7147    406    531    -18
ATOM     11  CA  ASP B 866     137.784  62.178   4.745  1.00 50.06           C  
ANISOU   11  CA  ASP B 866     6020   6054   6947    381    457     22
ATOM     12  C   ASP B 866     136.709  62.688   5.726  1.00 40.56           C  
ANISOU   12  C   ASP B 866     4911   4815   5683    335    444     26
ATOM     13  O   ASP B 866     136.120  61.865   6.431  1.00 32.02           O  
ANISOU   13  O   ASP B 866     3873   3730   4560    291    475     -6
ATOM     14  CB  ASP B 866     137.226  61.121   3.772  1.00 39.38           C  
ANISOU   14  CB  ASP B 866     4604   4775   5582    343    450      4
ATOM     15  CG  ASP B 866     135.984  61.562   2.997  1.00 43.22           C  
ANISOU   15  CG  ASP B 866     5089   5309   6021    309    380     32
ATOM     16  OD1 ASP B 866     135.655  62.768   2.962  1.00 41.25           O  
ANISOU   16  OD1 ASP B 866     4865   5053   5755    327    331     76
ATOM     17  OD2 ASP B 866     135.345  60.676   2.407  1.00 52.49           O1-
ANISOU   17  OD2 ASP B 866     6240   6526   7178    263    380      9
ATOM     18  H   ASP B 866     138.674  60.721   5.986  1.00  0.00           H  
ATOM     19  N   PRO B 867     136.454  64.014   5.755  1.00 38.08           N  
ANISOU   19  N   PRO B 867     4626   4476   5363    348    400     69
ATOM     20  CA  PRO B 867     135.418  64.585   6.627  1.00 36.94           C  
ANISOU   20  CA  PRO B 867     4562   4303   5169    303    385     70
ATOM     21  C   PRO B 867     133.979  64.175   6.262  1.00 36.88           C  
ANISOU   21  C   PRO B 867     4559   4353   5099    249    351     72
ATOM     22  O   PRO B 867     133.082  64.388   7.076  1.00 35.86           O  
ANISOU   22  O   PRO B 867     4490   4210   4925    211    343     64
ATOM     23  CB  PRO B 867     135.613  66.095   6.469  1.00 48.17           C  
ANISOU   23  CB  PRO B 867     5995   5693   6615    333    349    125
ATOM     24  CG  PRO B 867     136.187  66.269   5.079  1.00 40.19           C  
ANISOU   24  CG  PRO B 867     4903   4731   5634    382    318    165
ATOM     25  CD  PRO B 867     137.042  65.035   4.886  1.00 49.08           C  
ANISOU   25  CD  PRO B 867     5976   5877   6795    404    359    124
ATOM     26  N   THR B 868     133.774  63.617   5.063  1.00 33.46           N  
ANISOU   26  N   THR B 868     4060   3983   4667    248    331     77
ATOM     27  CA  THR B 868     132.474  63.130   4.616  1.00 26.28           C  
ANISOU   27  CA  THR B 868     3151   3123   3710    200    306     70
ATOM     28  C   THR B 868     132.313  61.616   4.828  1.00 23.62           C  
ANISOU   28  C   THR B 868     2814   2793   3367    169    355     27
ATOM     29  O   THR B 868     131.286  61.058   4.440  1.00 26.97           O  
ANISOU   29  O   THR B 868     3234   3250   3763    132    343     19
ATOM     30  CB  THR B 868     132.255  63.438   3.118  1.00 28.51           C  
ANISOU   30  CB  THR B 868     3364   3475   3994    209    253     94
ATOM     31  OG1 THR B 868     133.078  62.692   2.245  1.00 27.36           O  
ANISOU   31  OG1 THR B 868     3140   3360   3893    230    269     74
ATOM     32  CG2 THR B 868     132.425  64.915   2.787  1.00 31.42           C  
ANISOU   32  CG2 THR B 868     3730   3843   4362    244    207    149
ATOM     33  H   THR B 868     134.546  63.482   4.409  1.00  0.00           H  
ATOM     34  HG1 THR B 868     134.016  62.746   2.551  1.00  0.00           H  
ATOM     35  N   HIS B 869     133.307  60.962   5.433  1.00 26.94           N  
ANISOU   35  N   HIS B 869     3238   3181   3816    185    415      0
ATOM     36  CA  HIS B 869     133.209  59.556   5.773  1.00 30.28           C  
ANISOU   36  CA  HIS B 869     3669   3606   4230    156    473    -33
ATOM     37  C   HIS B 869     132.926  59.452   7.267  1.00 26.39           C  
ANISOU   37  C   HIS B 869     3264   3071   3690    144    505    -48
ATOM     38  O   HIS B 869     133.734  59.901   8.082  1.00 29.70           O  
ANISOU   38  O   HIS B 869     3712   3452   4121    170    526    -60
ATOM     39  CB  HIS B 869     134.494  58.826   5.384  1.00 34.95           C  
ANISOU   39  CB  HIS B 869     4194   4203   4880    182    524    -55
ATOM     40  CG  HIS B 869     134.407  57.346   5.630  1.00 47.62           C  
ANISOU   40  CG  HIS B 869     5803   5810   6479    147    593    -85
ATOM     41  ND1 HIS B 869     135.101  56.723   6.644  1.00 56.04           N  
ANISOU   41  ND1 HIS B 869     6904   6846   7542    156    664   -109
ATOM     42  CD2 HIS B 869     133.679  56.362   5.008  1.00 49.55           C  
ANISOU   42  CD2 HIS B 869     6024   6081   6719    102    605    -92
ATOM     43  CE1 HIS B 869     134.791  55.428   6.612  1.00 56.56           C  
ANISOU   43  CE1 HIS B 869     6968   6921   7598    120    721   -122
ATOM     44  NE2 HIS B 869     133.928  55.137   5.638  1.00 75.97           N  
ANISOU   44  NE2 HIS B 869     9392   9409  10061     85    685   -112
ATOM     45  H   HIS B 869     134.133  61.457   5.750  1.00  0.00           H  
ATOM     46  HD1 HIS B 869     135.722  57.184   7.298  1.00  0.00           H  
ATOM     47  N   PHE B 870     131.777  58.869   7.588  1.00 22.41           N  
ANISOU   47  N   PHE B 870     2803   2577   3133    106    506    -50
ATOM     48  CA  PHE B 870     131.332  58.656   8.952  1.00 27.64           C  
ANISOU   48  CA  PHE B 870     3548   3216   3737     94    527    -63
ATOM     49  C   PHE B 870     131.450  57.158   9.220  1.00 29.39           C  
ANISOU   49  C   PHE B 870     3782   3440   3943     80    597    -80
ATOM     50  O   PHE B 870     130.824  56.365   8.512  1.00 29.11           O  
ANISOU   50  O   PHE B 870     3723   3423   3911     55    606    -71
ATOM     51  CB  PHE B 870     129.880  59.147   9.096  1.00 22.26           C  
ANISOU   51  CB  PHE B 870     2905   2549   3003     69    471    -45
ATOM     52  CG  PHE B 870     129.708  60.656   9.048  1.00 23.58           C  
ANISOU   52  CG  PHE B 870     3071   2711   3178     77    413    -27
ATOM     53  CD1 PHE B 870     129.808  61.357   7.830  1.00 19.74           C  
ANISOU   53  CD1 PHE B 870     2526   2246   2726     87    372     -1
ATOM     54  CD2 PHE B 870     129.544  61.390  10.238  1.00 25.10           C  
ANISOU   54  CD2 PHE B 870     3319   2879   3338     74    400    -38
ATOM     55  CE1 PHE B 870     129.711  62.741   7.818  1.00 24.66           C  
ANISOU   55  CE1 PHE B 870     3153   2861   3354     95    326     23
ATOM     56  CE2 PHE B 870     129.437  62.773  10.206  1.00 27.52           C  
ANISOU   56  CE2 PHE B 870     3625   3173   3658     75    355    -20
ATOM     57  CZ  PHE B 870     129.517  63.447   8.996  1.00 22.46           C  
ANISOU   57  CZ  PHE B 870     2930   2549   3052     86    321     15
ATOM     58  H   PHE B 870     131.167  58.501   6.863  1.00  0.00           H  
ATOM     59  N   GLU B 871     132.263  56.776  10.208  1.00 29.54           N  
ANISOU   59  N   GLU B 871     3835   3437   3948     96    653   -106
ATOM     60  CA  GLU B 871     132.404  55.377  10.593  1.00 35.02           C  
ANISOU   60  CA  GLU B 871     4549   4136   4620     84    730   -116
ATOM     61  C   GLU B 871     131.179  54.913  11.381  1.00 33.84           C  
ANISOU   61  C   GLU B 871     4476   3993   4386     63    726   -102
ATOM     62  O   GLU B 871     130.794  55.569  12.351  1.00 30.64           O  
ANISOU   62  O   GLU B 871     4128   3585   3927     69    692   -110
ATOM     63  CB  GLU B 871     133.667  55.154  11.432  1.00 37.49           C  
ANISOU   63  CB  GLU B 871     4875   4431   4939    112    793   -151
ATOM     64  CG  GLU B 871     134.967  55.521  10.700  1.00 47.75           C  
ANISOU   64  CG  GLU B 871     6096   5722   6324    144    805   -165
ATOM     65  CD  GLU B 871     136.192  54.966  11.422  1.00 76.06           C  
ANISOU   65  CD  GLU B 871     9686   9294   9918    170    888   -203
ATOM     66  OE1 GLU B 871     136.265  53.732  11.605  1.00 74.83           O  
ANISOU   66  OE1 GLU B 871     9534   9154   9744    154    960   -209
ATOM     67  OE2 GLU B 871     137.073  55.764  11.796  1.00 75.14           O1-
ANISOU   67  OE2 GLU B 871     9570   9148   9830    207    885   -228
ATOM     68  H   GLU B 871     132.740  57.473  10.778  1.00  0.00           H  
ATOM     69  N   LYS B 872     130.622  53.757  11.002  1.00 26.47           N  
ANISOU   69  N   LYS B 872     3543   3068   3445     39    762    -83
ATOM     70  CA  LYS B 872     129.439  53.202  11.655  1.00 33.46           C  
ANISOU   70  CA  LYS B 872     4499   3958   4256     28    761    -60
ATOM     71  C   LYS B 872     129.614  53.064  13.175  1.00 31.90           C  
ANISOU   71  C   LYS B 872     4377   3765   3979     48    786    -76
ATOM     72  O   LYS B 872     128.681  53.362  13.920  1.00 29.81           O  
ANISOU   72  O   LYS B 872     4168   3512   3645     51    744    -68
ATOM     73  CB  LYS B 872     129.079  51.835  11.048  1.00 39.39           C  
ANISOU   73  CB  LYS B 872     5242   4702   5020      2    821    -36
ATOM     74  CG  LYS B 872     127.746  51.296  11.592  1.00 46.89           C  
ANISOU   74  CG  LYS B 872     6264   5651   5899     -2    815     -1
ATOM     75  CD  LYS B 872     127.407  49.899  11.085  1.00 73.18           C  
ANISOU   75  CD  LYS B 872     9596   8959   9247    -27    885     27
ATOM     76  CE  LYS B 872     126.103  49.398  11.721  1.00 79.22           C  
ANISOU   76  CE  LYS B 872    10440   9718   9938    -20    879     69
ATOM     77  NZ  LYS B 872     125.832  47.992  11.387  1.00 82.50           N1+
ANISOU   77  NZ  LYS B 872    10874  10102  10369    -42    961    105
ATOM     78  H   LYS B 872     130.996  53.253  10.211  1.00  0.00           H  
ATOM     79  HZ1 LYS B 872     124.973  47.699  11.822  1.00  0.00           H  
ATOM     80  HZ2 LYS B 872     125.744  47.872  10.394  1.00  0.00           H  
ATOM     81  HZ3 LYS B 872     126.572  47.401  11.723  1.00  0.00           H  
ATOM     82  N   ARG B 873     130.813  52.653  13.611  1.00 31.80           N  
ANISOU   82  N   ARG B 873     4362   3747   3973     62    853   -103
ATOM     83  CA  ARG B 873     131.074  52.388  15.023  1.00 44.81           C  
ANISOU   83  CA  ARG B 873     6082   5406   5535     80    886   -125
ATOM     84  C   ARG B 873     130.920  53.621  15.932  1.00 35.78           C  
ANISOU   84  C   ARG B 873     4972   4265   4356     92    818   -157
ATOM     85  O   ARG B 873     130.721  53.435  17.131  1.00 37.90           O  
ANISOU   85  O   ARG B 873     5305   4554   4539    103    824   -176
ATOM     86  CB  ARG B 873     132.443  51.719  15.216  1.00 47.15           C  
ANISOU   86  CB  ARG B 873     6365   5698   5850     94    977   -155
ATOM     87  CG  ARG B 873     133.653  52.609  14.902  1.00 45.04           C  
ANISOU   87  CG  ARG B 873     6042   5410   5661    114    970   -196
ATOM     88  CD  ARG B 873     134.954  51.892  15.246  1.00 58.19           C  
ANISOU   88  CD  ARG B 873     7696   7075   7337    133   1065   -231
ATOM     89  NE  ARG B 873     136.120  52.667  14.812  1.00 52.19           N  
ANISOU   89  NE  ARG B 873     6871   6291   6668    159   1063   -263
ATOM     90  CZ  ARG B 873     137.289  52.763  15.457  1.00 77.00           C  
ANISOU   90  CZ  ARG B 873    10017   9420   9819    191   1113   -314
ATOM     91  NH1 ARG B 873     137.479  52.173  16.638  1.00 69.14           N  
ANISOU   91  NH1 ARG B 873     9089   8440   8739    198   1169   -346
ATOM     92  NH2 ARG B 873     138.275  53.464  14.911  1.00 70.47           N1+
ANISOU   92  NH2 ARG B 873     9126   8565   9082    220   1107   -334
ATOM     93  H   ARG B 873     131.558  52.498  12.945  1.00  0.00           H  
ATOM     94  HE  ARG B 873     136.028  53.103  13.893  1.00  0.00           H  
ATOM     95 HH12 ARG B 873     138.352  52.243  17.139  1.00  0.00           H  
ATOM     96 HH11 ARG B 873     136.745  51.642  17.082  1.00  0.00           H  
ATOM     97 HH22 ARG B 873     139.172  53.565  15.362  1.00  0.00           H  
ATOM     98 HH21 ARG B 873     138.156  53.926  14.017  1.00  0.00           H  
ATOM     99  N   PHE B 874     130.996  54.834  15.369  1.00 30.02           N  
ANISOU   99  N   PHE B 874     4199   3518   3689     91    757   -164
ATOM    100  CA  PHE B 874     130.859  56.070  16.140  1.00 30.66           C  
ANISOU  100  CA  PHE B 874     4306   3592   3749     94    698   -194
ATOM    101  C   PHE B 874     129.500  56.748  15.966  1.00 31.45           C  
ANISOU  101  C   PHE B 874     4411   3708   3829     77    618   -167
ATOM    102  O   PHE B 874     129.270  57.777  16.600  1.00 31.49           O  
ANISOU  102  O   PHE B 874     4433   3710   3819     72    567   -190
ATOM    103  CB  PHE B 874     131.978  57.048  15.764  1.00 32.99           C  
ANISOU  103  CB  PHE B 874     4556   3848   4127    108    693   -219
ATOM    104  CG  PHE B 874     133.368  56.513  16.021  1.00 36.30           C  
ANISOU  104  CG  PHE B 874     4968   4250   4571    133    770   -256
ATOM    105  CD1 PHE B 874     133.690  55.907  17.253  1.00 39.12           C  
ANISOU  105  CD1 PHE B 874     5384   4621   4858    141    818   -297
ATOM    106  CD2 PHE B 874     134.384  56.721  15.070  1.00 39.87           C  
ANISOU  106  CD2 PHE B 874     5353   4679   5116    152    791   -253
ATOM    107  CE1 PHE B 874     134.984  55.475  17.494  1.00 48.54           C  
ANISOU  107  CE1 PHE B 874     6568   5799   6074    166    894   -336
ATOM    108  CE2 PHE B 874     135.672  56.282  15.329  1.00 48.69           C  
ANISOU  108  CE2 PHE B 874     6456   5780   6262    179    863   -290
ATOM    109  CZ  PHE B 874     135.971  55.661  16.535  1.00 44.58           C  
ANISOU  109  CZ  PHE B 874     5995   5270   5672    185    918   -333
ATOM    110  H   PHE B 874     131.135  54.925  14.367  1.00  0.00           H  
ATOM    111  N   LEU B 875     128.637  56.190  15.115  1.00 27.98           N  
ANISOU  111  N   LEU B 875     3954   3281   3392     65    610   -122
ATOM    112  CA  LEU B 875     127.352  56.776  14.763  1.00 33.26           C  
ANISOU  112  CA  LEU B 875     4618   3966   4051     51    539    -96
ATOM    113  C   LEU B 875     126.281  56.172  15.677  1.00 32.58           C  
ANISOU  113  C   LEU B 875     4593   3910   3874     56    530    -84
ATOM    114  O   LEU B 875     125.893  55.019  15.480  1.00 37.10           O  
ANISOU  114  O   LEU B 875     5184   4487   4424     58    568    -53
ATOM    115  CB  LEU B 875     127.099  56.483  13.268  1.00 32.57           C  
ANISOU  115  CB  LEU B 875     4475   3874   4024     39    537    -62
ATOM    116  CG  LEU B 875     126.054  57.360  12.555  1.00 34.31           C  
ANISOU  116  CG  LEU B 875     4666   4107   4261     27    467    -42
ATOM    117  CD1 LEU B 875     126.380  58.857  12.634  1.00 24.35           C  
ANISOU  117  CD1 LEU B 875     3386   2840   3026     28    420    -56
ATOM    118  CD2 LEU B 875     125.962  56.911  11.092  1.00 29.33           C  
ANISOU  118  CD2 LEU B 875     3979   3476   3687     15    478    -23
ATOM    119  H   LEU B 875     128.860  55.298  14.687  1.00  0.00           H  
ATOM    120  N   LYS B 876     125.873  56.922  16.704  1.00 33.40           N  
ANISOU  120  N   LYS B 876     4728   4034   3929     57    482   -110
ATOM    121  CA  LYS B 876     124.983  56.421  17.746  1.00 39.27           C  
ANISOU  121  CA  LYS B 876     5527   4816   4575     70    467   -105
ATOM    122  C   LYS B 876     123.573  56.946  17.562  1.00 34.65           C  
ANISOU  122  C   LYS B 876     4934   4256   3975     66    397    -81
ATOM    123  O   LYS B 876     123.372  58.155  17.640  1.00 27.63           O  
ANISOU  123  O   LYS B 876     4019   3371   3109     51    342   -102
ATOM    124  CB  LYS B 876     125.530  56.787  19.137  1.00 40.58           C  
ANISOU  124  CB  LYS B 876     5732   5000   4684     77    462   -162
ATOM    125  CG  LYS B 876     126.896  56.150  19.442  1.00 66.61           C  
ANISOU  125  CG  LYS B 876     9045   8280   7982     87    539   -192
ATOM    126  CD  LYS B 876     126.912  54.621  19.260  1.00 83.22           C  
ANISOU  126  CD  LYS B 876    11176  10393  10050    102    609   -150
ATOM    127  CE  LYS B 876     128.314  54.021  19.348  1.00 86.87           C  
ANISOU  127  CE  LYS B 876    11638  10837  10532    110    694   -176
ATOM    128  NZ  LYS B 876     128.302  52.587  19.008  1.00 72.40           N1+
ANISOU  128  NZ  LYS B 876     9822   9006   8678    116    770   -129
ATOM    129  H   LYS B 876     126.203  57.882  16.800  1.00  0.00           H  
ATOM    130  HZ1 LYS B 876     128.352  52.459  18.011  1.00  0.00           H  
ATOM    131  HZ2 LYS B 876     129.097  52.130  19.421  1.00  0.00           H  
ATOM    132  HZ3 LYS B 876     127.466  52.146  19.350  1.00  0.00           H  
ATOM    133  N   ARG B 877     122.633  56.020  17.347  1.00 29.62           N  
ANISOU  133  N   ARG B 877     4318   3631   3301     81    405    -37
ATOM    134  CA  ARG B 877     121.226  56.328  17.154  1.00 33.90           C  
ANISOU  134  CA  ARG B 877     4851   4194   3832     85    348    -11
ATOM    135  C   ARG B 877     120.615  56.883  18.439  1.00 32.12           C  
ANISOU  135  C   ARG B 877     4651   4020   3533     97    290    -36
ATOM    136  O   ARG B 877     120.750  56.259  19.493  1.00 29.24           O  
ANISOU  136  O   ARG B 877     4336   3684   3089    120    303    -45
ATOM    137  CB  ARG B 877     120.461  55.077  16.684  1.00 32.32           C  
ANISOU  137  CB  ARG B 877     4675   3984   3618    102    381     42
ATOM    138  CG  ARG B 877     118.942  55.318  16.590  1.00 42.71           C  
ANISOU  138  CG  ARG B 877     5988   5323   4914    118    323     65
ATOM    139  CD  ARG B 877     118.150  54.060  16.260  1.00 48.91           C  
ANISOU  139  CD  ARG B 877     6807   6089   5687    141    358    120
ATOM    140  NE  ARG B 877     116.711  54.347  16.202  1.00 49.53           N  
ANISOU  140  NE  ARG B 877     6879   6187   5751    163    303    139
ATOM    141  CZ  ARG B 877     115.872  54.421  17.241  1.00 52.30           C  
ANISOU  141  CZ  ARG B 877     7261   6586   6025    201    259    148
ATOM    142  NH1 ARG B 877     116.315  54.230  18.483  1.00 52.94           N  
ANISOU  142  NH1 ARG B 877     7383   6705   6026    219    259    136
ATOM    143  NH2 ARG B 877     114.584  54.687  17.052  1.00 55.23           N1+
ANISOU  143  NH2 ARG B 877     7618   6972   6394    224    213    165
ATOM    144  H   ARG B 877     122.883  55.043  17.389  1.00  0.00           H  
ATOM    145  HE  ARG B 877     116.379  54.460  15.228  1.00  0.00           H  
ATOM    146 HH12 ARG B 877     115.699  54.255  19.281  1.00  0.00           H  
ATOM    147 HH11 ARG B 877     117.283  54.021  18.664  1.00  0.00           H  
ATOM    148 HH22 ARG B 877     113.928  54.693  17.817  1.00  0.00           H  
ATOM    149 HH21 ARG B 877     114.171  54.871  16.116  1.00  0.00           H  
ATOM    150  N   ILE B 878     119.887  57.987  18.297  1.00 25.84           N  
ANISOU  150  N   ILE B 878     3818   3240   2760     83    226    -48
ATOM    151  CA  ILE B 878     119.142  58.572  19.392  1.00 25.51           C  
ANISOU  151  CA  ILE B 878     3784   3251   2656     90    165    -75
ATOM    152  C   ILE B 878     117.638  58.284  19.241  1.00 33.32           C  
ANISOU  152  C   ILE B 878     4769   4272   3616    116    126    -36
ATOM    153  O   ILE B 878     117.035  57.774  20.185  1.00 24.09           O  
ANISOU  153  O   ILE B 878     3638   3148   2367    152    108    -27
ATOM    154  CB  ILE B 878     119.428  60.087  19.524  1.00 27.01           C  
ANISOU  154  CB  ILE B 878     3932   3438   2890     52    126   -122
ATOM    155  CG1 ILE B 878     120.952  60.300  19.683  1.00 33.01           C  
ANISOU  155  CG1 ILE B 878     4700   4156   3685     34    168   -159
ATOM    156  CG2 ILE B 878     118.666  60.700  20.708  1.00 26.94           C  
ANISOU  156  CG2 ILE B 878     3923   3487   2822     52     64   -160
ATOM    157  CD1 ILE B 878     121.372  61.749  19.923  1.00 40.76           C  
ANISOU  157  CD1 ILE B 878     5651   5120   4714     -1    139   -204
ATOM    158  H   ILE B 878     119.836  58.468  17.397  1.00  0.00           H  
ATOM    159  N   ARG B 879     117.050  58.548  18.073  1.00 19.82           N  
ANISOU  159  N   ARG B 879     3017   2544   1968    104    113    -14
ATOM    160  CA  ARG B 879     115.627  58.317  17.839  1.00 22.21           C  
ANISOU  160  CA  ARG B 879     3311   2871   2253    131     79     16
ATOM    161  C   ARG B 879     115.332  58.405  16.344  1.00 26.31           C  
ANISOU  161  C   ARG B 879     3790   3358   2845    117     87     38
ATOM    162  O   ARG B 879     116.130  58.968  15.595  1.00 19.96           O  
ANISOU  162  O   ARG B 879     2953   2526   2101     83    101     25
ATOM    163  CB  ARG B 879     114.762  59.340  18.625  1.00 27.18           C  
ANISOU  163  CB  ARG B 879     3917   3563   2847    133      8    -13
ATOM    164  CG  ARG B 879     115.020  60.825  18.294  1.00 27.09           C  
ANISOU  164  CG  ARG B 879     3851   3551   2890     85    -19    -51
ATOM    165  CD  ARG B 879     114.101  61.750  19.101  1.00 35.32           C  
ANISOU  165  CD  ARG B 879     4867   4655   3895     81    -82    -87
ATOM    166  NE  ARG B 879     114.190  63.150  18.672  1.00 30.27           N  
ANISOU  166  NE  ARG B 879     4184   4007   3309     29    -98   -123
ATOM    167  CZ  ARG B 879     113.552  63.714  17.637  1.00 39.79           C  
ANISOU  167  CZ  ARG B 879     5338   5213   4566      7   -112   -112
ATOM    168  NH1 ARG B 879     112.786  63.001  16.810  1.00 33.83           N  
ANISOU  168  NH1 ARG B 879     4566   4469   3815     33   -118    -76
ATOM    169  NH2 ARG B 879     113.674  65.020  17.428  1.00 40.93           N1+
ANISOU  169  NH2 ARG B 879     5451   5343   4756    -41   -118   -139
ATOM    170  H   ARG B 879     117.574  58.903  17.280  1.00  0.00           H  
ATOM    171  HE  ARG B 879     114.790  63.728  19.249  1.00  0.00           H  
ATOM    172 HH12 ARG B 879     112.281  63.466  16.070  1.00  0.00           H  
ATOM    173 HH11 ARG B 879     112.726  61.989  16.830  1.00  0.00           H  
ATOM    174 HH22 ARG B 879     113.156  65.475  16.658  1.00  0.00           H  
ATOM    175 HH21 ARG B 879     114.229  65.626  18.012  1.00  0.00           H  
ATOM    176  N   ASP B 880     114.142  57.932  15.965  1.00 20.81           N  
ANISOU  176  N   ASP B 880     3098   2668   2141    147     77     69
ATOM    177  CA  ASP B 880     113.509  58.221  14.678  1.00 26.74           C  
ANISOU  177  CA  ASP B 880     3811   3396   2952    137     80     81
ATOM    178  C   ASP B 880     113.210  59.728  14.593  1.00 31.97           C  
ANISOU  178  C   ASP B 880     4416   4093   3635    115     28     55
ATOM    179  O   ASP B 880     112.654  60.288  15.545  1.00 21.47           O  
ANISOU  179  O   ASP B 880     3076   2812   2268    123    -17     38
ATOM    180  CB  ASP B 880     112.183  57.452  14.412  1.00 26.49           C  
ANISOU  180  CB  ASP B 880     3803   3353   2906    180     86    117
ATOM    181  CG  ASP B 880     112.164  55.947  14.670  1.00 41.81           C  
ANISOU  181  CG  ASP B 880     5801   5249   4834    199    148    153
ATOM    182  OD1 ASP B 880     113.232  55.323  14.855  1.00 40.98           O  
ANISOU  182  OD1 ASP B 880     5701   5111   4758    169    195    147
ATOM    183  OD2 ASP B 880     111.062  55.369  14.595  1.00 50.07           O1-
ANISOU  183  OD2 ASP B 880     6887   6294   5842    246    151    190
ATOM    184  H   ASP B 880     113.562  57.462  16.642  1.00  0.00           H  
ATOM    185  N   LEU B 881     113.546  60.344  13.458  1.00 22.88           N  
ANISOU  185  N   LEU B 881     3226   2923   2543     86     38     50
ATOM    186  CA  LEU B 881     113.048  61.666  13.086  1.00 18.37           C  
ANISOU  186  CA  LEU B 881     2602   2385   1992     65      0     35
ATOM    187  C   LEU B 881     111.705  61.489  12.361  1.00 23.36           C  
ANISOU  187  C   LEU B 881     3209   3025   2642     80     -7     43
ATOM    188  O   LEU B 881     110.726  62.136  12.731  1.00 24.08           O  
ANISOU  188  O   LEU B 881     3263   3157   2727     81    -42     33
ATOM    189  CB  LEU B 881     114.089  62.419  12.226  1.00 17.50           C  
ANISOU  189  CB  LEU B 881     2465   2257   1927     26     11     26
ATOM    190  CG  LEU B 881     115.304  62.938  13.026  1.00 19.46           C  
ANISOU  190  CG  LEU B 881     2728   2497   2166      9     12      8
ATOM    191  CD1 LEU B 881     116.429  63.429  12.091  1.00 21.56           C  
ANISOU  191  CD1 LEU B 881     2972   2734   2483    -18     31      8
ATOM    192  CD2 LEU B 881     114.899  64.018  14.051  1.00 20.99           C  
ANISOU  192  CD2 LEU B 881     2909   2733   2330      1    -31    -13
ATOM    193  H   LEU B 881     113.977  59.809  12.706  1.00  0.00           H  
ATOM    194  N   GLY B 882     111.648  60.542  11.418  1.00 24.30           N  
ANISOU  194  N   GLY B 882     3343   3102   2786     89     29     56
ATOM    195  CA  GLY B 882     110.406  60.139  10.781  1.00 24.64           C  
ANISOU  195  CA  GLY B 882     3366   3143   2851    101     28     54
ATOM    196  C   GLY B 882     110.715  58.959   9.861  1.00 33.20           C  
ANISOU  196  C   GLY B 882     4469   4171   3972    100     76     61
ATOM    197  O   GLY B 882     111.846  58.792   9.395  1.00 29.46           O  
ANISOU  197  O   GLY B 882     4014   3665   3511     83    112     67
ATOM    198  H   GLY B 882     112.478  60.026  11.145  1.00  0.00           H  
ATOM    199  N   GLU B 883     109.694  58.143   9.586  0.50 38.09           N  
ANISOU  199  N   GLU B 883     5069   4784   4616    108     77     49
ATOM    200  CA  GLU B 883     109.737  57.107   8.561  0.50 47.85           C  
ANISOU  200  CA  GLU B 883     6321   5963   5894    108    120     48
ATOM    201  C   GLU B 883     109.395  57.763   7.208  0.50 41.46           C  
ANISOU  201  C   GLU B 883     5460   5167   5123     83    113      9
ATOM    202  O   GLU B 883     108.481  58.587   7.151  0.50 45.54           O  
ANISOU  202  O   GLU B 883     5940   5739   5625     83     75     -6
ATOM    203  CB  GLU B 883     108.741  55.989   8.932  0.50 54.75           C  
ANISOU  203  CB  GLU B 883     7235   6813   6752    159    126     71
ATOM    204  CG  GLU B 883     108.964  54.695   8.127  0.50 74.25           C  
ANISOU  204  CG  GLU B 883     9716   9220   9273    164    166     62
ATOM    205  CD  GLU B 883     107.869  53.655   8.326  0.50 85.04           C  
ANISOU  205  CD  GLU B 883    11132  10554  10625    223    175     97
ATOM    206  OE1 GLU B 883     107.492  53.023   7.317  0.50 65.80           O  
ANISOU  206  OE1 GLU B 883     8700   8068   8232    237    199     86
ATOM    207  OE2 GLU B 883     107.415  53.463   9.471  0.50 93.78           O1-
ANISOU  207  OE2 GLU B 883    12270  11683  11676    260    157    135
ATOM    208  H   GLU B 883     108.779  58.354   9.955  0.50  0.00           H  
ATOM    209  N   GLY B 884     110.120  57.388   6.153  0.50 48.55           N  
ANISOU  209  N   GLY B 884     6355   6021   6070     61    152     -7
ATOM    210  CA  GLY B 884     109.857  57.807   4.782  0.50 53.93           C  
ANISOU  210  CA  GLY B 884     6989   6716   6784     38    145    -53
ATOM    211  C   GLY B 884     109.099  56.678   4.071  0.50 78.00           C  
ANISOU  211  C   GLY B 884    10057   9703   9876     46    181    -72
ATOM    212  O   GLY B 884     108.433  55.851   4.699  0.50107.73           O  
ANISOU  212  O   GLY B 884    13873  13419  13638     79    205    -40
ATOM    213  H   GLY B 884     110.786  56.626   6.238  0.50  0.00           H  
ATOM    214  N   HIS B 885     109.193  56.655   2.738  0.50 85.01           N  
ANISOU  214  N   HIS B 885    10905  10593  10802     18    186   -125
ATOM    215  CA  HIS B 885     108.572  55.661   1.861  0.50 90.44           C  
ANISOU  215  CA  HIS B 885    11609  11209  11543     15    227   -153
ATOM    216  C   HIS B 885     109.272  54.297   2.034  0.50100.24           C  
ANISOU  216  C   HIS B 885    12872  12387  12825    -13    280   -136
ATOM    217  O   HIS B 885     108.727  53.405   2.689  0.50125.73           O  
ANISOU  217  O   HIS B 885    16136  15533  16101    -14    332   -135
ATOM    218  CB  HIS B 885     108.548  56.160   0.387  0.50 93.85           C  
ANISOU  218  CB  HIS B 885    11986  11668  12001    -12    215   -227
ATOM    219  CG  HIS B 885     108.397  57.648   0.183  0.50 86.17           C  
ANISOU  219  CG  HIS B 885    10974  10787  10976      1    160   -243
ATOM    220  ND1 HIS B 885     109.465  58.522   0.426  0.50 82.07           N  
ANISOU  220  ND1 HIS B 885    10417  10304  10462     -6    145   -305
ATOM    221  CD2 HIS B 885     107.301  58.386  -0.214  0.50 83.65           C  
ANISOU  221  CD2 HIS B 885    10650  10532  10599     21    121   -203
ATOM    222  CE1 HIS B 885     108.985  59.734   0.170  0.50 76.02           C  
ANISOU  222  CE1 HIS B 885     9623   9623   9638      9    102   -299
ATOM    223  NE2 HIS B 885     107.707  59.715  -0.205  0.50 82.02           N  
ANISOU  223  NE2 HIS B 885    10402  10396  10365     23     88   -236
ATOM    224  H   HIS B 885     109.696  57.396   2.262  0.50  0.00           H  
ATOM    225  HE2 HIS B 885     107.164  60.544  -0.435  1.00  0.00           H  
ATOM    226  N   PHE B 886     110.495  54.185   1.500  0.50 66.40           N  
ANISOU  226  N   PHE B 886     8568   8133   8526    -36    275   -122
ATOM    227  CA  PHE B 886     111.311  52.962   1.506  0.50 66.27           C  
ANISOU  227  CA  PHE B 886     8561   8061   8555    -68    331   -115
ATOM    228  C   PHE B 886     112.540  53.088   2.428  0.50 86.98           C  
ANISOU  228  C   PHE B 886    11227  10664  11155    -59    363    -58
ATOM    229  O   PHE B 886     113.325  52.144   2.538  0.50 96.27           O  
ANISOU  229  O   PHE B 886    12430  11775  12373    -78    427    -46
ATOM    230  CB  PHE B 886     111.737  52.620   0.062  0.50 98.45           C  
ANISOU  230  CB  PHE B 886    12573  12145  12687   -121    339   -179
ATOM    231  CG  PHE B 886     110.575  52.403  -0.894  0.50122.07           C  
ANISOU  231  CG  PHE B 886    15557  15099  15724   -132    352   -233
ATOM    232  CD1 PHE B 886     109.822  51.212  -0.834  0.50122.70           C  
ANISOU  232  CD1 PHE B 886    15679  15079  15862   -142    418   -229
ATOM    233  CD2 PHE B 886     110.142  53.447  -1.740  0.50122.96           C  
ANISOU  233  CD2 PHE B 886    15628  15271  15818   -129    302   -284
ATOM    234  CE1 PHE B 886     108.708  51.052  -1.648  0.50124.94           C  
ANISOU  234  CE1 PHE B 886    15960  15316  16194   -151    434   -283
ATOM    235  CE2 PHE B 886     109.025  53.268  -2.545  0.50124.62           C  
ANISOU  235  CE2 PHE B 886    15834  15445  16070   -137    316   -342
ATOM    236  CZ  PHE B 886     108.317  52.073  -2.506  0.50124.91           C  
ANISOU  236  CZ  PHE B 886    15912  15375  16173   -149    382   -344
ATOM    237  H   PHE B 886     110.863  54.967   0.979  0.50  0.00           H  
ATOM    238  N   GLY B 887     112.684  54.237   3.096  1.00 62.64           N  
ANISOU  238  N   GLY B 887     8158   7629   8013    -35    330    -24
ATOM    239  CA  GLY B 887     113.733  54.495   4.071  1.00 45.84           C  
ANISOU  239  CA  GLY B 887     6003   5555   5857    -42    301    -19
ATOM    240  C   GLY B 887     113.111  55.110   5.324  1.00 44.88           C  
ANISOU  240  C   GLY B 887     5921   5461   5669     -3    269     17
ATOM    241  O   GLY B 887     111.905  55.355   5.386  1.00 33.31           O  
ANISOU  241  O   GLY B 887     4468   4009   4179     24    240     21
ATOM    242  H   GLY B 887     111.948  54.927   3.040  1.00  0.00           H  
ATOM    243  N   LYS B 888     113.947  55.372   6.325  1.00 31.48           N  
ANISOU  243  N   LYS B 888     4241   3772   3944     -1    276     39
ATOM    244  CA  LYS B 888     113.612  56.133   7.523  1.00 27.49           C  
ANISOU  244  CA  LYS B 888     3766   3302   3378     28    240     60
ATOM    245  C   LYS B 888     114.782  57.080   7.813  1.00 23.15           C  
ANISOU  245  C   LYS B 888     3196   2784   2816     15    221     54
ATOM    246  O   LYS B 888     115.911  56.790   7.405  1.00 19.14           O  
ANISOU  246  O   LYS B 888     2672   2262   2338     -5    250     47
ATOM    247  CB  LYS B 888     113.293  55.178   8.703  1.00 29.08           C  
ANISOU  247  CB  LYS B 888     4035   3475   3539     60    269     97
ATOM    248  CG  LYS B 888     114.484  54.344   9.234  1.00 41.42           C  
ANISOU  248  CG  LYS B 888     5630   5013   5094     53    321    114
ATOM    249  CD  LYS B 888     114.183  53.491  10.483  1.00 54.23           C  
ANISOU  249  CD  LYS B 888     7324   6620   6660     92    345    157
ATOM    250  CE  LYS B 888     113.621  54.294  11.675  1.00 66.64           C  
ANISOU  250  CE  LYS B 888     8911   8243   8165    131    282    163
ATOM    251  NZ  LYS B 888     113.958  53.692  12.974  1.00 68.66           N1+
ANISOU  251  NZ  LYS B 888     9232   8504   8348    172    295    201
ATOM    252  H   LYS B 888     114.942  55.194   6.201  1.00  0.00           H  
ATOM    253  HZ1 LYS B 888     113.566  54.276  13.730  1.00  0.00           H  
ATOM    254  HZ2 LYS B 888     113.636  52.749  13.082  1.00  0.00           H  
ATOM    255  HZ3 LYS B 888     114.976  53.752  13.137  1.00  0.00           H  
ATOM    256  N   VAL B 889     114.491  58.176   8.514  1.00 16.73           N  
ANISOU  256  N   VAL B 889     2382   2010   1961     27    175     56
ATOM    257  CA  VAL B 889     115.479  59.141   8.970  1.00 14.96           C  
ANISOU  257  CA  VAL B 889     2145   1807   1731     14    157     49
ATOM    258  C   VAL B 889     115.539  59.035  10.503  1.00 17.16           C  
ANISOU  258  C   VAL B 889     2469   2093   1956     33    151     57
ATOM    259  O   VAL B 889     114.494  59.055  11.162  1.00 18.39           O  
ANISOU  259  O   VAL B 889     2641   2273   2073     54    122     62
ATOM    260  CB  VAL B 889     115.091  60.597   8.586  1.00 13.03           C  
ANISOU  260  CB  VAL B 889     1855   1603   1493      2    111     39
ATOM    261  CG1 VAL B 889     116.221  61.598   8.897  1.00 13.55           C  
ANISOU  261  CG1 VAL B 889     1910   1675   1563    -11    101     38
ATOM    262  CG2 VAL B 889     114.711  60.715   7.100  1.00 15.16           C  
ANISOU  262  CG2 VAL B 889     2079   1878   1802    -11    113     27
ATOM    263  H   VAL B 889     113.544  58.342   8.854  1.00  0.00           H  
ATOM    264  N   GLU B 890     116.754  58.907  11.036  1.00 19.29           N  
ANISOU  264  N   GLU B 890     2755   2347   2225     26    177     52
ATOM    265  CA  GLU B 890     117.041  58.816  12.458  1.00 22.76           C  
ANISOU  265  CA  GLU B 890     3238   2799   2611     40    174     47
ATOM    266  C   GLU B 890     118.009  59.935  12.846  1.00 21.47           C  
ANISOU  266  C   GLU B 890     3058   2641   2458     21    157     22
ATOM    267  O   GLU B 890     118.936  60.245  12.097  1.00 16.84           O  
ANISOU  267  O   GLU B 890     2442   2035   1921      5    172     19
ATOM    268  CB  GLU B 890     117.643  57.434  12.784  1.00 24.52           C  
ANISOU  268  CB  GLU B 890     3506   2993   2816     52    232     59
ATOM    269  CG  GLU B 890     116.719  56.267  12.391  1.00 28.19           C  
ANISOU  269  CG  GLU B 890     3997   3438   3273     71    259     90
ATOM    270  CD  GLU B 890     117.228  54.913  12.859  1.00 43.44           C  
ANISOU  270  CD  GLU B 890     5974   5339   5190     79    327    110
ATOM    271  OE1 GLU B 890     118.391  54.563  12.578  1.00 52.17           O  
ANISOU  271  OE1 GLU B 890     7066   6428   6327     59    366     95
ATOM    272  OE2 GLU B 890     116.424  54.206  13.505  1.00 53.61           O1-
ANISOU  272  OE2 GLU B 890     7312   6621   6436    108    344    143
ATOM    273  H   GLU B 890     117.576  58.902  10.431  1.00  0.00           H  
ATOM    274  N   LEU B 891     117.799  60.495  14.037  1.00 16.33           N  
ANISOU  274  N   LEU B 891     2426   2015   1761     24    127      5
ATOM    275  CA  LEU B 891     118.744  61.368  14.713  1.00 19.25           C  
ANISOU  275  CA  LEU B 891     2795   2378   2140      6    122    -24
ATOM    276  C   LEU B 891     119.839  60.476  15.308  1.00 22.47           C  
ANISOU  276  C   LEU B 891     3242   2762   2532     16    171    -37
ATOM    277  O   LEU B 891     119.514  59.527  16.029  1.00 22.62           O  
ANISOU  277  O   LEU B 891     3304   2796   2491     38    184    -34
ATOM    278  CB  LEU B 891     117.995  62.180  15.798  1.00 17.01           C  
ANISOU  278  CB  LEU B 891     2513   2133   1814      0     73    -50
ATOM    279  CG  LEU B 891     118.877  63.002  16.768  1.00 20.78           C  
ANISOU  279  CG  LEU B 891     2995   2597   2300    -23     70    -92
ATOM    280  CD1 LEU B 891     119.798  63.999  16.038  1.00 24.52           C  
ANISOU  280  CD1 LEU B 891     3432   3035   2847    -49     75    -85
ATOM    281  CD2 LEU B 891     118.014  63.672  17.858  1.00 24.26           C  
ANISOU  281  CD2 LEU B 891     3434   3085   2696    -32     20   -125
ATOM    282  H   LEU B 891     117.087  60.076  14.634  1.00  0.00           H  
ATOM    283  N   CYS B 892     121.098  60.792  15.006  1.00 19.98           N  
ANISOU  283  N   CYS B 892     2911   2412   2266      4    200    -48
ATOM    284  CA  CYS B 892     122.263  60.122  15.563  1.00 22.69           C  
ANISOU  284  CA  CYS B 892     3286   2733   2600     14    250    -68
ATOM    285  C   CYS B 892     123.245  61.186  16.072  1.00 27.33           C  
ANISOU  285  C   CYS B 892     3870   3297   3217      0    248   -106
ATOM    286  O   CYS B 892     123.260  62.298  15.547  1.00 23.16           O  
ANISOU  286  O   CYS B 892     3309   2759   2731    -17    216   -105
ATOM    287  CB  CYS B 892     122.983  59.228  14.529  1.00 22.24           C  
ANISOU  287  CB  CYS B 892     3212   2649   2588     19    303    -46
ATOM    288  SG  CYS B 892     121.912  57.906  13.886  1.00 29.64           S  
ANISOU  288  SG  CYS B 892     4160   3595   3507     28    322     -6
ATOM    289  H   CYS B 892     121.298  61.606  14.423  1.00  0.00           H  
ATOM    290  HG  CYS B 892     121.071  58.726  13.244  1.00  0.00           H  
ATOM    291  N   ARG B 893     124.089  60.822  17.042  1.00 20.97           N  
ANISOU  291  N   ARG B 893     3099   2480   2387     10    285   -140
ATOM    292  CA  ARG B 893     125.278  61.588  17.396  1.00 21.53           C  
ANISOU  292  CA  ARG B 893     3167   2512   2501      2    299   -179
ATOM    293  C   ARG B 893     126.477  60.875  16.773  1.00 23.24           C  
ANISOU  293  C   ARG B 893     3373   2695   2760     20    361   -173
ATOM    294  O   ARG B 893     126.604  59.662  16.949  1.00 29.72           O  
ANISOU  294  O   ARG B 893     4216   3529   3546     35    404   -168
ATOM    295  CB  ARG B 893     125.423  61.679  18.925  1.00 29.85           C  
ANISOU  295  CB  ARG B 893     4264   3579   3495     -1    293   -239
ATOM    296  CG  ARG B 893     126.571  62.596  19.380  1.00 37.53           C  
ANISOU  296  CG  ARG B 893     5237   4502   4520    -13    307   -288
ATOM    297  CD  ARG B 893     126.659  62.725  20.904  1.00 39.34           C  
ANISOU  297  CD  ARG B 893     5508   4749   4688    -23    297   -361
ATOM    298  NE  ARG B 893     125.451  63.344  21.468  1.00 41.79           N  
ANISOU  298  NE  ARG B 893     5812   5104   4961    -47    231   -372
ATOM    299  CZ  ARG B 893     125.211  64.658  21.551  1.00 46.90           C  
ANISOU  299  CZ  ARG B 893     6432   5729   5657    -82    196   -389
ATOM    300  NH1 ARG B 893     126.105  65.550  21.144  1.00 58.62           N  
ANISOU  300  NH1 ARG B 893     7900   7141   7229    -96    218   -391
ATOM    301  NH2 ARG B 893     124.057  65.090  22.042  1.00 47.72           N1+
ANISOU  301  NH2 ARG B 893     6524   5884   5722   -103    139   -400
ATOM    302  H   ARG B 893     124.023  59.879  17.422  1.00  0.00           H  
ATOM    303  HE  ARG B 893     124.745  62.692  21.788  1.00  0.00           H  
ATOM    304 HH12 ARG B 893     125.949  66.543  21.199  1.00  0.00           H  
ATOM    305 HH11 ARG B 893     126.966  65.282  20.667  1.00  0.00           H  
ATOM    306 HH22 ARG B 893     123.855  66.076  22.115  1.00  0.00           H  
ATOM    307 HH21 ARG B 893     123.342  64.458  22.366  1.00  0.00           H  
ATOM    308  N   TYR B 894     127.337  61.619  16.078  1.00 23.91           N  
ANISOU  308  N   TYR B 894     3420   2739   2922     20    367   -168
ATOM    309  CA  TYR B 894     128.612  61.077  15.634  1.00 23.53           C  
ANISOU  309  CA  TYR B 894     3355   2663   2920     42    425   -171
ATOM    310  C   TYR B 894     129.659  61.403  16.689  1.00 24.74           C  
ANISOU  310  C   TYR B 894     3539   2781   3078     50    454   -227
ATOM    311  O   TYR B 894     130.018  62.571  16.813  1.00 29.88           O  
ANISOU  311  O   TYR B 894     4183   3393   3775     44    435   -242
ATOM    312  CB  TYR B 894     129.020  61.664  14.282  1.00 20.75           C  
ANISOU  312  CB  TYR B 894     2944   2292   2647     49    415   -134
ATOM    313  CG  TYR B 894     130.197  60.921  13.684  1.00 21.37           C  
ANISOU  313  CG  TYR B 894     2990   2355   2771     74    471   -134
ATOM    314  CD1 TYR B 894     130.055  59.565  13.334  1.00 23.15           C  
ANISOU  314  CD1 TYR B 894     3211   2607   2979     74    509   -125
ATOM    315  CD2 TYR B 894     131.434  61.564  13.487  1.00 21.99           C  
ANISOU  315  CD2 TYR B 894     3044   2393   2918     98    488   -143
ATOM    316  CE1 TYR B 894     131.124  58.879  12.745  1.00 28.13           C  
ANISOU  316  CE1 TYR B 894     3802   3228   3657     92    563   -128
ATOM    317  CE2 TYR B 894     132.514  60.861  12.924  1.00 27.46           C  
ANISOU  317  CE2 TYR B 894     3698   3078   3655    125    538   -146
ATOM    318  CZ  TYR B 894     132.356  59.517  12.544  1.00 26.65           C  
ANISOU  318  CZ  TYR B 894     3583   3008   3533    119    576   -141
ATOM    319  OH  TYR B 894     133.387  58.832  11.978  1.00 28.26           O  
ANISOU  319  OH  TYR B 894     3740   3210   3787    141    628   -147
ATOM    320  H   TYR B 894     127.173  62.617  15.947  1.00  0.00           H  
ATOM    321  HH  TYR B 894     134.178  59.381  11.910  1.00  0.00           H  
ATOM    322  N   ASP B 895     130.109  60.396  17.438  1.00 26.61           N  
ANISOU  322  N   ASP B 895     3810   3029   3268     64    505   -259
ATOM    323  CA  ASP B 895     130.808  60.608  18.703  1.00 28.75           C  
ANISOU  323  CA  ASP B 895     4123   3282   3517     67    526   -327
ATOM    324  C   ASP B 895     132.121  59.808  18.758  1.00 30.87           C  
ANISOU  324  C   ASP B 895     4393   3531   3802     96    604   -353
ATOM    325  O   ASP B 895     132.260  58.925  19.607  1.00 32.49           O  
ANISOU  325  O   ASP B 895     4642   3765   3938    103    642   -388
ATOM    326  CB  ASP B 895     129.884  60.272  19.890  1.00 37.57           C  
ANISOU  326  CB  ASP B 895     5293   4452   4530     55    501   -355
ATOM    327  CG  ASP B 895     130.376  60.855  21.211  1.00 41.17           C  
ANISOU  327  CG  ASP B 895     5785   4895   4961     47    498   -436
ATOM    328  OD1 ASP B 895     130.693  62.062  21.240  1.00 41.45           O  
ANISOU  328  OD1 ASP B 895     5805   4880   5062     30    477   -462
ATOM    329  OD2 ASP B 895     130.304  60.134  22.224  1.00 41.84           O1-
ANISOU  329  OD2 ASP B 895     5916   5021   4958     55    518   -476
ATOM    330  H   ASP B 895     129.893  59.436  17.174  1.00  0.00           H  
ATOM    331  N   PRO B 896     133.075  60.102  17.849  1.00 32.90           N  
ANISOU  331  N   PRO B 896     4601   3748   4151    115    628   -336
ATOM    332  CA  PRO B 896     134.365  59.401  17.824  1.00 37.14           C  
ANISOU  332  CA  PRO B 896     5126   4267   4716    146    705   -362
ATOM    333  C   PRO B 896     135.193  59.505  19.116  1.00 39.22           C  
ANISOU  333  C   PRO B 896     5437   4506   4957    158    742   -442
ATOM    334  O   PRO B 896     135.960  58.589  19.407  1.00 38.77           O  
ANISOU  334  O   PRO B 896     5389   4458   4882    179    811   -472
ATOM    335  CB  PRO B 896     135.099  59.998  16.621  1.00 43.16           C  
ANISOU  335  CB  PRO B 896     5821   4990   5586    168    701   -329
ATOM    336  CG  PRO B 896     134.449  61.342  16.376  1.00 34.95           C  
ANISOU  336  CG  PRO B 896     4777   3929   4571    149    628   -304
ATOM    337  CD  PRO B 896     133.021  61.154  16.838  1.00 39.80           C  
ANISOU  337  CD  PRO B 896     5426   4591   5103    113    584   -294
ATOM    338  N   GLU B 897     135.027  60.596  19.876  1.00 34.89           N  
ANISOU  338  N   GLU B 897     4916   3928   4410    141    700   -481
ATOM    339  CA  GLU B 897     135.695  60.760  21.168  1.00 43.14           C  
ANISOU  339  CA  GLU B 897     6009   4951   5430    145    731   -571
ATOM    340  C   GLU B 897     135.028  59.986  22.321  1.00 53.83           C  
ANISOU  340  C   GLU B 897     7421   6375   6657    131    730   -611
ATOM    341  O   GLU B 897     135.675  59.780  23.349  1.00 45.88           O  
ANISOU  341  O   GLU B 897     6454   5368   5610    138    765   -690
ATOM    342  CB  GLU B 897     135.845  62.246  21.515  1.00 43.84           C  
ANISOU  342  CB  GLU B 897     6103   4972   5581    127    693   -605
ATOM    343  CG  GLU B 897     136.804  62.979  20.561  1.00 52.05           C  
ANISOU  343  CG  GLU B 897     7097   5935   6743    156    709   -574
ATOM    344  CD  GLU B 897     137.111  64.407  21.000  1.00 55.63           C  
ANISOU  344  CD  GLU B 897     7564   6305   7265    141    688   -608
ATOM    345  OE1 GLU B 897     136.181  65.152  21.355  1.00 69.68           O  
ANISOU  345  OE1 GLU B 897     9359   8092   9022     96    633   -610
ATOM    346  OE2 GLU B 897     138.299  64.783  20.963  1.00 68.65           O1-
ANISOU  346  OE2 GLU B 897     9206   7880   8996    175    730   -631
ATOM    347  H   GLU B 897     134.400  61.330  19.580  1.00  0.00           H  
ATOM    348  N   GLY B 898     133.782  59.533  22.140  1.00 44.61           N  
ANISOU  348  N   GLY B 898     6258   5267   5424    114    689   -558
ATOM    349  CA  GLY B 898     133.107  58.628  23.070  1.00 41.69           C  
ANISOU  349  CA  GLY B 898     5942   4971   4927    111    688   -577
ATOM    350  C   GLY B 898     132.650  59.300  24.372  1.00 48.23           C  
ANISOU  350  C   GLY B 898     6810   5822   5693     89    637   -649
ATOM    351  O   GLY B 898     132.564  58.619  25.396  1.00 60.97           O  
ANISOU  351  O   GLY B 898     8471   7494   7198     97    648   -691
ATOM    352  H   GLY B 898     133.294  59.745  21.277  1.00  0.00           H  
ATOM    353  N   ASP B 899     132.384  60.608  24.367  1.00 45.36           N  
ANISOU  353  N   ASP B 899     6425   5417   5391     60    581   -664
ATOM    354  CA  ASP B 899     132.046  61.387  25.559  1.00 43.41           C  
ANISOU  354  CA  ASP B 899     6204   5187   5101     29    530   -742
ATOM    355  C   ASP B 899     130.764  62.221  25.392  1.00 45.35           C  
ANISOU  355  C   ASP B 899     6424   5450   5355     -5    448   -708
ATOM    356  O   ASP B 899     130.539  63.130  26.196  1.00 42.09           O  
ANISOU  356  O   ASP B 899     6013   5029   4948    -41    406   -771
ATOM    357  CB  ASP B 899     133.210  62.299  25.998  1.00 54.61           C  
ANISOU  357  CB  ASP B 899     7627   6524   6598     20    558   -825
ATOM    358  CG  ASP B 899     133.658  63.323  24.950  1.00 55.34           C  
ANISOU  358  CG  ASP B 899     7673   6524   6827     14    556   -778
ATOM    359  OD1 ASP B 899     133.155  63.313  23.805  1.00 45.76           O  
ANISOU  359  OD1 ASP B 899     6423   5318   5645     20    538   -686
ATOM    360  OD2 ASP B 899     134.512  64.155  25.314  1.00 49.44           O1-
ANISOU  360  OD2 ASP B 899     6929   5698   6156      7    575   -834
ATOM    361  H   ASP B 899     132.456  61.145  23.507  1.00  0.00           H  
ATOM    362  N   ASN B 900     129.932  61.919  24.389  1.00 45.60           N  
ANISOU  362  N   ASN B 900     6430   5506   5390      1    428   -616
ATOM    363  CA  ASN B 900     128.677  62.626  24.096  1.00 47.28           C  
ANISOU  363  CA  ASN B 900     6613   5741   5609    -26    356   -579
ATOM    364  C   ASN B 900     128.888  64.104  23.717  1.00 44.54           C  
ANISOU  364  C   ASN B 900     6231   5323   5368    -59    335   -585
ATOM    365  O   ASN B 900     127.976  64.912  23.904  1.00 44.42           O  
ANISOU  365  O   ASN B 900     6197   5324   5355    -93    278   -586
ATOM    366  CB  ASN B 900     127.675  62.481  25.271  1.00 59.14           C  
ANISOU  366  CB  ASN B 900     8141   7325   7004    -37    302   -622
ATOM    367  CG  ASN B 900     127.154  61.061  25.464  1.00 70.76           C  
ANISOU  367  CG  ASN B 900     9646   8871   8367      1    314   -585
ATOM    368  OD1 ASN B 900     127.051  60.275  24.525  1.00 60.06           O  
ANISOU  368  OD1 ASN B 900     8284   7510   7025     24    347   -510
ATOM    369  ND2 ASN B 900     126.793  60.720  26.693  1.00 92.06           N  
ANISOU  369  ND2 ASN B 900    12379  11640  10958      7    288   -638
ATOM    370  H   ASN B 900     130.179  61.172  23.729  1.00  0.00           H  
ATOM    371 HD22 ASN B 900     126.439  59.795  26.887  1.00  0.00           H  
ATOM    372 HD21 ASN B 900     126.869  61.383  27.453  1.00  0.00           H  
ATOM    373  N   THR B 901     130.061  64.454  23.185  1.00 38.96           N  
ANISOU  373  N   THR B 901     5514   4538   4749    -47    382   -583
ATOM    374  CA  THR B 901     130.346  65.815  22.730  1.00 45.59           C  
ANISOU  374  CA  THR B 901     6324   5302   5693    -71    370   -571
ATOM    375  C   THR B 901     130.314  65.938  21.199  1.00 36.58           C  
ANISOU  375  C   THR B 901     5141   4142   4615    -52    373   -475
ATOM    376  O   THR B 901     130.416  67.055  20.685  1.00 38.89           O  
ANISOU  376  O   THR B 901     5409   4383   4985    -66    361   -446
ATOM    377  CB  THR B 901     131.720  66.321  23.226  1.00 41.30           C  
ANISOU  377  CB  THR B 901     5799   4671   5219    -68    417   -636
ATOM    378  OG1 THR B 901     132.812  65.694  22.570  1.00 41.00           O  
ANISOU  378  OG1 THR B 901     5754   4602   5220    -19    476   -608
ATOM    379  CG2 THR B 901     131.872  66.181  24.742  1.00 44.05           C  
ANISOU  379  CG2 THR B 901     6192   5041   5503    -85    421   -746
ATOM    380  H   THR B 901     130.793  63.757  23.069  1.00  0.00           H  
ATOM    381  HG1 THR B 901     132.943  64.799  22.964  1.00  0.00           H  
ATOM    382  N   GLY B 902     130.168  64.816  20.484  1.00 33.43           N  
ANISOU  382  N   GLY B 902     4733   3786   4182    -22    389   -427
ATOM    383  CA  GLY B 902     130.117  64.802  19.029  1.00 33.11           C  
ANISOU  383  CA  GLY B 902     4647   3741   4191     -6    386   -346
ATOM    384  C   GLY B 902     128.877  65.519  18.484  1.00 29.59           C  
ANISOU  384  C   GLY B 902     4174   3323   3745    -33    327   -298
ATOM    385  O   GLY B 902     127.912  65.742  19.212  1.00 32.06           O  
ANISOU  385  O   GLY B 902     4500   3672   4008    -61    288   -321
ATOM    386  H   GLY B 902     130.169  63.909  20.958  1.00  0.00           H  
ATOM    387  N   GLU B 903     128.898  65.889  17.202  1.00 32.60           N  
ANISOU  387  N   GLU B 903     4513   3692   4179    -22    321   -235
ATOM    388  CA  GLU B 903     127.783  66.569  16.544  1.00 27.30           C  
ANISOU  388  CA  GLU B 903     3813   3050   3507    -43    272   -187
ATOM    389  C   GLU B 903     126.570  65.636  16.346  1.00 30.64           C  
ANISOU  389  C   GLU B 903     4235   3545   3861    -43    249   -168
ATOM    390  O   GLU B 903     126.737  64.451  16.040  1.00 26.50           O  
ANISOU  390  O   GLU B 903     3713   3039   3315    -21    276   -159
ATOM    391  CB  GLU B 903     128.251  67.165  15.204  1.00 31.81           C  
ANISOU  391  CB  GLU B 903     4342   3596   4145    -26    273   -125
ATOM    392  CG  GLU B 903     128.782  66.123  14.199  1.00 50.13           C  
ANISOU  392  CG  GLU B 903     6636   5933   6475      9    299    -99
ATOM    393  CD  GLU B 903     129.174  66.725  12.859  1.00 60.49           C  
ANISOU  393  CD  GLU B 903     7901   7239   7843     30    289    -42
ATOM    394  OE1 GLU B 903     129.924  66.066  12.117  1.00 54.71           O  
ANISOU  394  OE1 GLU B 903     7140   6507   7137     62    315    -31
ATOM    395  OE2 GLU B 903     128.728  67.846  12.535  1.00 41.28           O1-
ANISOU  395  OE2 GLU B 903     5456   4805   5423     15    256     -8
ATOM    396  H   GLU B 903     129.694  65.651  16.629  1.00  0.00           H  
ATOM    397  N   GLN B 904     125.372  66.210  16.489  1.00 23.08           N  
ANISOU  397  N   GLN B 904     3271   2624   2874    -69    203   -162
ATOM    398  CA  GLN B 904     124.112  65.563  16.146  1.00 21.87           C  
ANISOU  398  CA  GLN B 904     3109   2530   2669    -65    178   -136
ATOM    399  C   GLN B 904     123.859  65.704  14.634  1.00 25.05           C  
ANISOU  399  C   GLN B 904     3469   2939   3109    -57    172    -80
ATOM    400  O   GLN B 904     124.007  66.801  14.090  1.00 22.51           O  
ANISOU  400  O   GLN B 904     3120   2598   2833    -67    159    -56
ATOM    401  CB  GLN B 904     122.977  66.168  16.992  1.00 23.50           C  
ANISOU  401  CB  GLN B 904     3315   2776   2837    -91    129   -153
ATOM    402  CG  GLN B 904     123.119  65.837  18.492  1.00 38.60           C  
ANISOU  402  CG  GLN B 904     5264   4708   4693    -97    121   -213
ATOM    403  CD  GLN B 904     121.996  66.454  19.319  1.00 43.42           C  
ANISOU  403  CD  GLN B 904     5858   5363   5276   -125     68   -231
ATOM    404  OE1 GLN B 904     120.927  65.871  19.470  1.00 39.81           O  
ANISOU  404  OE1 GLN B 904     5373   4888   4865   -158     52   -230
ATOM    405  NE2 GLN B 904     122.224  67.640  19.871  1.00 39.87           N  
ANISOU  405  NE2 GLN B 904     5424   4973   4751   -109     43   -244
ATOM    406  H   GLN B 904     125.320  67.197  16.691  1.00  0.00           H  
ATOM    407 HE22 GLN B 904     121.512  68.091  20.426  1.00  0.00           H  
ATOM    408 HE21 GLN B 904     123.102  68.120  19.735  1.00  0.00           H  
ATOM    409  N   VAL B 905     123.496  64.595  13.993  1.00 19.08           N  
ANISOU  409  N   VAL B 905     2708   2209   2332    -39    182    -60
ATOM    410  CA  VAL B 905     123.269  64.463  12.561  1.00 19.93           C  
ANISOU  410  CA  VAL B 905     2773   2330   2467    -33    176    -20
ATOM    411  C   VAL B 905     121.965  63.690  12.309  1.00 17.38           C  
ANISOU  411  C   VAL B 905     2451   2049   2103    -32    159     -9
ATOM    412  O   VAL B 905     121.538  62.891  13.145  1.00 19.33           O  
ANISOU  412  O   VAL B 905     2734   2309   2301    -25    164    -23
ATOM    413  CB  VAL B 905     124.443  63.704  11.872  1.00 17.88           C  
ANISOU  413  CB  VAL B 905     2494   2045   2251    -13    217    -12
ATOM    414  CG1 VAL B 905     125.670  64.606  11.711  1.00 19.72           C  
ANISOU  414  CG1 VAL B 905     2723   2234   2535     -5    230    -17
ATOM    415  CG2 VAL B 905     124.843  62.374  12.541  1.00 15.47           C  
ANISOU  415  CG2 VAL B 905     2219   1736   1921     -1    261    -32
ATOM    416  H   VAL B 905     123.353  63.731  14.519  1.00  0.00           H  
ATOM    417  N   ALA B 906     121.355  63.952  11.153  1.00 14.16           N  
ANISOU  417  N   ALA B 906     2004   1663   1711    -34    140     16
ATOM    418  CA  ALA B 906     120.203  63.226  10.649  1.00 11.51           C  
ANISOU  418  CA  ALA B 906     1666   1357   1350    -30    131     23
ATOM    419  C   ALA B 906     120.727  62.195   9.647  1.00 17.71           C  
ANISOU  419  C   ALA B 906     2435   2129   2164    -23    166     29
ATOM    420  O   ALA B 906     121.337  62.567   8.645  1.00 18.96           O  
ANISOU  420  O   ALA B 906     2555   2283   2364    -23    170     35
ATOM    421  CB  ALA B 906     119.239  64.217   9.994  1.00 12.47           C  
ANISOU  421  CB  ALA B 906     1755   1514   1469    -40     90     37
ATOM    422  H   ALA B 906     121.835  64.528  10.463  1.00  0.00           H  
ATOM    423  N   VAL B 907     120.523  60.920   9.961  1.00 14.81           N  
ANISOU  423  N   VAL B 907     2096   1755   1776    -16    192     26
ATOM    424  CA  VAL B 907     121.026  59.786   9.209  1.00 16.14           C  
ANISOU  424  CA  VAL B 907     2254   1904   1974    -16    238     27
ATOM    425  C   VAL B 907     119.819  59.104   8.555  1.00 20.15           C  
ANISOU  425  C   VAL B 907     2756   2416   2481    -19    237     32
ATOM    426  O   VAL B 907     118.910  58.665   9.261  1.00 15.50           O  
ANISOU  426  O   VAL B 907     2207   1827   1854     -9    236     40
ATOM    427  CB  VAL B 907     121.736  58.786  10.160  1.00 16.94           C  
ANISOU  427  CB  VAL B 907     2398   1979   2058     -7    289     21
ATOM    428  CG1 VAL B 907     122.235  57.502   9.472  1.00 17.58           C  
ANISOU  428  CG1 VAL B 907     2459   2039   2181    -13    344     21
ATOM    429  CG2 VAL B 907     122.900  59.477  10.888  1.00 19.41           C  
ANISOU  429  CG2 VAL B 907     2721   2283   2371     -2    290      6
ATOM    430  H   VAL B 907     119.965  60.680  10.782  1.00  0.00           H  
ATOM    431  N   LYS B 908     119.818  59.048   7.222  1.00 17.30           N  
ANISOU  431  N   LYS B 908     2345   2063   2163    -32    235     25
ATOM    432  CA  LYS B 908     118.783  58.401   6.431  1.00 15.59           C  
ANISOU  432  CA  LYS B 908     2120   1844   1958    -40    241     19
ATOM    433  C   LYS B 908     119.324  57.062   5.912  1.00 19.80           C  
ANISOU  433  C   LYS B 908     2652   2340   2528    -53    300     13
ATOM    434  O   LYS B 908     120.444  57.008   5.397  1.00 17.08           O  
ANISOU  434  O   LYS B 908     2268   1995   2224    -64    321      1
ATOM    435  CB  LYS B 908     118.326  59.367   5.322  1.00 16.84           C  
ANISOU  435  CB  LYS B 908     2223   2039   2133    -50    200      5
ATOM    436  CG  LYS B 908     117.172  58.847   4.449  1.00 21.86           C  
ANISOU  436  CG  LYS B 908     2853   2671   2778    -58    201    -11
ATOM    437  CD  LYS B 908     116.618  59.946   3.530  1.00 29.13           C  
ANISOU  437  CD  LYS B 908     3730   3644   3694    -61    153    -26
ATOM    438  CE  LYS B 908     115.428  59.479   2.681  1.00 37.95           C  
ANISOU  438  CE  LYS B 908     4846   4757   4815    -65    151    -50
ATOM    439  NZ  LYS B 908     114.918  60.564   1.837  1.00 32.11           N1+
ANISOU  439  NZ  LYS B 908     4059   4077   4063    -68    108    -69
ATOM    440  H   LYS B 908     120.631  59.391   6.709  1.00  0.00           H  
ATOM    441  HZ1 LYS B 908     115.671  60.930   1.225  1.00  0.00           H  
ATOM    442  HZ2 LYS B 908     114.175  60.262   1.235  1.00  0.00           H  
ATOM    443  HZ3 LYS B 908     114.542  61.356   2.382  1.00  0.00           H  
ATOM    444  N   SER B 909     118.524  56.006   6.071  1.00 18.35           N  
ANISOU  444  N   SER B 909     2509   2126   2335    -51    330     22
ATOM    445  CA  SER B 909     118.868  54.633   5.723  1.00 22.23           C  
ANISOU  445  CA  SER B 909     3004   2575   2865    -69    396     21
ATOM    446  C   SER B 909     117.654  53.922   5.124  1.00 25.60           C  
ANISOU  446  C   SER B 909     3444   2972   3311    -77    409     18
ATOM    447  O   SER B 909     116.525  54.393   5.277  1.00 26.07           O  
ANISOU  447  O   SER B 909     3519   3043   3343    -59    369     22
ATOM    448  CB  SER B 909     119.371  53.909   6.987  1.00 29.43           C  
ANISOU  448  CB  SER B 909     3976   3463   3742    -53    445     48
ATOM    449  OG  SER B 909     118.382  53.835   8.002  1.00 37.20           O  
ANISOU  449  OG  SER B 909     5020   4446   4666    -25    429     74
ATOM    450  H   SER B 909     117.603  56.132   6.485  1.00  0.00           H  
ATOM    451  HG  SER B 909     117.609  53.379   7.641  1.00  0.00           H  
ATOM    452  N   LEU B 910     117.895  52.765   4.505  1.00 25.98           N  
ANISOU  452  N   LEU B 910     3482   2977   3411   -104    468      9
ATOM    453  CA  LEU B 910     116.823  51.921   3.990  1.00 29.05           C  
ANISOU  453  CA  LEU B 910     3886   3319   3830   -116    493      4
ATOM    454  C   LEU B 910     116.117  51.146   5.112  1.00 33.24           C  
ANISOU  454  C   LEU B 910     4502   3806   4321    -85    530     56
ATOM    455  O   LEU B 910     116.768  50.711   6.064  1.00 39.89           O  
ANISOU  455  O   LEU B 910     5384   4642   5129    -72    565     89
ATOM    456  CB  LEU B 910     117.388  50.931   2.963  1.00 34.08           C  
ANISOU  456  CB  LEU B 910     4479   3921   4546   -164    550    -26
ATOM    457  CG  LEU B 910     117.867  51.557   1.649  1.00 34.08           C  
ANISOU  457  CG  LEU B 910     4388   3968   4592   -195    511    -85
ATOM    458  CD1 LEU B 910     118.445  50.453   0.783  1.00 36.31           C  
ANISOU  458  CD1 LEU B 910     4626   4216   4955   -246    573   -119
ATOM    459  CD2 LEU B 910     116.754  52.286   0.888  1.00 37.01           C  
ANISOU  459  CD2 LEU B 910     4741   4363   4956   -191    453   -116
ATOM    460  H   LEU B 910     118.837  52.404   4.442  1.00  0.00           H  
ATOM    461  N   LYS B 911     114.805  50.946   4.945  1.00 41.73           N  
ANISOU  461  N   LYS B 911     5604   4852   5398    -69    522     62
ATOM    462  CA  LYS B 911     113.998  50.009   5.727  1.00 66.33           C  
ANISOU  462  CA  LYS B 911     8799   7917   8486    -36    563    117
ATOM    463  C   LYS B 911     114.303  48.573   5.242  1.00 61.22           C  
ANISOU  463  C   LYS B 911     8166   7190   7903    -71    653    126
ATOM    464  O   LYS B 911     114.140  48.332   4.042  1.00 51.34           O  
ANISOU  464  O   LYS B 911     6872   5907   6726   -110    667     82
ATOM    465  CB  LYS B 911     112.509  50.356   5.471  1.00 66.60           C  
ANISOU  465  CB  LYS B 911     8853   7945   8504      0    522    121
ATOM    466  CG  LYS B 911     112.022  51.599   6.241  1.00 67.36           C  
ANISOU  466  CG  LYS B 911     8928   8120   8544     29    437    110
ATOM    467  CD  LYS B 911     110.746  52.259   5.679  1.00 70.00           C  
ANISOU  467  CD  LYS B 911     9283   8452   8860     73    404    119
ATOM    468  CE  LYS B 911     109.564  51.311   5.404  1.00 67.43           C  
ANISOU  468  CE  LYS B 911     9036   8093   8492    126    430    183
ATOM    469  NZ  LYS B 911     108.333  52.047   5.076  1.00 83.16           N1+
ANISOU  469  NZ  LYS B 911    11043  10084  10468    178    396    194
ATOM    470  H   LYS B 911     114.361  51.298   4.102  1.00  0.00           H  
ATOM    471  HZ1 LYS B 911     107.599  51.408   4.829  1.00  0.00           H  
ATOM    472  HZ2 LYS B 911     108.006  52.554   5.918  1.00  0.00           H  
ATOM    473  HZ3 LYS B 911     108.468  52.694   4.304  1.00  0.00           H  
ATOM    474  N   PRO B 912     114.744  47.647   6.132  1.00 72.91           N  
ANISOU  474  N   PRO B 912     9705   8640   9356    -59    716    180
ATOM    475  CA  PRO B 912     114.924  46.233   5.754  1.00 99.16           C  
ANISOU  475  CA  PRO B 912    13050  11883  12741    -94    814    198
ATOM    476  C   PRO B 912     113.627  45.450   5.627  1.00 70.72           C  
ANISOU  476  C   PRO B 912     9505   8202   9162    -73    845    234
ATOM    477  O   PRO B 912     112.967  45.425   4.587  1.00 64.66           O  
ANISOU  477  O   PRO B 912     8705   7398   8464    -99    839    189
ATOM    478  CB  PRO B 912     115.810  45.686   6.886  1.00105.23           C  
ANISOU  478  CB  PRO B 912    13867  12662  13451    -78    865    250
ATOM    479  CG  PRO B 912     115.418  46.491   8.107  1.00 98.70           C  
ANISOU  479  CG  PRO B 912    13084  11895  12522    -14    797    279
ATOM    480  CD  PRO B 912     115.059  47.863   7.549  1.00 88.27           C  
ANISOU  480  CD  PRO B 912    11703  10629  11208    -13    702    224
ATOM    481  N   ASN B 917     114.527  45.750  -3.710  1.00 75.96           N  
ANISOU  481  N   ASN B 917     9625   8873  10361   -473    799   -337
ATOM    482  CA  ASN B 917     115.579  46.524  -3.008  1.00 71.80           C  
ANISOU  482  CA  ASN B 917     9082   8433   9765   -440    759   -297
ATOM    483  C   ASN B 917     115.801  47.916  -3.679  1.00 62.58           C  
ANISOU  483  C   ASN B 917     7841   7379   8556   -426    658   -347
ATOM    484  O   ASN B 917     115.744  48.057  -4.905  1.00 67.03           O  
ANISOU  484  O   ASN B 917     8331   7974   9160   -466    631   -430
ATOM    485  CB  ASN B 917     116.887  45.711  -2.946  1.00 71.13           C  
ANISOU  485  CB  ASN B 917     8961   8339   9724   -482    825   -291
ATOM    486  CG  ASN B 917     117.967  46.398  -2.112  1.00 85.93           C  
ANISOU  486  CG  ASN B 917    10829  10288  11530   -441    795   -246
ATOM    487  OD1 ASN B 917     118.827  47.080  -2.661  1.00 46.19           O  
ANISOU  487  OD1 ASN B 917     5716   5335   6497   -447    746   -286
ATOM    488  ND2 ASN B 917     117.874  46.297  -0.793  1.00 75.27           N  
ANISOU  488  ND2 ASN B 917     9566   8912  10119   -395    820   -166
ATOM    489  H11 ASN B 917     114.360  44.879  -3.217  1.00  0.00           H  
ATOM    490  H22 ASN B 917     113.646  46.253  -3.649  1.00  0.00           H  
ATOM    491 HD22 ASN B 917     118.545  46.747  -0.190  1.00  0.00           H  
ATOM    492 HD21 ASN B 917     117.131  45.756  -0.371  1.00  0.00           H  
ATOM    493  N   HIS B 918     116.099  48.909  -2.834  1.00 61.01           N  
ANISOU  493  N   HIS B 918     7664   7242   8274   -371    607   -297
ATOM    494  CA  HIS B 918     116.124  50.316  -3.217  1.00 45.34           C  
ANISOU  494  CA  HIS B 918     5633   5357   6238   -346    514   -322
ATOM    495  C   HIS B 918     117.463  50.978  -2.923  1.00 30.46           C  
ANISOU  495  C   HIS B 918     3708   3541   4323   -331    486   -302
ATOM    496  O   HIS B 918     117.524  52.207  -2.844  1.00 26.76           O  
ANISOU  496  O   HIS B 918     3224   3145   3798   -297    417   -293
ATOM    497  CB  HIS B 918     114.991  51.047  -2.495  1.00 46.24           C  
ANISOU  497  CB  HIS B 918     5810   5474   6284   -293    475   -285
ATOM    498  CG  HIS B 918     113.647  50.474  -2.819  1.00 63.66           C  
ANISOU  498  CG  HIS B 918     8053   7613   8522   -298    499   -308
ATOM    499  ND1 HIS B 918     112.878  50.953  -3.854  1.00 67.71           N  
ANISOU  499  ND1 HIS B 918     8529   8153   9042   -307    459   -375
ATOM    500  CD2 HIS B 918     112.950  49.425  -2.272  1.00 59.52           C  
ANISOU  500  CD2 HIS B 918     7601   6987   8025   -292    565   -271
ATOM    501  CE1 HIS B 918     111.766  50.218  -3.898  1.00 76.46           C  
ANISOU  501  CE1 HIS B 918     9684   9178  10188   -306    498   -385
ATOM    502  NE2 HIS B 918     111.754  49.253  -2.975  1.00 67.70           N  
ANISOU  502  NE2 HIS B 918     8642   7987   9092   -295    563   -317
ATOM    503  H   HIS B 918     116.252  48.708  -1.854  1.00  0.00           H  
ATOM    504  HD1 HIS B 918     113.145  51.717  -4.477  1.00  0.00           H  
ATOM    505  N   ILE B 919     118.531  50.183  -2.785  1.00 30.61           N  
ANISOU  505  N   ILE B 919     3706   3539   4385   -357    542   -295
ATOM    506  CA  ILE B 919     119.874  50.717  -2.575  1.00 34.90           C  
ANISOU  506  CA  ILE B 919     4209   4139   4911   -339    524   -278
ATOM    507  C   ILE B 919     120.285  51.684  -3.689  1.00 30.91           C  
ANISOU  507  C   ILE B 919     3615   3725   4404   -340    449   -328
ATOM    508  O   ILE B 919     120.828  52.750  -3.396  1.00 26.14           O  
ANISOU  508  O   ILE B 919     2998   3179   3753   -300    397   -302
ATOM    509  CB  ILE B 919     120.946  49.610  -2.407  1.00 41.18           C  
ANISOU  509  CB  ILE B 919     4982   4900   5764   -371    605   -276
ATOM    510  CG1 ILE B 919     120.798  48.910  -1.042  1.00 55.01           C  
ANISOU  510  CG1 ILE B 919     6829   6583   7487   -352    672   -208
ATOM    511  CG2 ILE B 919     122.375  50.157  -2.516  1.00 41.17           C  
ANISOU  511  CG2 ILE B 919     4913   4965   5761   -354    580   -280
ATOM    512  CD1 ILE B 919     121.704  47.686  -0.869  1.00 60.36           C  
ANISOU  512  CD1 ILE B 919     7494   7221   8218   -386    766   -202
ATOM    513  H   ILE B 919     118.434  49.176  -2.871  1.00  0.00           H  
ATOM    514  N   ALA B 920     119.988  51.302  -4.936  1.00 28.52           N  
ANISOU  514  N   ALA B 920     3251   3432   4152   -384    443   -400
ATOM    515  CA  ALA B 920     120.280  52.139  -6.088  1.00 34.58           C  
ANISOU  515  CA  ALA B 920     3931   4297   4911   -384    369   -453
ATOM    516  C   ALA B 920     119.583  53.497  -5.991  1.00 32.51           C  
ANISOU  516  C   ALA B 920     3697   4088   4567   -338    295   -430
ATOM    517  O   ALA B 920     120.217  54.509  -6.250  1.00 28.94           O  
ANISOU  517  O   ALA B 920     3201   3717   4076   -308    235   -422
ATOM    518  CB  ALA B 920     119.883  51.424  -7.377  1.00 36.44           C  
ANISOU  518  CB  ALA B 920     4103   4532   5209   -444    376   -545
ATOM    519  H   ALA B 920     119.522  50.418  -5.089  1.00  0.00           H  
ATOM    520  N   ASP B 921     118.324  53.507  -5.552  1.00 25.97           N  
ANISOU  520  N   ASP B 921     2941   3213   3713   -329    303   -414
ATOM    521  CA  ASP B 921     117.552  54.734  -5.351  1.00 32.77           C  
ANISOU  521  CA  ASP B 921     3827   4123   4499   -288    241   -394
ATOM    522  C   ASP B 921     118.161  55.663  -4.300  1.00 28.33           C  
ANISOU  522  C   ASP B 921     3295   3583   3883   -242    219   -319
ATOM    523  O   ASP B 921     118.259  56.868  -4.534  1.00 23.36           O  
ANISOU  523  O   ASP B 921     2646   3024   3204   -214    161   -305
ATOM    524  CB  ASP B 921     116.074  54.468  -5.020  1.00 35.04           C  
ANISOU  524  CB  ASP B 921     4183   4351   4778   -283    260   -393
ATOM    525  CG  ASP B 921     115.281  53.889  -6.188  1.00 49.71           C  
ANISOU  525  CG  ASP B 921     6010   6199   6679   -322    265   -476
ATOM    526  OD1 ASP B 921     115.535  54.298  -7.346  1.00 45.20           O  
ANISOU  526  OD1 ASP B 921     5365   5702   6106   -340    221   -538
ATOM    527  OD2 ASP B 921     114.351  53.101  -5.918  1.00 58.62           O1-
ANISOU  527  OD2 ASP B 921     7189   7243   7840   -332    312   -482
ATOM    528  H   ASP B 921     117.899  52.641  -5.252  1.00  0.00           H  
ATOM    529  N   LEU B 922     118.586  55.093  -3.169  1.00 22.43           N  
ANISOU  529  N   LEU B 922     2600   2776   3145   -234    269   -272
ATOM    530  CA  LEU B 922     119.235  55.865  -2.117  1.00 22.89           C  
ANISOU  530  CA  LEU B 922     2689   2847   3159   -195    254   -213
ATOM    531  C   LEU B 922     120.583  56.437  -2.573  1.00 21.18           C  
ANISOU  531  C   LEU B 922     2406   2687   2954   -185    228   -214
ATOM    532  O   LEU B 922     120.860  57.610  -2.333  1.00 21.81           O  
ANISOU  532  O   LEU B 922     2485   2808   2992   -153    184   -181
ATOM    533  CB  LEU B 922     119.383  55.016  -0.844  1.00 25.59           C  
ANISOU  533  CB  LEU B 922     3099   3119   3504   -189    315   -172
ATOM    534  CG  LEU B 922     120.017  55.759   0.347  1.00 25.42           C  
ANISOU  534  CG  LEU B 922     3114   3103   3440   -154    306   -122
ATOM    535  CD1 LEU B 922     119.207  57.004   0.722  1.00 25.96           C  
ANISOU  535  CD1 LEU B 922     3209   3205   3450   -128    249   -102
ATOM    536  CD2 LEU B 922     120.145  54.828   1.549  1.00 23.75           C  
ANISOU  536  CD2 LEU B 922     2969   2831   3223   -149    368    -91
ATOM    537  H   LEU B 922     118.471  54.094  -3.032  1.00  0.00           H  
ATOM    538  N   LYS B 923     121.386  55.622  -3.267  1.00 21.73           N  
ANISOU  538  N   LYS B 923     2417   2757   3081   -213    257   -250
ATOM    539  CA  LYS B 923     122.646  56.080  -3.846  1.00 21.76           C  
ANISOU  539  CA  LYS B 923     2347   2818   3100   -197    230   -254
ATOM    540  C   LYS B 923     122.455  57.249  -4.823  1.00 21.91           C  
ANISOU  540  C   LYS B 923     2320   2923   3080   -179    152   -266
ATOM    541  O   LYS B 923     123.261  58.178  -4.821  1.00 20.28           O  
ANISOU  541  O   LYS B 923     2092   2762   2851   -140    115   -232
ATOM    542  CB  LYS B 923     123.362  54.923  -4.547  1.00 22.41           C  
ANISOU  542  CB  LYS B 923     2361   2896   3256   -235    272   -303
ATOM    543  CG  LYS B 923     124.026  53.929  -3.592  1.00 27.17           C  
ANISOU  543  CG  LYS B 923     2996   3430   3895   -244    353   -280
ATOM    544  CD  LYS B 923     124.633  52.769  -4.389  1.00 29.25           C  
ANISOU  544  CD  LYS B 923     3183   3690   4238   -292    399   -334
ATOM    545  CE  LYS B 923     125.704  51.980  -3.622  1.00 41.79           C  
ANISOU  545  CE  LYS B 923     4775   5241   5863   -292    474   -312
ATOM    546  NZ  LYS B 923     125.168  51.315  -2.422  1.00 70.81           N1+
ANISOU  546  NZ  LYS B 923     8552   8834   9519   -297    541   -270
ATOM    547  H   LYS B 923     121.103  54.658  -3.432  1.00  0.00           H  
ATOM    548  HZ1 LYS B 923     125.824  50.634  -2.069  1.00  0.00           H  
ATOM    549  HZ2 LYS B 923     124.986  51.985  -1.697  1.00  0.00           H  
ATOM    550  HZ3 LYS B 923     124.312  50.830  -2.644  1.00  0.00           H  
ATOM    551  N   LYS B 924     121.370  57.207  -5.607  1.00 19.83           N  
ANISOU  551  N   LYS B 924     2049   2680   2805   -202    130   -311
ATOM    552  CA  LYS B 924     121.012  58.297  -6.508  1.00 26.09           C  
ANISOU  552  CA  LYS B 924     2802   3561   3548   -186     59   -326
ATOM    553  C   LYS B 924     120.632  59.571  -5.735  1.00 24.12           C  
ANISOU  553  C   LYS B 924     2610   3323   3232   -145     30   -260
ATOM    554  O   LYS B 924     121.120  60.640  -6.091  1.00 21.61           O  
ANISOU  554  O   LYS B 924     2266   3070   2875   -113    -16   -231
ATOM    555  CB  LYS B 924     119.854  57.901  -7.433  1.00 34.09           C  
ANISOU  555  CB  LYS B 924     3800   4588   4564   -221     50   -397
ATOM    556  CG  LYS B 924     120.157  56.781  -8.434  1.00 54.24           C  
ANISOU  556  CG  LYS B 924     6284   7140   7184   -271     71   -478
ATOM    557  CD  LYS B 924     118.863  56.312  -9.111  1.00 66.64           C  
ANISOU  557  CD  LYS B 924     7858   8697   8764   -309     74   -551
ATOM    558  CE  LYS B 924     118.921  54.877  -9.643  1.00 65.23           C  
ANISOU  558  CE  LYS B 924     7645   8463   8675   -371    128   -622
ATOM    559  NZ  LYS B 924     117.594  54.453 -10.119  1.00 62.69           N1+
ANISOU  559  NZ  LYS B 924     7345   8106   8367   -403    140   -686
ATOM    560  H   LYS B 924     120.739  56.414  -5.543  1.00  0.00           H  
ATOM    561  HZ1 LYS B 924     116.939  54.399  -9.348  1.00  0.00           H  
ATOM    562  HZ2 LYS B 924     117.249  55.108 -10.799  1.00  0.00           H  
ATOM    563  HZ3 LYS B 924     117.653  53.549 -10.555  1.00  0.00           H  
ATOM    564  N   GLU B 925     119.804  59.443  -4.684  1.00 23.35           N  
ANISOU  564  N   GLU B 925     2587   3159   3122   -146     61   -234
ATOM    565  CA  GLU B 925     119.449  60.539  -3.774  1.00 20.40           C  
ANISOU  565  CA  GLU B 925     2264   2789   2694   -115     40   -177
ATOM    566  C   GLU B 925     120.693  61.204  -3.159  1.00 18.56           C  
ANISOU  566  C   GLU B 925     2032   2558   2460    -84     35   -123
ATOM    567  O   GLU B 925     120.761  62.435  -3.114  1.00 18.00           O  
ANISOU  567  O   GLU B 925     1964   2525   2350    -59      0    -84
ATOM    568  CB  GLU B 925     118.449  60.063  -2.691  1.00 29.69           C  
ANISOU  568  CB  GLU B 925     3517   3896   3866   -120     76   -163
ATOM    569  CG  GLU B 925     118.100  61.135  -1.628  1.00 23.63           C  
ANISOU  569  CG  GLU B 925     2796   3134   3049    -95     55   -114
ATOM    570  CD  GLU B 925     117.149  60.671  -0.534  1.00 30.14           C  
ANISOU  570  CD  GLU B 925     3684   3903   3862    -95     82   -105
ATOM    571  OE1 GLU B 925     116.822  59.470  -0.457  1.00 31.93           O  
ANISOU  571  OE1 GLU B 925     3928   4085   4119   -110    117   -131
ATOM    572  OE2 GLU B 925     116.708  61.534   0.255  1.00 31.40           O1-
ANISOU  572  OE2 GLU B 925     3877   4068   3985    -78     66    -71
ATOM    573  H   GLU B 925     119.434  58.524  -4.457  1.00  0.00           H  
ATOM    574  N   ILE B 926     121.667  60.380  -2.744  1.00 18.99           N  
ANISOU  574  N   ILE B 926     2085   2568   2561    -88     76   -122
ATOM    575  CA  ILE B 926     122.933  60.845  -2.203  1.00 14.65           C  
ANISOU  575  CA  ILE B 926     1534   2010   2022    -57     80    -80
ATOM    576  C   ILE B 926     123.717  61.660  -3.238  1.00 20.70           C  
ANISOU  576  C   ILE B 926     2231   2847   2784    -30     32    -72
ATOM    577  O   ILE B 926     124.150  62.765  -2.919  1.00 19.17           O  
ANISOU  577  O   ILE B 926     2048   2665   2569      4      9    -21
ATOM    578  CB  ILE B 926     123.817  59.687  -1.669  1.00 20.91           C  
ANISOU  578  CB  ILE B 926     2329   2749   2867    -66    140    -91
ATOM    579  CG1 ILE B 926     123.182  59.069  -0.413  1.00 24.79           C  
ANISOU  579  CG1 ILE B 926     2901   3172   3345    -79    185    -79
ATOM    580  CG2 ILE B 926     125.258  60.123  -1.345  1.00 20.71           C  
ANISOU  580  CG2 ILE B 926     2284   2722   2861    -30    143    -61
ATOM    581  CD1 ILE B 926     123.741  57.691  -0.054  1.00 21.22           C  
ANISOU  581  CD1 ILE B 926     2453   2672   2938    -97    253    -96
ATOM    582  H   ILE B 926     121.538  59.372  -2.801  1.00  0.00           H  
ATOM    583  N   GLU B 927     123.865  61.128  -4.458  1.00 19.17           N  
ANISOU  583  N   GLU B 927     1968   2703   2612    -45     17   -120
ATOM    584  CA  GLU B 927     124.569  61.838  -5.520  1.00 22.93           C  
ANISOU  584  CA  GLU B 927     2373   3262   3075    -14    -35   -114
ATOM    585  C   GLU B 927     123.921  63.165  -5.901  1.00 19.92           C  
ANISOU  585  C   GLU B 927     2006   2939   2624      6    -87    -81
ATOM    586  O   GLU B 927     124.637  64.123  -6.197  1.00 20.69           O  
ANISOU  586  O   GLU B 927     2081   3081   2699     49   -122    -34
ATOM    587  CB  GLU B 927     124.739  60.969  -6.780  1.00 28.63           C  
ANISOU  587  CB  GLU B 927     3011   4038   3830    -41    -46   -187
ATOM    588  CG  GLU B 927     125.881  59.941  -6.695  1.00 38.69           C  
ANISOU  588  CG  GLU B 927     4238   5284   5177    -48     -5   -209
ATOM    589  CD  GLU B 927     127.187  60.524  -6.139  1.00 44.16           C  
ANISOU  589  CD  GLU B 927     4929   5966   5882      5     -2   -149
ATOM    590  OE1 GLU B 927     127.530  60.188  -4.991  1.00 51.70           O  
ANISOU  590  OE1 GLU B 927     5937   6843   6861      6     51   -126
ATOM    591  OE2 GLU B 927     127.814  61.378  -6.804  1.00 37.54           O1-
ANISOU  591  OE2 GLU B 927     4041   5196   5025     51    -54   -124
ATOM    592  H   GLU B 927     123.485  60.208  -4.659  1.00  0.00           H  
ATOM    593  N   ILE B 928     122.589  63.214  -5.871  1.00 24.71           N  
ANISOU  593  N   ILE B 928     2648   3543   3195    -19    -89   -102
ATOM    594  CA  ILE B 928     121.872  64.454  -6.097  1.00 22.29           C  
ANISOU  594  CA  ILE B 928     2358   3292   2819     -2   -129    -71
ATOM    595  C   ILE B 928     122.193  65.468  -4.982  1.00 20.28           C  
ANISOU  595  C   ILE B 928     2157   2997   2549     24   -121      7
ATOM    596  O   ILE B 928     122.757  66.518  -5.278  1.00 21.82           O  
ANISOU  596  O   ILE B 928     2341   3233   2715     58   -150     59
ATOM    597  CB  ILE B 928     120.343  64.243  -6.236  1.00 20.13           C  
ANISOU  597  CB  ILE B 928     2108   3020   2517    -34   -126   -115
ATOM    598  CG1 ILE B 928     120.027  63.447  -7.521  1.00 28.07           C  
ANISOU  598  CG1 ILE B 928     3055   4076   3533    -61   -142   -199
ATOM    599  CG2 ILE B 928     119.575  65.576  -6.240  1.00 22.24           C  
ANISOU  599  CG2 ILE B 928     2399   3334   2713    -16   -155    -74
ATOM    600  CD1 ILE B 928     118.618  62.848  -7.550  1.00 27.18           C  
ANISOU  600  CD1 ILE B 928     2971   3935   3420    -95   -121   -254
ATOM    601  H   ILE B 928     122.053  62.381  -5.641  1.00  0.00           H  
ATOM    602  N   LEU B 929     121.872  65.113  -3.730  1.00 18.43           N  
ANISOU  602  N   LEU B 929     1981   2681   2337      8    -80     14
ATOM    603  CA  LEU B 929     121.990  65.987  -2.564  1.00 17.32           C  
ANISOU  603  CA  LEU B 929     1893   2501   2185     22    -71     72
ATOM    604  C   LEU B 929     123.433  66.457  -2.288  1.00 17.14           C  
ANISOU  604  C   LEU B 929     1860   2460   2190     58    -69    119
ATOM    605  O   LEU B 929     123.629  67.583  -1.832  1.00 18.19           O  
ANISOU  605  O   LEU B 929     2014   2590   2306     79    -79    174
ATOM    606  CB  LEU B 929     121.340  65.280  -1.351  1.00 16.46           C  
ANISOU  606  CB  LEU B 929     1845   2319   2090      0    -32     60
ATOM    607  CG  LEU B 929     121.292  66.091  -0.036  1.00 20.82           C  
ANISOU  607  CG  LEU B 929     2449   2835   2627      5    -26    106
ATOM    608  CD1 LEU B 929     120.565  67.441  -0.206  1.00 16.59           C  
ANISOU  608  CD1 LEU B 929     1914   2348   2041      4    -56    132
ATOM    609  CD2 LEU B 929     120.703  65.240   1.106  1.00 21.19           C  
ANISOU  609  CD2 LEU B 929     2549   2821   2681    -12      5     89
ATOM    610  H   LEU B 929     121.470  64.193  -3.564  1.00  0.00           H  
ATOM    611  N   ARG B 930     124.425  65.617  -2.615  1.00 19.57           N  
ANISOU  611  N   ARG B 930     2133   2754   2546     66    -52     95
ATOM    612  CA  ARG B 930     125.850  65.911  -2.475  1.00 21.19           C  
ANISOU  612  CA  ARG B 930     2323   2938   2789    106    -46    132
ATOM    613  C   ARG B 930     126.312  67.122  -3.297  1.00 20.33           C  
ANISOU  613  C   ARG B 930     2181   2890   2653    150    -92    185
ATOM    614  O   ARG B 930     127.241  67.820  -2.893  1.00 20.00           O  
ANISOU  614  O   ARG B 930     2149   2816   2631    190    -87    239
ATOM    615  CB  ARG B 930     126.641  64.658  -2.887  1.00 25.04           C  
ANISOU  615  CB  ARG B 930     2758   3426   3329    105    -25     86
ATOM    616  CG  ARG B 930     128.137  64.714  -2.585  1.00 29.31           C  
ANISOU  616  CG  ARG B 930     3278   3938   3919    147     -7    111
ATOM    617  CD  ARG B 930     128.806  63.346  -2.755  1.00 31.85           C  
ANISOU  617  CD  ARG B 930     3553   4251   4295    133     29     57
ATOM    618  NE  ARG B 930     129.056  63.029  -4.168  1.00 26.71           N  
ANISOU  618  NE  ARG B 930     2810   3683   3654    139     -6     26
ATOM    619  CZ  ARG B 930     130.090  63.512  -4.864  1.00 28.87           C  
ANISOU  619  CZ  ARG B 930     3021   4005   3943    192    -39     50
ATOM    620  NH1 ARG B 930     130.968  64.337  -4.288  1.00 26.73           N  
ANISOU  620  NH1 ARG B 930     2773   3696   3684    245    -34    109
ATOM    621  NH2 ARG B 930     130.250  63.166  -6.135  1.00 32.68           N1+
ANISOU  621  NH2 ARG B 930     3413   4573   4429    195    -77     13
ATOM    622  H   ARG B 930     124.195  64.684  -2.952  1.00  0.00           H  
ATOM    623  HE  ARG B 930     128.413  62.367  -4.614  1.00  0.00           H  
ATOM    624 HH12 ARG B 930     131.761  64.712  -4.785  1.00  0.00           H  
ATOM    625 HH11 ARG B 930     130.864  64.611  -3.325  1.00  0.00           H  
ATOM    626 HH22 ARG B 930     131.030  63.502  -6.681  1.00  0.00           H  
ATOM    627 HH21 ARG B 930     129.591  62.528  -6.585  1.00  0.00           H  
ATOM    628  N   ASN B 931     125.667  67.322  -4.447  1.00 21.10           N  
ANISOU  628  N   ASN B 931     2239   3073   2704    146   -134    169
ATOM    629  CA  ASN B 931     126.069  68.311  -5.441  1.00 23.34           C  
ANISOU  629  CA  ASN B 931     2484   3435   2948    191   -182    217
ATOM    630  C   ASN B 931     125.068  69.467  -5.524  1.00 24.22           C  
ANISOU  630  C   ASN B 931     2630   3581   2990    186   -201    256
ATOM    631  O   ASN B 931     125.196  70.291  -6.430  1.00 26.64           O  
ANISOU  631  O   ASN B 931     2909   3967   3247    219   -241    293
ATOM    632  CB  ASN B 931     126.239  67.617  -6.806  1.00 29.28           C  
ANISOU  632  CB  ASN B 931     3152   4278   3694    195   -219    162
ATOM    633  CG  ASN B 931     127.386  66.607  -6.807  1.00 40.52           C  
ANISOU  633  CG  ASN B 931     4527   5676   5191    205   -199    130
ATOM    634  OD1 ASN B 931     128.555  66.984  -6.833  1.00 40.68           O  
ANISOU  634  OD1 ASN B 931     4523   5693   5237    258   -206    174
ATOM    635  ND2 ASN B 931     127.066  65.321  -6.773  1.00 38.05           N  
ANISOU  635  ND2 ASN B 931     4201   5340   4915    155   -170     54
ATOM    636  H   ASN B 931     124.873  66.733  -4.679  1.00  0.00           H  
ATOM    637 HD22 ASN B 931     127.777  64.604  -6.750  1.00  0.00           H  
ATOM    638 HD21 ASN B 931     126.090  65.021  -6.704  1.00  0.00           H  
ATOM    639  N   LEU B 932     124.104  69.537  -4.598  1.00 25.14           N  
ANISOU  639  N   LEU B 932     2807   3643   3101    148   -171    251
ATOM    640  CA  LEU B 932     123.236  70.700  -4.448  1.00 20.37           C  
ANISOU  640  CA  LEU B 932     2237   3061   2441    141   -179    293
ATOM    641  C   LEU B 932     123.838  71.619  -3.377  1.00 26.06           C  
ANISOU  641  C   LEU B 932     3007   3706   3187    153   -152    363
ATOM    642  O   LEU B 932     124.110  71.163  -2.264  1.00 28.07           O  
ANISOU  642  O   LEU B 932     3297   3876   3492    138   -118    349
ATOM    643  CB  LEU B 932     121.813  70.283  -4.017  1.00 19.74           C  
ANISOU  643  CB  LEU B 932     2183   2975   2341     93   -165    240
ATOM    644  CG  LEU B 932     120.992  69.426  -4.999  1.00 21.36           C  
ANISOU  644  CG  LEU B 932     2351   3239   2523     71   -182    164
ATOM    645  CD1 LEU B 932     119.633  69.099  -4.382  1.00 20.81           C  
ANISOU  645  CD1 LEU B 932     2320   3141   2444     34   -161    127
ATOM    646  CD2 LEU B 932     120.809  70.058  -6.382  1.00 28.17           C  
ANISOU  646  CD2 LEU B 932     3169   4213   3320     92   -227    168
ATOM    647  H   LEU B 932     124.051  68.828  -3.877  1.00  0.00           H  
ATOM    648  N   TYR B 933     124.015  72.897  -3.714  1.00 25.83           N  
ANISOU  648  N   TYR B 933     2982   3707   3123    181   -167    438
ATOM    649  CA  TYR B 933     124.540  73.907  -2.802  1.00 27.78           C  
ANISOU  649  CA  TYR B 933     3277   3877   3400    190   -138    508
ATOM    650  C   TYR B 933     123.633  75.126  -2.853  1.00 29.75           C  
ANISOU  650  C   TYR B 933     3550   4156   3595    174   -136    557
ATOM    651  O   TYR B 933     123.698  75.904  -3.808  1.00 28.55           O  
ANISOU  651  O   TYR B 933     3379   4077   3390    205   -160    612
ATOM    652  CB  TYR B 933     125.963  74.326  -3.201  1.00 42.48           C  
ANISOU  652  CB  TYR B 933     5122   5727   5291    253   -147    571
ATOM    653  CG  TYR B 933     126.968  73.199  -3.231  1.00 48.63           C  
ANISOU  653  CG  TYR B 933     5866   6483   6126    276   -145    527
ATOM    654  CD1 TYR B 933     127.546  72.742  -2.032  1.00 66.04           C  
ANISOU  654  CD1 TYR B 933     8105   8586   8401    266   -104    506
ATOM    655  CD2 TYR B 933     127.321  72.604  -4.457  1.00 61.31           C  
ANISOU  655  CD2 TYR B 933     7404   8175   7716    306   -185    502
ATOM    656  CE1 TYR B 933     128.482  71.696  -2.061  1.00 67.00           C  
ANISOU  656  CE1 TYR B 933     8193   8689   8573    286    -95    466
ATOM    657  CE2 TYR B 933     128.260  71.559  -4.486  1.00 61.05           C  
ANISOU  657  CE2 TYR B 933     7332   8123   7740    324   -179    460
ATOM    658  CZ  TYR B 933     128.841  71.109  -3.287  1.00 63.54           C  
ANISOU  658  CZ  TYR B 933     7683   8335   8124    315   -131    445
ATOM    659  OH  TYR B 933     129.763  70.109  -3.309  1.00 76.79           O  
ANISOU  659  OH  TYR B 933     9321   9996   9857    331   -117    403
ATOM    660  H   TYR B 933     123.757  73.218  -4.647  1.00  0.00           H  
ATOM    661  HH  TYR B 933     130.056  69.888  -2.415  1.00  0.00           H  
ATOM    662  N   HIS B 934     122.806  75.288  -1.826  1.00 24.04           N  
ANISOU  662  N   HIS B 934     2865   3385   2882    125   -108    538
ATOM    663  CA  HIS B 934     121.894  76.416  -1.732  1.00 23.00           C  
ANISOU  663  CA  HIS B 934     2751   3281   2705    101    -98    578
ATOM    664  C   HIS B 934     121.529  76.601  -0.268  1.00 24.94           C  
ANISOU  664  C   HIS B 934     3038   3445   2992     55    -63    563
ATOM    665  O   HIS B 934     121.403  75.608   0.450  1.00 21.68           O  
ANISOU  665  O   HIS B 934     2635   2991   2611     33    -57    498
ATOM    666  CB  HIS B 934     120.660  76.152  -2.609  1.00 24.21           C  
ANISOU  666  CB  HIS B 934     2873   3536   2786     88   -123    535
ATOM    667  CG  HIS B 934     119.792  77.356  -2.807  1.00 25.51           C  
ANISOU  667  CG  HIS B 934     3046   3751   2894     73   -113    581
ATOM    668  ND1 HIS B 934     118.831  77.742  -1.876  1.00 22.55           N  
ANISOU  668  ND1 HIS B 934     2692   3350   2525     28    -86    568
ATOM    669  CD2 HIS B 934     119.788  78.259  -3.842  1.00 28.52           C  
ANISOU  669  CD2 HIS B 934     3412   4217   3205    100   -126    642
ATOM    670  CE1 HIS B 934     118.280  78.841  -2.370  1.00 27.26           C  
ANISOU  670  CE1 HIS B 934     3285   4006   3064     22    -76    618
ATOM    671  NE2 HIS B 934     118.815  79.198  -3.540  1.00 30.02           N  
ANISOU  671  NE2 HIS B 934     3617   4424   3365     67    -99    666
ATOM    672  H   HIS B 934     122.795  74.640  -1.045  1.00  0.00           H  
ATOM    673  HE2 HIS B 934     118.568  79.998  -4.109  1.00  0.00           H  
ATOM    674  N   GLU B 935     121.359  77.857   0.160  1.00 24.12           N  
ANISOU  674  N   GLU B 935     2957   3317   2888     37    -39    624
ATOM    675  CA  GLU B 935     121.012  78.154   1.550  1.00 27.50           C  
ANISOU  675  CA  GLU B 935     3418   3670   3358    -11     -8    605
ATOM    676  C   GLU B 935     119.640  77.588   1.964  1.00 23.64           C  
ANISOU  676  C   GLU B 935     2920   3219   2843    -50    -14    534
ATOM    677  O   GLU B 935     119.431  77.357   3.152  1.00 22.36           O  
ANISOU  677  O   GLU B 935     2777   3002   2715    -84      0    493
ATOM    678  CB  GLU B 935     121.150  79.660   1.851  1.00 40.90           C  
ANISOU  678  CB  GLU B 935     5139   5331   5070    -29     24    683
ATOM    679  CG  GLU B 935     120.080  80.579   1.231  1.00 42.80           C  
ANISOU  679  CG  GLU B 935     5364   5654   5245    -46     28    720
ATOM    680  CD  GLU B 935     120.346  82.046   1.558  1.00 67.73           C  
ANISOU  680  CD  GLU B 935     8547   8763   8425    -65     70    808
ATOM    681  OE1 GLU B 935     121.209  82.653   0.893  1.00 61.53           O  
ANISOU  681  OE1 GLU B 935     7772   7970   7636    -22     75    892
ATOM    682  OE2 GLU B 935     119.709  82.576   2.490  1.00 65.99           O1-
ANISOU  682  OE2 GLU B 935     8333   8508   8229   -122    100    793
ATOM    683  H   GLU B 935     121.452  78.632  -0.482  1.00  0.00           H  
ATOM    684  N   ASN B 936     118.746  77.344   1.000  1.00 17.56           N  
ANISOU  684  N   ASN B 936     2118   2541   2010    -43    -36    515
ATOM    685  CA  ASN B 936     117.417  76.787   1.253  1.00 16.66           C  
ANISOU  685  CA  ASN B 936     1993   2461   1873    -70    -42    446
ATOM    686  C   ASN B 936     117.311  75.297   0.896  1.00 15.12           C  
ANISOU  686  C   ASN B 936     1786   2279   1677    -55    -63    376
ATOM    687  O   ASN B 936     116.212  74.806   0.629  1.00 16.12           O  
ANISOU  687  O   ASN B 936     1899   2451   1775    -63    -72    327
ATOM    688  CB  ASN B 936     116.339  77.640   0.562  1.00 22.68           C  
ANISOU  688  CB  ASN B 936     2734   3308   2574    -80    -41    465
ATOM    689  CG  ASN B 936     116.373  79.096   1.022  1.00 25.55           C  
ANISOU  689  CG  ASN B 936     3110   3649   2946   -106     -9    531
ATOM    690  OD1 ASN B 936     116.475  80.014   0.213  1.00 20.71           O  
ANISOU  690  OD1 ASN B 936     2514   2973   2379   -143     10    521
ATOM    691  ND2 ASN B 936     116.318  79.333   2.325  1.00 15.79           N  
ANISOU  691  ND2 ASN B 936     1867   2466   1666    -89     -4    599
ATOM    692  H   ASN B 936     118.959  77.594   0.033  1.00  0.00           H  
ATOM    693 HD22 ASN B 936     116.346  80.281   2.660  1.00  0.00           H  
ATOM    694 HD21 ASN B 936     116.175  78.575   2.990  1.00  0.00           H  
ATOM    695  N   ILE B 937     118.434  74.579   0.950  1.00 13.32           N  
ANISOU  695  N   ILE B 937     1565   2006   1488    -33    -66    371
ATOM    696  CA  ILE B 937     118.507  73.132   0.803  1.00 14.01           C  
ANISOU  696  CA  ILE B 937     1643   2089   1588    -25    -75    311
ATOM    697  C   ILE B 937     119.402  72.590   1.932  1.00 16.88           C  
ANISOU  697  C   ILE B 937     2038   2366   2008    -27    -55    300
ATOM    698  O   ILE B 937     120.433  73.197   2.233  1.00 16.24           O  
ANISOU  698  O   ILE B 937     1969   2239   1960    -14    -43    340
ATOM    699  CB  ILE B 937     119.035  72.747  -0.615  1.00 16.98           C  
ANISOU  699  CB  ILE B 937     1983   2518   1950      5    -98    310
ATOM    700  CG1 ILE B 937     117.924  73.050  -1.651  1.00 21.18           C  
ANISOU  700  CG1 ILE B 937     2485   3145   2416      6   -119    304
ATOM    701  CG2 ILE B 937     119.539  71.293  -0.742  1.00 16.52           C  
ANISOU  701  CG2 ILE B 937     1916   2434   1923      7    -96    250
ATOM    702  CD1 ILE B 937     118.269  72.765  -3.112  1.00 28.08           C  
ANISOU  702  CD1 ILE B 937     3317   4088   3263     36   -149    300
ATOM    703  H   ILE B 937     119.315  75.028   1.177  1.00  0.00           H  
ATOM    704  N   VAL B 938     118.968  71.494   2.570  1.00 17.22           N  
ANISOU  704  N   VAL B 938     2096   2385   2059    -41    -48    247
ATOM    705  CA  VAL B 938     119.679  70.825   3.661  1.00 18.35           C  
ANISOU  705  CA  VAL B 938     2273   2457   2243    -44    -27    229
ATOM    706  C   VAL B 938     121.088  70.358   3.233  1.00 17.38           C  
ANISOU  706  C   VAL B 938     2140   2304   2156    -17    -18    238
ATOM    707  O   VAL B 938     121.255  69.838   2.126  1.00 16.00           O  
ANISOU  707  O   VAL B 938     1931   2168   1978      0    -30    230
ATOM    708  CB  VAL B 938     118.838  69.634   4.218  1.00 17.06           C  
ANISOU  708  CB  VAL B 938     2127   2284   2070    -56    -22    178
ATOM    709  CG1 VAL B 938     118.659  68.443   3.255  1.00 16.04           C  
ANISOU  709  CG1 VAL B 938     1976   2177   1939    -44    -24    146
ATOM    710  CG2 VAL B 938     119.345  69.120   5.572  1.00 16.71           C  
ANISOU  710  CG2 VAL B 938     2121   2175   2050    -61     -1    163
ATOM    711  H   VAL B 938     118.095  71.058   2.287  1.00  0.00           H  
ATOM    712  N   LYS B 939     122.093  70.592   4.086  1.00 18.62           N  
ANISOU  712  N   LYS B 939     2325   2397   2352    -14      2    249
ATOM    713  CA  LYS B 939     123.466  70.185   3.798  1.00 23.65           C  
ANISOU  713  CA  LYS B 939     2951   3006   3029     17     14    261
ATOM    714  C   LYS B 939     123.608  68.653   3.815  1.00 20.48           C  
ANISOU  714  C   LYS B 939     2547   2589   2644     21     32    213
ATOM    715  O   LYS B 939     123.294  68.015   4.823  1.00 19.40           O  
ANISOU  715  O   LYS B 939     2445   2418   2507      4     53    180
ATOM    716  CB  LYS B 939     124.476  70.805   4.790  1.00 24.19           C  
ANISOU  716  CB  LYS B 939     3050   3001   3139     22     37    286
ATOM    717  CG  LYS B 939     124.509  72.344   4.816  1.00 33.41           C  
ANISOU  717  CG  LYS B 939     4218   4166   4308     25     30    349
ATOM    718  CD  LYS B 939     125.730  72.896   5.582  1.00 42.47           C  
ANISOU  718  CD  LYS B 939     5397   5226   5512     33     59    368
ATOM    719  CE  LYS B 939     125.438  74.170   6.400  1.00 56.43           C  
ANISOU  719  CE  LYS B 939     7183   6971   7286     13     65    420
ATOM    720  NZ  LYS B 939     124.951  73.866   7.758  1.00 60.57           N1+
ANISOU  720  NZ  LYS B 939     7729   7488   7796    -41     69    382
ATOM    721  H   LYS B 939     121.900  71.051   4.978  1.00  0.00           H  
ATOM    722  HZ1 LYS B 939     125.661  73.403   8.296  1.00  0.00           H  
ATOM    723  HZ2 LYS B 939     124.690  74.706   8.242  1.00  0.00           H  
ATOM    724  HZ3 LYS B 939     124.125  73.235   7.759  1.00  0.00           H  
ATOM    725  N   TYR B 940     124.186  68.114   2.734  1.00 17.37           N  
ANISOU  725  N   TYR B 940     2110   2227   2262     43     26    211
ATOM    726  CA  TYR B 940     124.921  66.851   2.752  1.00 21.64           C  
ANISOU  726  CA  TYR B 940     2637   2747   2835     52     52    176
ATOM    727  C   TYR B 940     126.137  67.024   3.674  1.00 19.90           C  
ANISOU  727  C   TYR B 940     2439   2461   2658     71     84    183
ATOM    728  O   TYR B 940     126.900  67.975   3.478  1.00 22.07           O  
ANISOU  728  O   TYR B 940     2711   2719   2955     97     79    222
ATOM    729  CB  TYR B 940     125.354  66.490   1.308  1.00 21.68           C  
ANISOU  729  CB  TYR B 940     2577   2808   2850     72     32    174
ATOM    730  CG  TYR B 940     126.411  65.401   1.151  1.00 18.57           C  
ANISOU  730  CG  TYR B 940     2154   2399   2501     82     61    142
ATOM    731  CD1 TYR B 940     126.028  64.057   0.969  1.00 17.65           C  
ANISOU  731  CD1 TYR B 940     2032   2285   2389     54     83     95
ATOM    732  CD2 TYR B 940     127.784  65.735   1.158  1.00 22.44           C  
ANISOU  732  CD2 TYR B 940     2620   2871   3035    121     72    162
ATOM    733  CE1 TYR B 940     127.009  63.063   0.783  1.00 20.46           C  
ANISOU  733  CE1 TYR B 940     2358   2627   2788     57    118     67
ATOM    734  CE2 TYR B 940     128.764  64.739   0.991  1.00 26.48           C  
ANISOU  734  CE2 TYR B 940     3096   3375   3589    129    102    130
ATOM    735  CZ  TYR B 940     128.375  63.402   0.783  1.00 20.51           C  
ANISOU  735  CZ  TYR B 940     2333   2624   2834     94    126     82
ATOM    736  OH  TYR B 940     129.314  62.432   0.589  1.00 24.89           O  
ANISOU  736  OH  TYR B 940     2852   3171   3434     95    165     51
ATOM    737  H   TYR B 940     124.383  68.717   1.950  1.00  0.00           H  
ATOM    738  HH  TYR B 940     130.225  62.751   0.618  1.00  0.00           H  
ATOM    739  N   LYS B 941     126.295  66.126   4.646  1.00 19.46           N  
ANISOU  739  N   LYS B 941     2410   2368   2614     62    121    145
ATOM    740  CA  LYS B 941     127.496  66.065   5.465  1.00 16.65           C  
ANISOU  740  CA  LYS B 941     2074   1953   2296     81    158    138
ATOM    741  C   LYS B 941     128.374  64.885   5.042  1.00 17.58           C  
ANISOU  741  C   LYS B 941     2157   2073   2449     99    190    114
ATOM    742  O   LYS B 941     129.594  65.030   5.090  1.00 20.96           O  
ANISOU  742  O   LYS B 941     2570   2471   2920    132    211    119
ATOM    743  CB  LYS B 941     127.123  66.044   6.958  1.00 23.82           C  
ANISOU  743  CB  LYS B 941     3045   2821   3182     57    179    111
ATOM    744  CG  LYS B 941     126.614  67.421   7.424  1.00 23.04           C  
ANISOU  744  CG  LYS B 941     2975   2703   3072     42    157    132
ATOM    745  CD  LYS B 941     126.142  67.459   8.882  1.00 32.72           C  
ANISOU  745  CD  LYS B 941     4256   3902   4274     16    169     96
ATOM    746  CE  LYS B 941     127.206  67.233   9.964  1.00 41.48           C  
ANISOU  746  CE  LYS B 941     5395   4946   5418     26    202     74
ATOM    747  NZ  LYS B 941     128.230  68.284  10.031  1.00 38.88           N1+
ANISOU  747  NZ  LYS B 941     5064   4573   5134     35    198    107
ATOM    748  H   LYS B 941     125.626  65.370   4.770  1.00  0.00           H  
ATOM    749  HZ1 LYS B 941     128.641  68.162  10.972  1.00  0.00           H  
ATOM    750  HZ2 LYS B 941     128.948  68.180   9.337  1.00  0.00           H  
ATOM    751  HZ3 LYS B 941     127.834  69.206  10.007  1.00  0.00           H  
ATOM    752  N   GLY B 942     127.784  63.769   4.595  1.00 16.71           N  
ANISOU  752  N   GLY B 942     2032   1991   2324     77    199     86
ATOM    753  CA  GLY B 942     128.591  62.632   4.185  1.00 20.38           C  
ANISOU  753  CA  GLY B 942     2459   2457   2825     84    236     61
ATOM    754  C   GLY B 942     127.774  61.357   4.067  1.00 17.65           C  
ANISOU  754  C   GLY B 942     2117   2122   2464     50    260     31
ATOM    755  O   GLY B 942     126.545  61.388   3.976  1.00 19.11           O  
ANISOU  755  O   GLY B 942     2323   2324   2613     26    237     31
ATOM    756  H   GLY B 942     126.775  63.670   4.554  1.00  0.00           H  
ATOM    757  N   ILE B 943     128.491  60.232   4.047  1.00 18.77           N  
ANISOU  757  N   ILE B 943     2237   2252   2640     50    310      7
ATOM    758  CA  ILE B 943     127.911  58.899   3.981  1.00 24.40           C  
ANISOU  758  CA  ILE B 943     2958   2962   3349     16    349    -16
ATOM    759  C   ILE B 943     128.543  57.974   5.036  1.00 25.47           C  
ANISOU  759  C   ILE B 943     3133   3057   3486     16    420    -29
ATOM    760  O   ILE B 943     129.639  58.240   5.539  1.00 28.10           O  
ANISOU  760  O   ILE B 943     3467   3370   3836     43    442    -31
ATOM    761  CB  ILE B 943     128.086  58.274   2.570  1.00 25.02           C  
ANISOU  761  CB  ILE B 943     2957   3078   3470      0    347    -38
ATOM    762  CG1 ILE B 943     129.559  58.103   2.153  1.00 32.56           C  
ANISOU  762  CG1 ILE B 943     3846   4044   4481     26    368    -48
ATOM    763  CG2 ILE B 943     127.341  59.112   1.523  1.00 21.24           C  
ANISOU  763  CG2 ILE B 943     2444   2650   2976      0    277    -31
ATOM    764  CD1 ILE B 943     129.746  57.202   0.934  1.00 35.45           C  
ANISOU  764  CD1 ILE B 943     4129   4444   4894      2    381    -82
ATOM    765  H   ILE B 943     129.507  60.276   4.096  1.00  0.00           H  
ATOM    766  N   CYS B 944     127.842  56.882   5.331  1.00 25.55           N  
ANISOU  766  N   CYS B 944     3178   3054   3476    -10    457    -35
ATOM    767  CA  CYS B 944     128.330  55.794   6.162  1.00 24.94           C  
ANISOU  767  CA  CYS B 944     3135   2946   3393    -13    531    -44
ATOM    768  C   CYS B 944     128.119  54.527   5.342  1.00 28.60           C  
ANISOU  768  C   CYS B 944     3564   3410   3892    -46    575    -55
ATOM    769  O   CYS B 944     126.994  54.285   4.914  1.00 25.06           O  
ANISOU  769  O   CYS B 944     3126   2961   3433    -70    559    -51
ATOM    770  CB  CYS B 944     127.570  55.753   7.498  1.00 30.89           C  
ANISOU  770  CB  CYS B 944     3979   3680   4075    -11    534    -31
ATOM    771  SG  CYS B 944     127.981  54.338   8.569  1.00 35.32           S  
ANISOU  771  SG  CYS B 944     4596   4216   4606    -11    626    -35
ATOM    772  H   CYS B 944     126.930  56.746   4.902  1.00  0.00           H  
ATOM    773  HG  CYS B 944     129.266  54.618   8.826  1.00  0.00           H  
ATOM    774  N   THR B 945     129.177  53.753   5.098  1.00 34.64           N  
ANISOU  774  N   THR B 945     4282   4172   4705    -48    633    -73
ATOM    775  CA  THR B 945     129.122  52.547   4.243  1.00 36.68           C  
ANISOU  775  CA  THR B 945     4495   4429   5011    -89    681    -90
ATOM    776  C   THR B 945     129.498  51.335   5.076  1.00 48.91           C  
ANISOU  776  C   THR B 945     6082   5945   6553   -101    778    -85
ATOM    777  O   THR B 945     130.359  51.358   5.961  1.00 47.05           O  
ANISOU  777  O   THR B 945     5870   5704   6300    -72    811    -85
ATOM    778  CB  THR B 945     130.063  52.662   3.016  1.00 47.59           C  
ANISOU  778  CB  THR B 945     5766   5849   6467    -89    669   -120
ATOM    779  OG1 THR B 945     131.386  53.049   3.380  1.00 46.01           O  
ANISOU  779  OG1 THR B 945     5543   5653   6282    -48    684   -122
ATOM    780  CG2 THR B 945     129.544  53.693   2.018  1.00 45.13           C  
ANISOU  780  CG2 THR B 945     5413   5578   6156    -84    578   -123
ATOM    781  H   THR B 945     130.091  54.023   5.439  1.00  0.00           H  
ATOM    782  HG1 THR B 945     131.712  52.419   4.039  1.00  0.00           H  
ATOM    783  N   ASN B 950     128.103  46.856   0.851  1.00 59.99           N  
ANISOU  783  N   ASN B 950     7279   7277   8235   -349    966   -184
ATOM    784  CA  ASN B 950     126.974  47.005  -0.105  1.00 67.50           C  
ANISOU  784  CA  ASN B 950     8220   8225   9201   -375    908   -208
ATOM    785  C   ASN B 950     126.031  48.151   0.351  1.00 60.18           C  
ANISOU  785  C   ASN B 950     7362   7308   8193   -329    824   -179
ATOM    786  O   ASN B 950     125.599  48.964  -0.475  1.00 55.68           O  
ANISOU  786  O   ASN B 950     6753   6777   7623   -326    744   -207
ATOM    787  CB  ASN B 950     126.146  45.705  -0.289  1.00 81.38           C  
ANISOU  787  CB  ASN B 950    10013   9908  10998   -432    984   -205
ATOM    788  CG  ASN B 950     126.968  44.418  -0.444  1.00105.30           C  
ANISOU  788  CG  ASN B 950    12998  12911  14097   -480   1093   -217
ATOM    789  OD1 ASN B 950     127.898  44.138   0.311  1.00127.41           O  
ANISOU  789  OD1 ASN B 950    15809  15722  16880   -457   1144   -193
ATOM    790  ND2 ASN B 950     126.627  43.591  -1.417  1.00100.50           N  
ANISOU  790  ND2 ASN B 950    12341  12270  13573   -549   1133   -259
ATOM    791  H11 ASN B 950     128.659  46.062   0.525  1.00  0.00           H  
ATOM    792  H22 ASN B 950     128.726  47.650   0.813  1.00  0.00           H  
ATOM    793 HD22 ASN B 950     127.148  42.737  -1.556  1.00  0.00           H  
ATOM    794 HD21 ASN B 950     125.850  43.801  -2.027  1.00  0.00           H  
ATOM    795  N   GLY B 951     125.694  48.156   1.649  1.00 48.72           N  
ANISOU  795  N   GLY B 951     6011   5827   6673   -295    843   -126
ATOM    796  CA  GLY B 951     124.762  49.095   2.252  1.00 43.56           C  
ANISOU  796  CA  GLY B 951     5424   5182   5944   -255    772    -98
ATOM    797  C   GLY B 951     125.400  50.477   2.403  1.00 46.24           C  
ANISOU  797  C   GLY B 951     5738   5577   6251   -212    697   -100
ATOM    798  O   GLY B 951     126.626  50.633   2.395  1.00 44.28           O  
ANISOU  798  O   GLY B 951     5442   5354   6027   -199    708   -112
ATOM    799  H   GLY B 951     126.153  47.481   2.249  1.00  0.00           H  
ATOM    800  N   ILE B 952     124.549  51.487   2.562  1.00 29.85           N  
ANISOU  800  N   ILE B 952     3696   3517   4126   -189    624    -88
ATOM    801  CA  ILE B 952     124.976  52.868   2.691  1.00 29.12           C  
ANISOU  801  CA  ILE B 952     3585   3471   4006   -152    556    -84
ATOM    802  C   ILE B 952     123.921  53.650   3.488  1.00 25.42           C  
ANISOU  802  C   ILE B 952     3186   3001   3469   -128    508    -56
ATOM    803  O   ILE B 952     122.741  53.289   3.460  1.00 24.20           O  
ANISOU  803  O   ILE B 952     3068   2827   3298   -139    505    -50
ATOM    804  CB  ILE B 952     125.186  53.511   1.291  1.00 31.87           C  
ANISOU  804  CB  ILE B 952     3842   3871   4396   -160    500   -118
ATOM    805  CG1 ILE B 952     125.956  54.840   1.378  1.00 34.03           C  
ANISOU  805  CG1 ILE B 952     4093   4186   4651   -119    445   -105
ATOM    806  CG2 ILE B 952     123.872  53.706   0.514  1.00 30.13           C  
ANISOU  806  CG2 ILE B 952     3622   3660   4163   -179    456   -134
ATOM    807  CD1 ILE B 952     126.586  55.250   0.047  1.00 34.93           C  
ANISOU  807  CD1 ILE B 952     4108   4357   4807   -117    403   -133
ATOM    808  H   ILE B 952     123.549  51.333   2.612  1.00  0.00           H  
ATOM    809  N   LYS B 953     124.363  54.704   4.171  1.00 23.87           N  
ANISOU  809  N   LYS B 953     3005   2823   3239    -96    473    -42
ATOM    810  CA  LYS B 953     123.505  55.673   4.838  1.00 21.61           C  
ANISOU  810  CA  LYS B 953     2769   2545   2894    -76    422    -22
ATOM    811  C   LYS B 953     123.906  57.079   4.385  1.00 18.68           C  
ANISOU  811  C   LYS B 953     2358   2213   2526    -60    359    -21
ATOM    812  O   LYS B 953     125.098  57.339   4.228  1.00 23.35           O  
ANISOU  812  O   LYS B 953     2912   2812   3146    -46    364    -24
ATOM    813  CB  LYS B 953     123.671  55.576   6.359  1.00 19.87           C  
ANISOU  813  CB  LYS B 953     2620   2303   2623    -56    446     -3
ATOM    814  CG  LYS B 953     123.429  54.183   6.944  1.00 25.77           C  
ANISOU  814  CG  LYS B 953     3420   3017   3354    -64    512      8
ATOM    815  CD  LYS B 953     123.553  54.196   8.469  1.00 31.08           C  
ANISOU  815  CD  LYS B 953     4163   3685   3962    -39    524     23
ATOM    816  CE  LYS B 953     123.484  52.789   9.071  1.00 32.38           C  
ANISOU  816  CE  LYS B 953     4378   3821   4102    -40    598     42
ATOM    817  NZ  LYS B 953     122.187  52.140   8.805  1.00 37.29           N1+
ANISOU  817  NZ  LYS B 953     5029   4424   4716    -47    601     65
ATOM    818  H   LYS B 953     125.365  54.882   4.213  1.00  0.00           H  
ATOM    819  HZ1 LYS B 953     122.178  51.218   9.206  1.00  0.00           H  
ATOM    820  HZ2 LYS B 953     121.437  52.672   9.215  1.00  0.00           H  
ATOM    821  HZ3 LYS B 953     122.036  52.052   7.815  1.00  0.00           H  
ATOM    822  N   LEU B 954     122.913  57.956   4.228  1.00 18.73           N  
ANISOU  822  N   LEU B 954     2371   2242   2501    -58    305    -14
ATOM    823  CA  LEU B 954     123.075  59.367   3.889  1.00 18.40           C  
ANISOU  823  CA  LEU B 954     2302   2235   2451    -43    250     -3
ATOM    824  C   LEU B 954     123.081  60.175   5.195  1.00 20.11           C  
ANISOU  824  C   LEU B 954     2570   2437   2631    -28    238     16
ATOM    825  O   LEU B 954     122.133  60.043   5.971  1.00 20.87           O  
ANISOU  825  O   LEU B 954     2716   2524   2688    -30    236     20
ATOM    826  CB  LEU B 954     121.899  59.758   2.961  1.00 17.05           C  
ANISOU  826  CB  LEU B 954     2106   2104   2266    -53    204     -9
ATOM    827  CG  LEU B 954     121.706  61.259   2.628  1.00 17.46           C  
ANISOU  827  CG  LEU B 954     2146   2194   2293    -40    150     11
ATOM    828  CD1 LEU B 954     122.991  61.983   2.163  1.00 18.77           C  
ANISOU  828  CD1 LEU B 954     2266   2379   2485    -20    136     26
ATOM    829  CD2 LEU B 954     120.536  61.440   1.636  1.00 21.98           C  
ANISOU  829  CD2 LEU B 954     2697   2806   2845    -51    117     -2
ATOM    830  H   LEU B 954     121.975  57.678   4.506  1.00  0.00           H  
ATOM    831  N   ILE B 955     124.125  60.978   5.420  1.00 14.70           N  
ANISOU  831  N   ILE B 955     1871   1749   1963    -10    230     27
ATOM    832  CA  ILE B 955     124.293  61.781   6.626  1.00 18.38           C  
ANISOU  832  CA  ILE B 955     2381   2193   2407     -1    224     36
ATOM    833  C   ILE B 955     124.061  63.259   6.247  1.00 19.75           C  
ANISOU  833  C   ILE B 955     2537   2389   2576      0    174     60
ATOM    834  O   ILE B 955     124.736  63.797   5.361  1.00 16.78           O  
ANISOU  834  O   ILE B 955     2114   2032   2227     14    157     76
ATOM    835  CB  ILE B 955     125.725  61.646   7.230  1.00 22.21           C  
ANISOU  835  CB  ILE B 955     2872   2643   2923     16    262     29
ATOM    836  CG1 ILE B 955     126.250  60.189   7.274  1.00 24.05           C  
ANISOU  836  CG1 ILE B 955     3105   2861   3169     14    320      9
ATOM    837  CG2 ILE B 955     125.831  62.299   8.623  1.00 17.43           C  
ANISOU  837  CG2 ILE B 955     2319   2008   2294     18    261     24
ATOM    838  CD1 ILE B 955     125.466  59.236   8.179  1.00 21.50           C  
ANISOU  838  CD1 ILE B 955     2840   2529   2799      0    344      2
ATOM    839  H   ILE B 955     124.873  61.078   4.736  1.00  0.00           H  
ATOM    840  N   MET B 956     123.098  63.880   6.928  1.00 17.70           N  
ANISOU  840  N   MET B 956     2311   2134   2280    -11    151     64
ATOM    841  CA  MET B 956     122.694  65.273   6.789  1.00 17.79           C  
ANISOU  841  CA  MET B 956     2307   2166   2282    -15    112     89
ATOM    842  C   MET B 956     122.812  65.965   8.154  1.00 16.01           C  
ANISOU  842  C   MET B 956     2121   1911   2050    -23    111     88
ATOM    843  O   MET B 956     122.924  65.306   9.192  1.00 19.16           O  
ANISOU  843  O   MET B 956     2558   2286   2433    -27    130     62
ATOM    844  CB  MET B 956     121.226  65.325   6.314  1.00 16.46           C  
ANISOU  844  CB  MET B 956     2128   2044   2079    -28     83     88
ATOM    845  CG  MET B 956     120.985  64.716   4.926  1.00 17.53           C  
ANISOU  845  CG  MET B 956     2225   2213   2223    -26     80     78
ATOM    846  SD  MET B 956     119.233  64.517   4.500  1.00 19.41           S  
ANISOU  846  SD  MET B 956     2463   2488   2422    -39     57     63
ATOM    847  CE  MET B 956     118.793  63.114   5.565  1.00 18.96           C  
ANISOU  847  CE  MET B 956     2459   2386   2356    -39     92     45
ATOM    848  H   MET B 956     122.584  63.372   7.649  1.00  0.00           H  
ATOM    849  N   GLU B 957     122.761  67.300   8.139  1.00 16.49           N  
ANISOU  849  N   GLU B 957     2170   1975   2118    -29     90    115
ATOM    850  CA  GLU B 957     122.643  68.134   9.335  1.00 16.89           C  
ANISOU  850  CA  GLU B 957     2252   2000   2166    -49     86    109
ATOM    851  C   GLU B 957     121.307  67.885  10.068  1.00 16.00           C  
ANISOU  851  C   GLU B 957     2155   1916   2006    -68     69     84
ATOM    852  O   GLU B 957     120.274  67.719   9.417  1.00 15.64           O  
ANISOU  852  O   GLU B 957     2092   1914   1933    -67     52     87
ATOM    853  CB  GLU B 957     122.831  69.619   8.944  1.00 20.34           C  
ANISOU  853  CB  GLU B 957     2673   2431   2623    -56     73    150
ATOM    854  CG  GLU B 957     121.994  70.074   7.729  1.00 22.43           C  
ANISOU  854  CG  GLU B 957     2906   2756   2858    -63     45    177
ATOM    855  CD  GLU B 957     122.105  71.557   7.408  1.00 29.18           C  
ANISOU  855  CD  GLU B 957     3752   3606   3728    -72     40    225
ATOM    856  OE1 GLU B 957     122.984  72.249   7.960  1.00 24.25           O  
ANISOU  856  OE1 GLU B 957     3152   2923   3139    -83     57    229
ATOM    857  OE2 GLU B 957     121.353  72.025   6.529  1.00 21.53           O1-
ANISOU  857  OE2 GLU B 957     2754   2690   2736    -68     22    258
ATOM    858  H   GLU B 957     122.642  67.776   7.256  1.00  0.00           H  
ATOM    859  N   PHE B 958     121.353  67.871  11.405  1.00 16.53           N  
ANISOU  859  N   PHE B 958     2432   1957   1889   -161    117   -300
ATOM    860  CA  PHE B 958     120.167  67.866  12.259  1.00 16.66           C  
ANISOU  860  CA  PHE B 958     2482   2008   1837   -201     66   -284
ATOM    861  C   PHE B 958     119.729  69.314  12.528  1.00 17.41           C  
ANISOU  861  C   PHE B 958     2567   2081   1964   -201     26   -267
ATOM    862  O   PHE B 958     120.572  70.134  12.905  1.00 17.43           O  
ANISOU  862  O   PHE B 958     2570   2040   2011   -208     51   -305
ATOM    863  CB  PHE B 958     120.460  67.079  13.556  1.00 16.86           C  
ANISOU  863  CB  PHE B 958     2560   2055   1789   -259     88   -340
ATOM    864  CG  PHE B 958     119.448  67.216  14.683  1.00 16.53           C  
ANISOU  864  CG  PHE B 958     2548   2055   1677   -304     28   -320
ATOM    865  CD1 PHE B 958     118.135  66.721  14.532  1.00 18.59           C  
ANISOU  865  CD1 PHE B 958     2801   2352   1910   -298    -23   -249
ATOM    866  CD2 PHE B 958     119.799  67.880  15.878  1.00 20.41           C  
ANISOU  866  CD2 PHE B 958     3068   2552   2133   -356     26   -377
ATOM    867  CE1 PHE B 958     117.221  66.857  15.569  1.00 22.12           C  
ANISOU  867  CE1 PHE B 958     3264   2837   2302   -336    -82   -218
ATOM    868  CE2 PHE B 958     118.874  67.990  16.907  1.00 19.70           C  
ANISOU  868  CE2 PHE B 958     2997   2512   1975   -400    -36   -354
ATOM    869  CZ  PHE B 958     117.593  67.478  16.754  1.00 21.47           C  
ANISOU  869  CZ  PHE B 958     3209   2771   2176   -387    -94   -267
ATOM    870  H   PHE B 958     122.225  68.063  11.876  1.00  0.00           H  
ATOM    871  N   LEU B 959     118.441  69.600  12.329  1.00 15.91           N  
ANISOU  871  N   LEU B 959     2365   1918   1763   -195    -27   -213
ATOM    872  CA  LEU B 959     117.823  70.902  12.562  1.00 20.42           C  
ANISOU  872  CA  LEU B 959     2921   2473   2361   -199    -66   -191
ATOM    873  C   LEU B 959     116.821  70.728  13.728  1.00 14.83           C  
ANISOU  873  C   LEU B 959     2242   1797   1596   -246   -114   -189
ATOM    874  O   LEU B 959     115.743  70.172  13.492  1.00 18.44           O  
ANISOU  874  O   LEU B 959     2691   2286   2027   -244   -150   -144
ATOM    875  CB  LEU B 959     117.121  71.374  11.264  1.00 14.59           C  
ANISOU  875  CB  LEU B 959     2138   1744   1660   -159    -88   -134
ATOM    876  CG  LEU B 959     118.077  71.907  10.164  1.00 20.27           C  
ANISOU  876  CG  LEU B 959     2818   2439   2442   -117    -59   -117
ATOM    877  CD1 LEU B 959     118.888  70.794   9.477  1.00 22.80           C  
ANISOU  877  CD1 LEU B 959     3135   2754   2774    -97    -13   -141
ATOM    878  CD2 LEU B 959     117.330  72.764   9.125  1.00 20.31           C  
ANISOU  878  CD2 LEU B 959     2781   2479   2455    -91    -85    -64
ATOM    879  H   LEU B 959     117.816  68.868  11.984  1.00  0.00           H  
ATOM    880  N   PRO B 960     117.174  71.176  14.962  1.00 15.33           N  
ANISOU  880  N   PRO B 960     2331   1850   1642   -289   -112   -240
ATOM    881  CA  PRO B 960     116.347  70.977  16.175  1.00 20.74           C  
ANISOU  881  CA  PRO B 960     3041   2581   2255   -343   -161   -243
ATOM    882  C   PRO B 960     114.864  71.391  16.115  1.00 19.78           C  
ANISOU  882  C   PRO B 960     2893   2477   2146   -339   -228   -178
ATOM    883  O   PRO B 960     114.048  70.793  16.816  1.00 23.68           O  
ANISOU  883  O   PRO B 960     3396   3018   2582   -371   -276   -151
ATOM    884  CB  PRO B 960     117.089  71.763  17.269  1.00 23.23           C  
ANISOU  884  CB  PRO B 960     3375   2875   2574   -390   -142   -323
ATOM    885  CG  PRO B 960     118.540  71.749  16.832  1.00 27.13           C  
ANISOU  885  CG  PRO B 960     3862   3307   3136   -362    -68   -368
ATOM    886  CD  PRO B 960     118.449  71.814  15.313  1.00 15.99           C  
ANISOU  886  CD  PRO B 960     2415   1878   1782   -293    -63   -300
ATOM    887  N   SER B 961     114.536  72.400  15.301  1.00 20.12           N  
ANISOU  887  N   SER B 961     2898   2484   2261   -303   -231   -151
ATOM    888  CA  SER B 961     113.178  72.904  15.098  1.00 17.89           C  
ANISOU  888  CA  SER B 961     2584   2212   2001   -299   -283    -98
ATOM    889  C   SER B 961     112.241  71.920  14.359  1.00 19.95           C  
ANISOU  889  C   SER B 961     2824   2496   2259   -272   -296    -44
ATOM    890  O   SER B 961     111.023  72.081  14.450  1.00 20.38           O  
ANISOU  890  O   SER B 961     2849   2559   2335   -272   -336     -3
ATOM    891  CB  SER B 961     113.286  74.235  14.333  1.00 24.31           C  
ANISOU  891  CB  SER B 961     3362   2984   2888   -277   -274    -88
ATOM    892  OG  SER B 961     114.008  75.192  15.096  1.00 22.84           O  
ANISOU  892  OG  SER B 961     3188   2766   2724   -308   -265   -134
ATOM    893  H   SER B 961     115.254  72.907  14.806  1.00  0.00           H  
ATOM    894  HG  SER B 961     114.049  76.009  14.584  1.00  0.00           H  
ATOM    895  N   GLY B 962     112.804  70.919  13.665  1.00 15.99           N  
ANISOU  895  N   GLY B 962     2332   2001   1741   -252   -260    -48
ATOM    896  CA  GLY B 962     112.057  69.967  12.844  1.00 16.99           C  
ANISOU  896  CA  GLY B 962     2438   2142   1873   -233   -264     -8
ATOM    897  C   GLY B 962     111.577  70.650  11.555  1.00 15.79           C  
ANISOU  897  C   GLY B 962     2238   1979   1781   -196   -253      7
ATOM    898  O   GLY B 962     112.180  71.620  11.083  1.00 17.38           O  
ANISOU  898  O   GLY B 962     2428   2168   2007   -180   -236     -6
ATOM    899  H   GLY B 962     113.815  70.841  13.638  1.00  0.00           H  
ATOM    900  N   SER B 963     110.506  70.115  10.965  1.00 15.47           N  
ANISOU  900  N   SER B 963     2168   1943   1765   -186   -261     37
ATOM    901  CA  SER B 963     109.855  70.682   9.792  1.00 16.68           C  
ANISOU  901  CA  SER B 963     2273   2095   1969   -162   -247     38
ATOM    902  C   SER B 963     108.863  71.794  10.182  1.00 20.19           C  
ANISOU  902  C   SER B 963     2689   2532   2449   -169   -279     59
ATOM    903  O   SER B 963     108.634  72.039  11.371  1.00 14.63           O  
ANISOU  903  O   SER B 963     1997   1823   1736   -192   -319     77
ATOM    904  CB  SER B 963     109.210  69.530   8.990  1.00 17.08           C  
ANISOU  904  CB  SER B 963     2297   2144   2047   -151   -227     44
ATOM    905  OG  SER B 963     108.075  68.988   9.639  1.00 18.35           O  
ANISOU  905  OG  SER B 963     2435   2290   2247   -160   -254     84
ATOM    906  H   SER B 963     109.990  69.343  11.410  1.00  0.00           H  
ATOM    907  HG  SER B 963     108.382  68.580  10.488  1.00  0.00           H  
ATOM    908  N   LEU B 964     108.223  72.412   9.178  1.00 12.22           N  
ANISOU  908  N   LEU B 964     1637   1528   1475   -153   -259     53
ATOM    909  CA  LEU B 964     107.056  73.276   9.371  1.00 16.44           C  
ANISOU  909  CA  LEU B 964     2134   2055   2055   -159   -278     70
ATOM    910  C   LEU B 964     105.907  72.554  10.105  1.00 22.61           C  
ANISOU  910  C   LEU B 964     2894   2818   2876   -169   -310    101
ATOM    911  O   LEU B 964     105.174  73.205  10.846  1.00 16.25           O  
ANISOU  911  O   LEU B 964     2066   2003   2104   -180   -340    122
ATOM    912  CB  LEU B 964     106.521  73.806   8.020  1.00 16.48           C  
ANISOU  912  CB  LEU B 964     2093   2082   2087   -146   -241     51
ATOM    913  CG  LEU B 964     107.382  74.834   7.259  1.00 14.52           C  
ANISOU  913  CG  LEU B 964     1848   1863   1805   -137   -218     42
ATOM    914  CD1 LEU B 964     106.703  75.182   5.921  1.00 18.06           C  
ANISOU  914  CD1 LEU B 964     2246   2353   2260   -132   -182     21
ATOM    915  CD2 LEU B 964     107.673  76.121   8.058  1.00 13.45           C  
ANISOU  915  CD2 LEU B 964     1725   1711   1672   -145   -236     65
ATOM    916  H   LEU B 964     108.499  72.211   8.220  1.00  0.00           H  
ATOM    917  N   LYS B 965     105.777  71.230   9.920  1.00 20.98           N  
ANISOU  917  N   LYS B 965     2690   2605   2675   -164   -303    112
ATOM    918  CA  LYS B 965     104.771  70.421  10.603  1.00 19.62           C  
ANISOU  918  CA  LYS B 965     2492   2412   2550   -170   -335    162
ATOM    919  C   LYS B 965     105.013  70.328  12.124  1.00 23.00           C  
ANISOU  919  C   LYS B 965     2952   2854   2930   -196   -395    201
ATOM    920  O   LYS B 965     104.042  70.357  12.881  1.00 22.60           O  
ANISOU  920  O   LYS B 965     2870   2798   2918   -206   -441    250
ATOM    921  CB  LYS B 965     104.622  69.045   9.908  1.00 29.91           C  
ANISOU  921  CB  LYS B 965     3788   3700   3877   -159   -306    173
ATOM    922  CG  LYS B 965     103.572  68.095  10.523  1.00 41.08           C  
ANISOU  922  CG  LYS B 965     5157   5079   5371   -157   -326    236
ATOM    923  CD  LYS B 965     102.151  68.682  10.535  1.00 61.42           C  
ANISOU  923  CD  LYS B 965     7659   7619   8057   -142   -297    218
ATOM    924  CE  LYS B 965     101.135  67.805  11.278  1.00 85.48           C  
ANISOU  924  CE  LYS B 965    10652  10625  11200   -138   -330    294
ATOM    925  NZ  LYS B 965      99.773  68.351  11.163  1.00 60.60           N1+
ANISOU  925  NZ  LYS B 965     7420   7425   8178   -123   -287    269
ATOM    926  H   LYS B 965     106.464  70.733   9.365  1.00  0.00           H  
ATOM    927  HZ1 LYS B 965      99.748  69.345  11.365  1.00  0.00           H  
ATOM    928  HZ2 LYS B 965      99.429  68.214  10.228  1.00  0.00           H  
ATOM    929  HZ3 LYS B 965      99.173  67.868  11.808  1.00  0.00           H  
ATOM    930  N   GLU B 966     106.280  70.266  12.555  1.00 20.68           N  
ANISOU  930  N   GLU B 966     2717   2584   2556   -212   -396    176
ATOM    931  CA  GLU B 966     106.646  70.391  13.965  1.00 26.47           C  
ANISOU  931  CA  GLU B 966     3483   3343   3230   -249   -447    191
ATOM    932  C   GLU B 966     106.532  71.852  14.425  1.00 23.57           C  
ANISOU  932  C   GLU B 966     3110   2972   2870   -264   -466    164
ATOM    933  O   GLU B 966     105.954  72.117  15.478  1.00 23.14           O  
ANISOU  933  O   GLU B 966     3046   2933   2810   -293   -520    184
ATOM    934  CB  GLU B 966     108.077  69.870  14.252  1.00 26.22           C  
ANISOU  934  CB  GLU B 966     3513   3336   3113   -266   -428    161
ATOM    935  CG  GLU B 966     108.252  68.336  14.239  1.00 31.56           C  
ANISOU  935  CG  GLU B 966     4200   4024   3768   -264   -418    199
ATOM    936  CD  GLU B 966     108.142  67.705  12.859  1.00 30.31           C  
ANISOU  936  CD  GLU B 966     4015   3832   3666   -226   -363    189
ATOM    937  OE1 GLU B 966     108.886  68.150  11.961  1.00 25.45           O  
ANISOU  937  OE1 GLU B 966     3407   3211   3052   -209   -321    134
ATOM    938  OE2 GLU B 966     107.325  66.776  12.709  1.00 30.46           O1-
ANISOU  938  OE2 GLU B 966     4001   3835   3736   -215   -363    237
ATOM    939  H   GLU B 966     107.040  70.231  11.886  1.00  0.00           H  
ATOM    940  N   TYR B 967     107.133  72.763  13.653  1.00 16.26           N  
ANISOU  940  N   TYR B 967     2187   2030   1960   -246   -423    123
ATOM    941  CA  TYR B 967     107.412  74.124  14.085  1.00 19.38           C  
ANISOU  941  CA  TYR B 967     2584   2415   2365   -261   -428     99
ATOM    942  C   TYR B 967     106.173  75.029  14.128  1.00 20.06           C  
ANISOU  942  C   TYR B 967     2615   2487   2518   -260   -446    121
ATOM    943  O   TYR B 967     105.973  75.708  15.137  1.00 22.50           O  
ANISOU  943  O   TYR B 967     2918   2793   2837   -288   -480    118
ATOM    944  CB  TYR B 967     108.519  74.719  13.200  1.00 17.83           C  
ANISOU  944  CB  TYR B 967     2405   2204   2164   -240   -374     64
ATOM    945  CG  TYR B 967     109.112  76.025  13.698  1.00 15.70           C  
ANISOU  945  CG  TYR B 967     2136   1910   1916   -252   -367     45
ATOM    946  CD1 TYR B 967     110.016  76.009  14.780  1.00 20.65           C  
ANISOU  946  CD1 TYR B 967     2799   2526   2519   -285   -373      7
ATOM    947  CD2 TYR B 967     108.787  77.249  13.077  1.00 13.90           C  
ANISOU  947  CD2 TYR B 967     1871   1670   1737   -235   -348     62
ATOM    948  CE1 TYR B 967     110.609  77.204  15.227  1.00 26.03           C  
ANISOU  948  CE1 TYR B 967     3477   3172   3241   -296   -358    -12
ATOM    949  CE2 TYR B 967     109.377  78.446  13.528  1.00 19.98           C  
ANISOU  949  CE2 TYR B 967     2639   2411   2540   -246   -336     55
ATOM    950  CZ  TYR B 967     110.290  78.425  14.601  1.00 22.66           C  
ANISOU  950  CZ  TYR B 967     3011   2726   2871   -275   -340     18
ATOM    951  OH  TYR B 967     110.872  79.581  15.033  1.00 24.33           O  
ANISOU  951  OH  TYR B 967     3215   2894   3134   -287   -321      9
ATOM    952  H   TYR B 967     107.607  72.453  12.805  1.00  0.00           H  
ATOM    953  HH  TYR B 967     111.563  79.415  15.683  1.00  0.00           H  
ATOM    954  N   LEU B 968     105.363  75.053  13.058  1.00 19.70           N  
ANISOU  954  N   LEU B 968     2529   2435   2521   -231   -419    134
ATOM    955  CA  LEU B 968     104.286  76.038  12.915  1.00 21.02           C  
ANISOU  955  CA  LEU B 968     2641   2590   2755   -231   -421    146
ATOM    956  C   LEU B 968     103.196  75.985  13.988  1.00 21.32           C  
ANISOU  956  C   LEU B 968     2645   2623   2831   -252   -480    182
ATOM    957  O   LEU B 968     102.858  77.051  14.509  1.00 22.74           O  
ANISOU  957  O   LEU B 968     2800   2795   3044   -269   -499    182
ATOM    958  CB  LEU B 968     103.630  75.989  11.527  1.00 17.49           C  
ANISOU  958  CB  LEU B 968     2153   2144   2349   -204   -372    139
ATOM    959  CG  LEU B 968     104.536  76.441  10.383  1.00 21.61           C  
ANISOU  959  CG  LEU B 968     2689   2685   2834   -189   -320    109
ATOM    960  CD1 LEU B 968     103.816  76.232   9.054  1.00 14.87           C  
ANISOU  960  CD1 LEU B 968     1792   1848   2009   -173   -275     90
ATOM    961  CD2 LEU B 968     104.998  77.895  10.535  1.00 20.38           C  
ANISOU  961  CD2 LEU B 968     2537   2529   2677   -198   -313    112
ATOM    962  H   LEU B 968     105.483  74.387  12.297  1.00  0.00           H  
ATOM    963  N   PRO B 969     102.689  74.788  14.360  1.00 20.43           N  
ANISOU  963  N   PRO B 969     2527   2517   2718   -251   -512    218
ATOM    964  CA  PRO B 969     101.659  74.722  15.405  1.00 23.72           C  
ANISOU  964  CA  PRO B 969     2898   2935   3177   -268   -576    268
ATOM    965  C   PRO B 969     102.104  75.274  16.762  1.00 27.39           C  
ANISOU  965  C   PRO B 969     3385   3426   3592   -312   -631    259
ATOM    966  O   PRO B 969     101.272  75.766  17.522  1.00 30.38           O  
ANISOU  966  O   PRO B 969     3718   3809   4016   -331   -680    285
ATOM    967  CB  PRO B 969     101.322  73.232  15.493  1.00 28.56           C  
ANISOU  967  CB  PRO B 969     3508   3554   3787   -259   -597    321
ATOM    968  CG  PRO B 969     101.672  72.682  14.129  1.00 27.56           C  
ANISOU  968  CG  PRO B 969     3393   3407   3669   -226   -524    291
ATOM    969  CD  PRO B 969     102.916  73.467  13.767  1.00 24.79           C  
ANISOU  969  CD  PRO B 969     3095   3070   3251   -231   -489    228
ATOM    970  N   LYS B 970     103.411  75.192  17.026  1.00 25.21           N  
ANISOU  970  N   LYS B 970     3175   3168   3234   -330   -619    216
ATOM    971  CA  LYS B 970     104.002  75.582  18.293  1.00 27.65           C  
ANISOU  971  CA  LYS B 970     3511   3504   3488   -380   -661    188
ATOM    972  C   LYS B 970     104.432  77.049  18.307  1.00 26.81           C  
ANISOU  972  C   LYS B 970     3403   3366   3415   -391   -632    138
ATOM    973  O   LYS B 970     104.759  77.547  19.383  1.00 27.59           O  
ANISOU  973  O   LYS B 970     3511   3476   3495   -435   -662    105
ATOM    974  CB  LYS B 970     105.209  74.673  18.574  1.00 37.84           C  
ANISOU  974  CB  LYS B 970     4870   4826   4679   -398   -652    158
ATOM    975  CG  LYS B 970     104.813  73.197  18.735  1.00 50.53           C  
ANISOU  975  CG  LYS B 970     6482   6473   6244   -397   -683    218
ATOM    976  CD  LYS B 970     106.007  72.238  18.669  1.00 58.27           C  
ANISOU  976  CD  LYS B 970     7528   7475   7137   -404   -649    188
ATOM    977  CE  LYS B 970     106.699  72.051  20.023  1.00 73.32           C  
ANISOU  977  CE  LYS B 970     9474   9442   8941   -467   -686    154
ATOM    978  NZ  LYS B 970     107.663  70.939  19.992  1.00 85.57           N1+
ANISOU  978  NZ  LYS B 970    11083  11025  10405   -478   -652    135
ATOM    979  H   LYS B 970     104.052  74.848  16.322  1.00  0.00           H  
ATOM    980  HZ1 LYS B 970     108.087  70.831  20.898  1.00  0.00           H  
ATOM    981  HZ2 LYS B 970     107.199  70.078  19.758  1.00  0.00           H  
ATOM    982  HZ3 LYS B 970     108.388  71.114  19.319  1.00  0.00           H  
ATOM    983  N   ASN B 971     104.465  77.713  17.146  1.00 25.01           N  
ANISOU  983  N   ASN B 971     3163   3102   3236   -354   -572    132
ATOM    984  CA  ASN B 971     105.069  79.042  17.036  1.00 22.91           C  
ANISOU  984  CA  ASN B 971     2898   2805   3002   -362   -538    100
ATOM    985  C   ASN B 971     104.158  80.037  16.331  1.00 24.65           C  
ANISOU  985  C   ASN B 971     3062   3003   3299   -343   -513    123
ATOM    986  O   ASN B 971     104.648  81.093  15.936  1.00 27.57           O  
ANISOU  986  O   ASN B 971     3431   3349   3696   -340   -470    113
ATOM    987  CB  ASN B 971     106.452  78.970  16.357  1.00 25.43           C  
ANISOU  987  CB  ASN B 971     3266   3109   3285   -343   -481     69
ATOM    988  CG  ASN B 971     107.480  78.225  17.202  1.00 27.50           C  
ANISOU  988  CG  ASN B 971     3583   3388   3477   -370   -494     30
ATOM    989  OD1 ASN B 971     108.113  78.809  18.083  1.00 26.99           O  
ANISOU  989  OD1 ASN B 971     3543   3350   3359   -359   -496     38
ATOM    990  ND2 ASN B 971     107.642  76.934  16.964  1.00 25.00           N  
ANISOU  990  ND2 ASN B 971     3280   3055   3161   -410   -498    -16
ATOM    991  H   ASN B 971     104.159  77.264  16.288  1.00  0.00           H  
ATOM    992 HD22 ASN B 971     108.304  76.395  17.494  1.00  0.00           H  
ATOM    993 HD21 ASN B 971     107.088  76.479  16.236  1.00  0.00           H  
ATOM    994  N   LYS B 972     102.849  79.751  16.240  1.00 29.73           N  
ANISOU  994  N   LYS B 972     3655   3655   3985   -334   -536    157
ATOM    995  CA  LYS B 972     101.850  80.635  15.626  1.00 36.26           C  
ANISOU  995  CA  LYS B 972     4422   4466   4889   -321   -507    172
ATOM    996  C   LYS B 972     101.986  82.107  16.028  1.00 29.14           C  
ANISOU  996  C   LYS B 972     3506   3541   4024   -346   -495    159
ATOM    997  O   LYS B 972     101.910  82.983  15.171  1.00 32.20           O  
ANISOU  997  O   LYS B 972     3874   3919   4438   -333   -440    163
ATOM    998  CB  LYS B 972     100.428  80.199  16.009  1.00 34.90           C  
ANISOU  998  CB  LYS B 972     4185   4293   4780   -320   -547    207
ATOM    999  CG  LYS B 972      99.943  78.938  15.304  1.00 41.02           C  
ANISOU  999  CG  LYS B 972     4950   5072   5561   -288   -537    227
ATOM   1000  CD  LYS B 972      98.430  78.754  15.466  1.00 36.87           C  
ANISOU 1000  CD  LYS B 972     4343   4528   5136   -280   -559    266
ATOM   1001  CE  LYS B 972      97.983  77.409  14.890  1.00 51.19           C  
ANISOU 1001  CE  LYS B 972     6145   6333   6972   -250   -548    290
ATOM   1002  NZ  LYS B 972      96.522  77.236  14.863  1.00 52.13           N1+
ANISOU 1002  NZ  LYS B 972     6174   6417   7213   -235   -552    327
ATOM   1003  H   LYS B 972     102.523  78.862  16.589  1.00  0.00           H  
ATOM   1004  HZ1 LYS B 972      96.297  76.339  14.467  1.00  0.00           H  
ATOM   1005  HZ2 LYS B 972      96.143  77.271  15.794  1.00  0.00           H  
ATOM   1006  HZ3 LYS B 972      96.081  77.947  14.305  1.00  0.00           H  
ATOM   1007  N   ASN B 973     102.211  82.344  17.327  1.00 26.68           N  
ANISOU 1007  N   ASN B 973     3198   3226   3710   -387   -546    145
ATOM   1008  CA  ASN B 973     102.307  83.700  17.863  1.00 30.72           C  
ANISOU 1008  CA  ASN B 973     3689   3709   4275   -417   -536    129
ATOM   1009  C   ASN B 973     103.528  84.477  17.339  1.00 38.56           C  
ANISOU 1009  C   ASN B 973     4719   4670   5260   -411   -475    113
ATOM   1010  O   ASN B 973     103.465  85.696  17.190  1.00 40.73           O  
ANISOU 1010  O   ASN B 973     4967   4915   5593   -420   -440    121
ATOM   1011  CB  ASN B 973     102.324  83.678  19.402  1.00 39.70           C  
ANISOU 1011  CB  ASN B 973     4821   4854   5408   -471   -605    103
ATOM   1012  CG  ASN B 973     102.173  85.092  19.970  1.00 44.80           C  
ANISOU 1012  CG  ASN B 973     5430   5463   6128   -507   -595     83
ATOM   1013  OD1 ASN B 973     101.245  85.818  19.613  1.00 51.96           O  
ANISOU 1013  OD1 ASN B 973     6360   6352   7029   -548   -600     35
ATOM   1014  ND2 ASN B 973     103.088  85.514  20.825  1.00 39.66           N  
ANISOU 1014  ND2 ASN B 973     4719   4797   5552   -495   -574    115
ATOM   1015  H   ASN B 973     102.310  81.565  17.965  1.00  0.00           H  
ATOM   1016 HD22 ASN B 973     103.040  86.455  21.188  1.00  0.00           H  
ATOM   1017 HD21 ASN B 973     103.856  84.920  21.106  1.00  0.00           H  
ATOM   1018  N   LYS B 974     104.624  83.762  17.093  1.00 30.63           N  
ANISOU 1018  N   LYS B 974     3772   3672   4194   -396   -460     96
ATOM   1019  CA  LYS B 974     105.869  84.345  16.624  1.00 33.02           C  
ANISOU 1019  CA  LYS B 974     4106   3941   4498   -386   -404     88
ATOM   1020  C   LYS B 974     105.876  84.554  15.101  1.00 33.12           C  
ANISOU 1020  C   LYS B 974     4112   3969   4503   -340   -351    130
ATOM   1021  O   LYS B 974     106.576  85.447  14.620  1.00 31.16           O  
ANISOU 1021  O   LYS B 974     3864   3697   4277   -329   -304    151
ATOM   1022  CB  LYS B 974     106.993  83.420  17.109  1.00 47.17           C  
ANISOU 1022  CB  LYS B 974     5955   5734   6231   -393   -413     45
ATOM   1023  CG  LYS B 974     108.403  83.719  16.585  1.00 54.41           C  
ANISOU 1023  CG  LYS B 974     6903   6615   7154   -373   -355     38
ATOM   1024  CD  LYS B 974     109.368  82.577  16.913  1.00 47.72           C  
ANISOU 1024  CD  LYS B 974     6107   5778   6244   -377   -359     -7
ATOM   1025  CE  LYS B 974     109.361  82.211  18.402  1.00 57.59           C  
ANISOU 1025  CE  LYS B 974     7373   7040   7468   -434   -406    -67
ATOM   1026  NZ  LYS B 974     110.444  81.282  18.742  1.00 65.05           N1+
ANISOU 1026  NZ  LYS B 974     8369   7992   8353   -446   -393   -122
ATOM   1027  H   LYS B 974     104.587  82.750  17.145  1.00  0.00           H  
ATOM   1028  HZ1 LYS B 974     110.187  80.343  18.482  1.00  0.00           H  
ATOM   1029  HZ2 LYS B 974     111.290  81.549  18.268  1.00  0.00           H  
ATOM   1030  HZ3 LYS B 974     110.608  81.309  19.734  1.00  0.00           H  
ATOM   1031  N   ILE B 975     105.126  83.728  14.367  1.00 25.66           N  
ANISOU 1031  N   ILE B 975     3154   3066   3529   -316   -356    142
ATOM   1032  CA  ILE B 975     105.206  83.664  12.915  1.00 25.87           C  
ANISOU 1032  CA  ILE B 975     3176   3124   3528   -280   -309    165
ATOM   1033  C   ILE B 975     103.937  84.301  12.332  1.00 29.48           C  
ANISOU 1033  C   ILE B 975     3575   3601   4022   -280   -286    184
ATOM   1034  O   ILE B 975     102.876  83.678  12.297  1.00 33.07           O  
ANISOU 1034  O   ILE B 975     4000   4068   4493   -279   -302    174
ATOM   1035  CB  ILE B 975     105.348  82.202  12.400  1.00 26.98           C  
ANISOU 1035  CB  ILE B 975     3342   3296   3612   -257   -317    149
ATOM   1036  CG1 ILE B 975     106.504  81.434  13.075  1.00 22.15           C  
ANISOU 1036  CG1 ILE B 975     2785   2668   2961   -262   -336    124
ATOM   1037  CG2 ILE B 975     105.533  82.154  10.875  1.00 27.85           C  
ANISOU 1037  CG2 ILE B 975     3444   3445   3690   -228   -270    161
ATOM   1038  CD1 ILE B 975     107.874  82.109  12.953  1.00 27.95           C  
ANISOU 1038  CD1 ILE B 975     3545   3375   3698   -256   -302    125
ATOM   1039  H   ILE B 975     104.493  83.083  14.824  1.00  0.00           H  
ATOM   1040  N   ASN B 976     104.059  85.557  11.907  1.00 24.18           N  
ANISOU 1040  N   ASN B 976     2885   2930   3372   -284   -244    213
ATOM   1041  CA  ASN B 976     102.973  86.296  11.266  1.00 25.94           C  
ANISOU 1041  CA  ASN B 976     3054   3180   3622   -290   -210    227
ATOM   1042  C   ASN B 976     103.019  86.143   9.739  1.00 28.68           C  
ANISOU 1042  C   ASN B 976     3393   3592   3909   -270   -162    235
ATOM   1043  O   ASN B 976     103.898  85.455   9.215  1.00 20.45           O  
ANISOU 1043  O   ASN B 976     2387   2573   2811   -249   -162    233
ATOM   1044  CB  ASN B 976     103.008  87.772  11.716  1.00 30.45           C  
ANISOU 1044  CB  ASN B 976     3599   3718   4249   -314   -189    259
ATOM   1045  CG  ASN B 976     104.256  88.558  11.293  1.00 34.56           C  
ANISOU 1045  CG  ASN B 976     4144   4232   4753   -306   -155    304
ATOM   1046  OD1 ASN B 976     105.090  88.102  10.513  1.00 33.46           O  
ANISOU 1046  OD1 ASN B 976     4033   4124   4555   -280   -145    315
ATOM   1047  ND2 ASN B 976     104.398  89.763  11.817  1.00 38.37           N  
ANISOU 1047  ND2 ASN B 976     4609   4670   5299   -327   -137    334
ATOM   1048  H   ASN B 976     104.962  86.012  11.927  1.00  0.00           H  
ATOM   1049 HD22 ASN B 976     105.207  90.322  11.590  1.00  0.00           H  
ATOM   1050 HD21 ASN B 976     103.715  90.128  12.465  1.00  0.00           H  
ATOM   1051  N   LEU B 977     102.098  86.829   9.048  1.00 25.49           N  
ANISOU 1051  N   LEU B 977     2943   3226   3516   -281   -119    239
ATOM   1052  CA  LEU B 977     101.952  86.740   7.597  1.00 29.37           C  
ANISOU 1052  CA  LEU B 977     3419   3796   3942   -273    -73    229
ATOM   1053  C   LEU B 977     103.234  87.089   6.847  1.00 21.82           C  
ANISOU 1053  C   LEU B 977     2492   2882   2917   -261    -59    276
ATOM   1054  O   LEU B 977     103.615  86.381   5.922  1.00 23.43           O  
ANISOU 1054  O   LEU B 977     2705   3142   3053   -247    -51    261
ATOM   1055  CB  LEU B 977     100.760  87.584   7.114  1.00 26.30           C  
ANISOU 1055  CB  LEU B 977     2971   3445   3575   -297    -21    221
ATOM   1056  CG  LEU B 977     100.588  87.642   5.581  1.00 28.52           C  
ANISOU 1056  CG  LEU B 977     3231   3826   3776   -304     35    203
ATOM   1057  CD1 LEU B 977     100.379  86.255   4.962  1.00 28.51           C  
ANISOU 1057  CD1 LEU B 977     3235   3846   3752   -290     31    137
ATOM   1058  CD2 LEU B 977      99.432  88.564   5.220  1.00 37.36           C  
ANISOU 1058  CD2 LEU B 977     4293   4981   4920   -335     94    188
ATOM   1059  H   LEU B 977     101.458  87.442   9.533  1.00  0.00           H  
ATOM   1060  N   LYS B 978     103.901  88.155   7.288  1.00 24.48           N  
ANISOU 1060  N   LYS B 978     2834   3187   3277   -266    -55    336
ATOM   1061  CA  LYS B 978     105.153  88.585   6.693  1.00 22.54           C  
ANISOU 1061  CA  LYS B 978     2606   2968   2987   -250    -42    399
ATOM   1062  C   LYS B 978     106.226  87.486   6.748  1.00 24.56           C  
ANISOU 1062  C   LYS B 978     2906   3205   3220   -222    -75    379
ATOM   1063  O   LYS B 978     106.913  87.253   5.754  1.00 20.07           O  
ANISOU 1063  O   LYS B 978     2342   2694   2589   -203    -68    402
ATOM   1064  CB  LYS B 978     105.621  89.850   7.415  1.00 30.83           C  
ANISOU 1064  CB  LYS B 978     3652   3959   4103   -260    -31    466
ATOM   1065  CG  LYS B 978     106.766  90.564   6.702  1.00 41.57           C  
ANISOU 1065  CG  LYS B 978     5011   5344   5438   -243     -9    557
ATOM   1066  CD  LYS B 978     107.137  91.864   7.421  1.00 50.30           C  
ANISOU 1066  CD  LYS B 978     6104   6375   6633   -256     11    624
ATOM   1067  CE  LYS B 978     107.798  92.876   6.479  1.00 71.77           C  
ANISOU 1067  CE  LYS B 978     8799   9144   9326   -248     47    742
ATOM   1068  NZ  LYS B 978     106.821  93.468   5.544  1.00 71.43           N1+
ANISOU 1068  NZ  LYS B 978     8718   9212   9210   -273     83    769
ATOM   1069  H   LYS B 978     103.548  88.669   8.081  1.00  0.00           H  
ATOM   1070  HZ1 LYS B 978     106.135  92.788   5.267  1.00  0.00           H  
ATOM   1071  HZ2 LYS B 978     106.344  94.237   5.984  1.00  0.00           H  
ATOM   1072  HZ3 LYS B 978     107.282  93.815   4.716  1.00  0.00           H  
ATOM   1073  N   GLN B 979     106.324  86.801   7.893  1.00 19.25           N  
ANISOU 1073  N   GLN B 979     2263   2459   2592   -222   -112    337
ATOM   1074  CA  GLN B 979     107.276  85.711   8.036  1.00 19.72           C  
ANISOU 1074  CA  GLN B 979     2364   2499   2629   -200   -136    314
ATOM   1075  C   GLN B 979     106.894  84.490   7.186  1.00 18.69           C  
ANISOU 1075  C   GLN B 979     2233   2427   2439   -188   -139    270
ATOM   1076  O   GLN B 979     107.782  83.849   6.621  1.00 19.83           O  
ANISOU 1076  O   GLN B 979     2397   2593   2542   -167   -140    268
ATOM   1077  CB  GLN B 979     107.466  85.326   9.514  1.00 18.93           C  
ANISOU 1077  CB  GLN B 979     2295   2320   2577   -212   -172    276
ATOM   1078  CG  GLN B 979     108.642  84.354   9.729  1.00 24.66           C  
ANISOU 1078  CG  GLN B 979     3063   3025   3278   -195   -185    252
ATOM   1079  CD  GLN B 979     109.951  84.928   9.186  1.00 27.61           C  
ANISOU 1079  CD  GLN B 979     3440   3393   3657   -172   -157    302
ATOM   1080  OE1 GLN B 979     110.465  85.921   9.699  1.00 28.11           O  
ANISOU 1080  OE1 GLN B 979     3503   3505   3671   -146   -147    315
ATOM   1081  NE2 GLN B 979     110.464  84.370   8.101  1.00 22.45           N  
ANISOU 1081  NE2 GLN B 979     2780   2679   3070   -181   -141    334
ATOM   1082  H   GLN B 979     105.695  87.002   8.665  1.00  0.00           H  
ATOM   1083 HE22 GLN B 979     111.310  84.732   7.697  1.00  0.00           H  
ATOM   1084 HE21 GLN B 979     109.990  83.589   7.660  1.00  0.00           H  
ATOM   1085  N   GLN B 980     105.590  84.212   7.073  1.00 16.69           N  
ANISOU 1085  N   GLN B 980     1953   2194   2194   -202   -136    233
ATOM   1086  CA  GLN B 980     105.085  83.154   6.204  1.00 20.40           C  
ANISOU 1086  CA  GLN B 980     2413   2710   2628   -196   -127    186
ATOM   1087  C   GLN B 980     105.452  83.410   4.735  1.00 23.63           C  
ANISOU 1087  C   GLN B 980     2803   3209   2966   -192    -93    197
ATOM   1088  O   GLN B 980     105.915  82.504   4.052  1.00 19.77           O  
ANISOU 1088  O   GLN B 980     2322   2755   2434   -180    -93    169
ATOM   1089  CB  GLN B 980     103.565  82.993   6.351  1.00 20.97           C  
ANISOU 1089  CB  GLN B 980     2445   2775   2747   -212   -119    147
ATOM   1090  CG  GLN B 980     103.126  82.464   7.725  1.00 16.87           C  
ANISOU 1090  CG  GLN B 980     1935   2181   2291   -215   -165    139
ATOM   1091  CD  GLN B 980     101.613  82.538   7.903  1.00 25.25           C  
ANISOU 1091  CD  GLN B 980     2942   3229   3419   -228   -156    120
ATOM   1092  OE1 GLN B 980     101.000  83.590   7.785  1.00 25.84           O  
ANISOU 1092  OE1 GLN B 980     2981   3317   3518   -244   -127    129
ATOM   1093  NE2 GLN B 980     100.970  81.422   8.190  1.00 26.23           N  
ANISOU 1093  NE2 GLN B 980     3056   3327   3582   -221   -175     97
ATOM   1094  H   GLN B 980     104.912  84.790   7.561  1.00  0.00           H  
ATOM   1095 HE22 GLN B 980      99.972  81.448   8.327  1.00  0.00           H  
ATOM   1096 HE21 GLN B 980     101.450  80.533   8.250  1.00  0.00           H  
ATOM   1097  N   LEU B 981     105.304  84.652   4.270  1.00 21.89           N  
ANISOU 1097  N   LEU B 981     2554   3034   2728   -206    -64    239
ATOM   1098  CA  LEU B 981     105.670  84.994   2.897  1.00 24.73           C  
ANISOU 1098  CA  LEU B 981     2891   3501   3003   -209    -37    261
ATOM   1099  C   LEU B 981     107.179  84.922   2.643  1.00 18.51           C  
ANISOU 1099  C   LEU B 981     2127   2720   2184   -182    -58    316
ATOM   1100  O   LEU B 981     107.580  84.495   1.564  1.00 22.80           O  
ANISOU 1100  O   LEU B 981     2658   3347   2657   -177    -54    313
ATOM   1101  CB  LEU B 981     105.108  86.363   2.499  1.00 26.49           C  
ANISOU 1101  CB  LEU B 981     3077   3780   3206   -235      0    304
ATOM   1102  CG  LEU B 981     103.575  86.462   2.563  1.00 26.05           C  
ANISOU 1102  CG  LEU B 981     2986   3726   3186   -264     31    241
ATOM   1103  CD1 LEU B 981     103.101  87.824   2.059  1.00 29.76           C  
ANISOU 1103  CD1 LEU B 981     3418   4267   3623   -295     78    282
ATOM   1104  CD2 LEU B 981     102.864  85.329   1.818  1.00 27.72           C  
ANISOU 1104  CD2 LEU B 981     3179   3977   3376   -271     48    146
ATOM   1105  H   LEU B 981     104.910  85.373   4.869  1.00  0.00           H  
ATOM   1106  N   LYS B 982     108.003  85.282   3.634  1.00 19.00           N  
ANISOU 1106  N   LYS B 982     2217   2697   2303   -166    -77    364
ATOM   1107  CA  LYS B 982     109.447  85.089   3.529  1.00 21.43           C  
ANISOU 1107  CA  LYS B 982     2542   2990   2608   -136    -90    409
ATOM   1108  C   LYS B 982     109.835  83.608   3.435  1.00 21.08           C  
ANISOU 1108  C   LYS B 982     2523   2940   2546   -121   -108    344
ATOM   1109  O   LYS B 982     110.681  83.272   2.609  1.00 17.52           O  
ANISOU 1109  O   LYS B 982     2065   2535   2055   -103   -111    361
ATOM   1110  CB  LYS B 982     110.185  85.753   4.689  1.00 23.11           C  
ANISOU 1110  CB  LYS B 982     2775   3100   2905   -127    -95    454
ATOM   1111  CG  LYS B 982     110.178  87.280   4.635  1.00 28.44           C  
ANISOU 1111  CG  LYS B 982     3421   3777   3607   -137    -71    542
ATOM   1112  CD  LYS B 982     110.836  87.822   5.899  1.00 31.91           C  
ANISOU 1112  CD  LYS B 982     3878   4094   4149   -134    -70    563
ATOM   1113  CE  LYS B 982     110.815  89.344   5.983  1.00 42.26           C  
ANISOU 1113  CE  LYS B 982     5159   5388   5509   -145    -42    651
ATOM   1114  NZ  LYS B 982     111.139  89.776   7.351  1.00 42.55           N1+
ANISOU 1114  NZ  LYS B 982     5211   5297   5658   -155    -39    635
ATOM   1115  H   LYS B 982     107.623  85.653   4.498  1.00  0.00           H  
ATOM   1116  HZ1 LYS B 982     111.129  90.779   7.416  1.00  0.00           H  
ATOM   1117  HZ2 LYS B 982     110.473  89.399   8.003  1.00  0.00           H  
ATOM   1118  HZ3 LYS B 982     112.055  89.450   7.607  1.00  0.00           H  
ATOM   1119  N   TYR B 983     109.189  82.736   4.221  1.00 20.85           N  
ANISOU 1119  N   TYR B 983     2518   2856   2546   -129   -122    277
ATOM   1120  CA  TYR B 983     109.353  81.289   4.039  1.00 17.67           C  
ANISOU 1120  CA  TYR B 983     2133   2454   2123   -119   -132    220
ATOM   1121  C   TYR B 983     108.925  80.816   2.652  1.00 17.68           C  
ANISOU 1121  C   TYR B 983     2101   2552   2064   -125   -114    187
ATOM   1122  O   TYR B 983     109.619  79.993   2.061  1.00 16.03           O  
ANISOU 1122  O   TYR B 983     1895   2370   1825   -112   -117    167
ATOM   1123  CB  TYR B 983     108.547  80.471   5.053  1.00 15.66           C  
ANISOU 1123  CB  TYR B 983     1901   2140   1906   -130   -149    167
ATOM   1124  CG  TYR B 983     108.960  80.560   6.503  1.00 14.94           C  
ANISOU 1124  CG  TYR B 983     1847   1967   1862   -133   -173    174
ATOM   1125  CD1 TYR B 983     110.226  81.041   6.897  1.00 15.34           C  
ANISOU 1125  CD1 TYR B 983     1919   1981   1929   -121   -171    204
ATOM   1126  CD2 TYR B 983     108.057  80.099   7.475  1.00 21.13           C  
ANISOU 1126  CD2 TYR B 983     2639   2711   2675   -150   -197    146
ATOM   1127  CE1 TYR B 983     110.562  81.090   8.261  1.00 19.40           C  
ANISOU 1127  CE1 TYR B 983     2463   2422   2483   -134   -187    190
ATOM   1128  CE2 TYR B 983     108.396  80.135   8.833  1.00 25.27           C  
ANISOU 1128  CE2 TYR B 983     3194   3177   3227   -162   -223    143
ATOM   1129  CZ  TYR B 983     109.643  80.636   9.226  1.00 27.33           C  
ANISOU 1129  CZ  TYR B 983     3479   3405   3499   -158   -215    156
ATOM   1130  OH  TYR B 983     109.940  80.689  10.549  1.00 26.67           O  
ANISOU 1130  OH  TYR B 983     3422   3268   3441   -180   -236    135
ATOM   1131  H   TYR B 983     108.543  83.067   4.934  1.00  0.00           H  
ATOM   1132  HH  TYR B 983     110.590  81.394  10.717  1.00  0.00           H  
ATOM   1133  N   ALA B 984     107.803  81.346   2.155  1.00 19.93           N  
ANISOU 1133  N   ALA B 984     2350   2885   2334   -149    -92    171
ATOM   1134  CA  ALA B 984     107.280  80.995   0.843  1.00 17.97           C  
ANISOU 1134  CA  ALA B 984     2064   2731   2029   -167    -67    119
ATOM   1135  C   ALA B 984     108.282  81.338  -0.271  1.00 18.55           C  
ANISOU 1135  C   ALA B 984     2120   2901   2026   -161    -69    165
ATOM   1136  O   ALA B 984     108.536  80.503  -1.139  1.00 19.38           O  
ANISOU 1136  O   ALA B 984     2211   3061   2090   -162    -68    124
ATOM   1137  CB  ALA B 984     105.920  81.663   0.619  1.00 14.77           C  
ANISOU 1137  CB  ALA B 984     1621   2360   1628   -199    -32     90
ATOM   1138  H   ALA B 984     107.287  82.029   2.705  1.00  0.00           H  
ATOM   1139  N   VAL B 985     108.908  82.518  -0.176  1.00 17.25           N  
ANISOU 1139  N   VAL B 985     1951   2749   1852   -153    -75    256
ATOM   1140  CA  VAL B 985     109.986  82.919  -1.069  1.00 21.58           C  
ANISOU 1140  CA  VAL B 985     2476   3382   2339   -141    -85    328
ATOM   1141  C   VAL B 985     111.191  81.961  -1.004  1.00 20.52           C  
ANISOU 1141  C   VAL B 985     2360   3210   2224   -108   -109    328
ATOM   1142  O   VAL B 985     111.711  81.567  -2.045  1.00 20.68           O  
ANISOU 1142  O   VAL B 985     2353   3315   2188   -105   -118    327
ATOM   1143  CB  VAL B 985     110.475  84.361  -0.774  1.00 26.10           C  
ANISOU 1143  CB  VAL B 985     3041   3947   2929   -133    -85    444
ATOM   1144  CG1 VAL B 985     111.749  84.729  -1.542  1.00 28.01           C  
ANISOU 1144  CG1 VAL B 985     3256   4254   3132   -111   -103    538
ATOM   1145  CG2 VAL B 985     109.386  85.375  -1.125  1.00 24.08           C  
ANISOU 1145  CG2 VAL B 985     2756   3760   2631   -172    -55    453
ATOM   1146  H   VAL B 985     108.644  83.165   0.564  1.00  0.00           H  
ATOM   1147  N   GLN B 986     111.629  81.617   0.207  1.00 19.01           N  
ANISOU 1147  N   GLN B 986     2213   2896   2112    -86   -118    323
ATOM   1148  CA  GLN B 986     112.770  80.731   0.407  1.00 16.65           C  
ANISOU 1148  CA  GLN B 986     1934   2552   1839    -57   -131    316
ATOM   1149  C   GLN B 986     112.546  79.326  -0.145  1.00 14.82           C  
ANISOU 1149  C   GLN B 986     1701   2351   1577    -65   -129    229
ATOM   1150  O   GLN B 986     113.446  78.765  -0.772  1.00 18.55           O  
ANISOU 1150  O   GLN B 986     2159   2856   2031    -50   -136    229
ATOM   1151  CB  GLN B 986     113.101  80.661   1.887  1.00 16.55           C  
ANISOU 1151  CB  GLN B 986     1968   2410   1907    -45   -134    313
ATOM   1152  CG  GLN B 986     113.703  81.967   2.409  1.00 16.57           C  
ANISOU 1152  CG  GLN B 986     1968   2366   1962    -34   -130    396
ATOM   1153  CD  GLN B 986     113.794  81.930   3.921  1.00 28.30           C  
ANISOU 1153  CD  GLN B 986     3497   3732   3522    -37   -129    367
ATOM   1154  OE1 GLN B 986     113.907  80.854   4.491  1.00 24.95           O  
ANISOU 1154  OE1 GLN B 986     3107   3267   3104    -38   -134    303
ATOM   1155  NE2 GLN B 986     113.764  83.085   4.572  1.00 25.11           N  
ANISOU 1155  NE2 GLN B 986     3090   3278   3171    -44   -121    415
ATOM   1156  H   GLN B 986     111.154  81.968   1.032  1.00  0.00           H  
ATOM   1157 HE22 GLN B 986     113.863  83.114   5.585  1.00  0.00           H  
ATOM   1158 HE21 GLN B 986     113.673  83.953   4.068  1.00  0.00           H  
ATOM   1159  N   ILE B 987     111.334  78.798   0.043  1.00 13.63           N  
ANISOU 1159  N   ILE B 987     1559   2189   1431    -89   -118    158
ATOM   1160  CA  ILE B 987     110.955  77.539  -0.576  1.00 14.28           C  
ANISOU 1160  CA  ILE B 987     1631   2296   1498   -100   -108     77
ATOM   1161  C   ILE B 987     111.011  77.643  -2.112  1.00 16.55           C  
ANISOU 1161  C   ILE B 987     1864   2714   1708   -117   -100     63
ATOM   1162  O   ILE B 987     111.605  76.778  -2.753  1.00 17.88           O  
ANISOU 1162  O   ILE B 987     2018   2918   1858   -114   -102     31
ATOM   1163  CB  ILE B 987     109.551  77.060  -0.147  1.00 13.69           C  
ANISOU 1163  CB  ILE B 987     1561   2180   1458   -121    -92     14
ATOM   1164  CG1 ILE B 987     109.509  76.757   1.361  1.00 13.82           C  
ANISOU 1164  CG1 ILE B 987     1627   2085   1538   -109   -109     27
ATOM   1165  CG2 ILE B 987     109.100  75.811  -0.927  1.00 16.82           C  
ANISOU 1165  CG2 ILE B 987     1935   2602   1852   -135    -71    -67
ATOM   1166  CD1 ILE B 987     108.077  76.645   1.879  1.00 13.71           C  
ANISOU 1166  CD1 ILE B 987     1605   2034   1568   -127   -101     -6
ATOM   1167  H   ILE B 987     110.636  79.295   0.595  1.00  0.00           H  
ATOM   1168  N   CYS B 988     110.446  78.718  -2.672  1.00 17.12           N  
ANISOU 1168  N   CYS B 988     1905   2866   1733   -139    -91     87
ATOM   1169  CA  CYS B 988     110.485  78.969  -4.108  1.00 17.15           C  
ANISOU 1169  CA  CYS B 988     1854   3017   1643   -165    -88     77
ATOM   1170  C   CYS B 988     111.922  79.072  -4.657  1.00 17.94           C  
ANISOU 1170  C   CYS B 988     1936   3171   1710   -139   -120    152
ATOM   1171  O   CYS B 988     112.185  78.555  -5.738  1.00 25.07           O  
ANISOU 1171  O   CYS B 988     2797   4174   2553   -155   -127    119
ATOM   1172  CB  CYS B 988     109.713  80.236  -4.487  1.00 21.22           C  
ANISOU 1172  CB  CYS B 988     2342   3612   2105   -197    -70    102
ATOM   1173  SG  CYS B 988     107.914  80.013  -4.410  1.00 23.78           S  
ANISOU 1173  SG  CYS B 988     2658   3914   2459   -237    -21    -11
ATOM   1174  H   CYS B 988     109.970  79.402  -2.089  1.00  0.00           H  
ATOM   1175  HG  CYS B 988     107.706  80.094  -3.086  1.00  0.00           H  
ATOM   1176  N   LYS B 989     112.836  79.704  -3.910  1.00 18.27           N  
ANISOU 1176  N   LYS B 989     1999   3144   1798   -102   -139    251
ATOM   1177  CA  LYS B 989     114.236  79.819  -4.304  1.00 21.26           C  
ANISOU 1177  CA  LYS B 989     2353   3551   2172    -70   -166    333
ATOM   1178  C   LYS B 989     114.957  78.467  -4.315  1.00 30.84           C  
ANISOU 1178  C   LYS B 989     3574   4723   3419    -52   -170    276
ATOM   1179  O   LYS B 989     115.698  78.193  -5.258  1.00 20.97           O  
ANISOU 1179  O   LYS B 989     2280   3554   2133    -47   -188    292
ATOM   1180  CB  LYS B 989     114.969  80.836  -3.419  1.00 24.58           C  
ANISOU 1180  CB  LYS B 989     2789   3889   2659    -36   -172    446
ATOM   1181  CG  LYS B 989     114.562  82.285  -3.720  1.00 29.23           C  
ANISOU 1181  CG  LYS B 989     3351   4546   3205    -52   -170    534
ATOM   1182  CD  LYS B 989     115.286  83.283  -2.812  1.00 29.79           C  
ANISOU 1182  CD  LYS B 989     3435   4517   3365    -19   -169    643
ATOM   1183  CE  LYS B 989     114.951  84.740  -3.169  1.00 35.76           C  
ANISOU 1183  CE  LYS B 989     4160   5344   4082    -36   -164    748
ATOM   1184  NZ  LYS B 989     115.564  85.696  -2.230  1.00 36.02           N1+
ANISOU 1184  NZ  LYS B 989     4203   5259   4222     -7   -154    849
ATOM   1185  H   LYS B 989     112.557  80.122  -3.027  1.00  0.00           H  
ATOM   1186  HZ1 LYS B 989     115.141  86.603  -2.347  1.00  0.00           H  
ATOM   1187  HZ2 LYS B 989     115.433  85.402  -1.278  1.00  0.00           H  
ATOM   1188  HZ3 LYS B 989     116.550  85.783  -2.409  1.00  0.00           H  
ATOM   1189  N   GLY B 990     114.704  77.629  -3.303  1.00 19.08           N  
ANISOU 1189  N   GLY B 990     2136   3115   1995    -45   -153    213
ATOM   1190  CA  GLY B 990     115.253  76.276  -3.253  1.00 17.89           C  
ANISOU 1190  CA  GLY B 990     1995   2927   1873    -34   -149    154
ATOM   1191  C   GLY B 990     114.727  75.429  -4.418  1.00 21.10           C  
ANISOU 1191  C   GLY B 990     2362   3427   2225    -66   -142     71
ATOM   1192  O   GLY B 990     115.499  74.761  -5.108  1.00 21.20           O  
ANISOU 1192  O   GLY B 990     2343   3483   2228    -60   -150     58
ATOM   1193  H   GLY B 990     114.105  77.932  -2.539  1.00  0.00           H  
ATOM   1194  N   MET B 991     113.416  75.499  -4.668  1.00 19.94           N  
ANISOU 1194  N   MET B 991     2211   3310   2052   -103   -123      9
ATOM   1195  CA  MET B 991     112.769  74.756  -5.741  1.00 20.78           C  
ANISOU 1195  CA  MET B 991     2278   3494   2122   -142   -104    -88
ATOM   1196  C   MET B 991     113.197  75.241  -7.127  1.00 24.38           C  
ANISOU 1196  C   MET B 991     2667   4110   2483   -163   -125    -69
ATOM   1197  O   MET B 991     113.390  74.423  -8.026  1.00 26.25           O  
ANISOU 1197  O   MET B 991     2865   4413   2695   -183   -123   -133
ATOM   1198  CB  MET B 991     111.244  74.845  -5.602  1.00 20.49           C  
ANISOU 1198  CB  MET B 991     2245   3443   2096   -176    -70   -158
ATOM   1199  CG  MET B 991     110.683  74.066  -4.408  1.00 23.72           C  
ANISOU 1199  CG  MET B 991     2704   3710   2598   -163    -53   -185
ATOM   1200  SD  MET B 991     111.064  72.290  -4.427  1.00 26.63           S  
ANISOU 1200  SD  MET B 991     3079   4020   3019   -158    -38   -251
ATOM   1201  CE  MET B 991     110.277  71.818  -5.985  1.00 31.23           C  
ANISOU 1201  CE  MET B 991     3591   4704   3570   -210     -2   -369
ATOM   1202  H   MET B 991     112.823  76.083  -4.084  1.00  0.00           H  
ATOM   1203  N   ASP B 992     113.379  76.556  -7.282  1.00 22.91           N  
ANISOU 1203  N   ASP B 992     2468   3991   2246   -160   -145     23
ATOM   1204  CA  ASP B 992     113.859  77.144  -8.528  1.00 25.17           C  
ANISOU 1204  CA  ASP B 992     2688   4444   2430   -180   -174     65
ATOM   1205  C   ASP B 992     115.296  76.692  -8.821  1.00 31.85           C  
ANISOU 1205  C   ASP B 992     3508   5297   3294   -144   -209    120
ATOM   1206  O   ASP B 992     115.620  76.365  -9.962  1.00 28.42           O  
ANISOU 1206  O   ASP B 992     3014   4989   2795   -166   -230     98
ATOM   1207  CB  ASP B 992     113.790  78.679  -8.527  1.00 23.29           C  
ANISOU 1207  CB  ASP B 992     2441   4267   2141   -181   -187    177
ATOM   1208  CG  ASP B 992     114.052  79.274  -9.911  1.00 40.61           C  
ANISOU 1208  CG  ASP B 992     4562   6662   4204   -216   -216    217
ATOM   1209  OD1 ASP B 992     113.430  78.799 -10.882  1.00 33.98           O  
ANISOU 1209  OD1 ASP B 992     3686   5933   3291   -270   -202    106
ATOM   1210  OD2 ASP B 992     114.804  80.267  -9.993  1.00 46.91           O1-
ANISOU 1210  OD2 ASP B 992     5335   7510   4976   -192   -251    360
ATOM   1211  H   ASP B 992     113.161  77.193  -6.516  1.00  0.00           H  
ATOM   1212  N   TYR B 993     116.125  76.628  -7.771  1.00 25.75           N  
ANISOU 1212  N   TYR B 993     2777   4390   2617    -90   -213    181
ATOM   1213  CA  TYR B 993     117.483  76.113  -7.869  1.00 27.99           C  
ANISOU 1213  CA  TYR B 993     3035   4655   2942    -52   -235    227
ATOM   1214  C   TYR B 993     117.501  74.650  -8.337  1.00 36.86           C  
ANISOU 1214  C   TYR B 993     4145   5784   4075    -69   -222    114
ATOM   1215  O   TYR B 993     118.241  74.322  -9.261  1.00 27.79           O  
ANISOU 1215  O   TYR B 993     2936   4722   2901    -69   -248    123
ATOM   1216  CB  TYR B 993     118.225  76.312  -6.541  1.00 24.50           C  
ANISOU 1216  CB  TYR B 993     2644   4057   2608      0   -225    290
ATOM   1217  CG  TYR B 993     119.598  75.671  -6.486  1.00 31.07           C  
ANISOU 1217  CG  TYR B 993     3456   4841   3507     40   -232    316
ATOM   1218  CD1 TYR B 993     120.714  76.325  -7.038  1.00 38.08           C  
ANISOU 1218  CD1 TYR B 993     4282   5780   4406     73   -264    431
ATOM   1219  CD2 TYR B 993     119.753  74.400  -5.904  1.00 26.97           C  
ANISOU 1219  CD2 TYR B 993     2974   4223   3047     46   -202    232
ATOM   1220  CE1 TYR B 993     121.983  75.721  -6.981  1.00 36.88           C  
ANISOU 1220  CE1 TYR B 993     4104   5574   4332    112   -264    452
ATOM   1221  CE2 TYR B 993     121.017  73.797  -5.848  1.00 29.90           C  
ANISOU 1221  CE2 TYR B 993     3327   4550   3484     80   -198    247
ATOM   1222  CZ  TYR B 993     122.132  74.455  -6.384  1.00 33.64           C  
ANISOU 1222  CZ  TYR B 993     3736   5067   3978    114   -227    353
ATOM   1223  OH  TYR B 993     123.352  73.855  -6.323  1.00 28.92           O  
ANISOU 1223  OH  TYR B 993     3112   4415   3461    150   -217    364
ATOM   1224  H   TYR B 993     115.791  76.895  -6.849  1.00  0.00           H  
ATOM   1225  HH  TYR B 993     124.056  74.413  -6.670  1.00  0.00           H  
ATOM   1226  N   LEU B 994     116.638  73.815  -7.751  1.00 26.08           N  
ANISOU 1226  N   LEU B 994     2828   4330   2749    -86   -183     14
ATOM   1227  CA  LEU B 994     116.480  72.411  -8.120  1.00 30.22           C  
ANISOU 1227  CA  LEU B 994     3343   4844   3295   -107   -159    -95
ATOM   1228  C   LEU B 994     116.051  72.236  -9.590  1.00 29.85           C  
ANISOU 1228  C   LEU B 994     3223   4951   3164   -160   -165   -168
ATOM   1229  O   LEU B 994     116.660  71.453 -10.320  1.00 27.07           O  
ANISOU 1229  O   LEU B 994     2825   4649   2810   -169   -173   -207
ATOM   1230  CB  LEU B 994     115.469  71.769  -7.151  1.00 31.53           C  
ANISOU 1230  CB  LEU B 994     3570   4890   3520   -117   -117   -168
ATOM   1231  CG  LEU B 994     115.341  70.243  -7.212  1.00 38.30           C  
ANISOU 1231  CG  LEU B 994     4431   5690   4430   -130    -83   -261
ATOM   1232  CD1 LEU B 994     116.634  69.529  -6.806  1.00 30.14           C  
ANISOU 1232  CD1 LEU B 994     3411   4592   3447    -92    -85   -228
ATOM   1233  CD2 LEU B 994     114.186  69.774  -6.341  1.00 30.41           C  
ANISOU 1233  CD2 LEU B 994     3483   4586   3483   -140    -48   -305
ATOM   1234  H   LEU B 994     116.053  74.163  -6.997  1.00  0.00           H  
ATOM   1235  N   GLY B 995     115.051  73.017 -10.019  1.00 24.97           N  
ANISOU 1235  N   GLY B 995     2594   4413   2479   -200   -159   -192
ATOM   1236  CA  GLY B 995     114.547  73.017 -11.392  1.00 31.37           C  
ANISOU 1236  CA  GLY B 995     3335   5389   3193   -262   -160   -271
ATOM   1237  C   GLY B 995     115.609  73.484 -12.397  1.00 34.46           C  
ANISOU 1237  C   GLY B 995     3656   5934   3501   -263   -217   -198
ATOM   1238  O   GLY B 995     115.625  73.009 -13.533  1.00 43.33           O  
ANISOU 1238  O   GLY B 995     4714   7186   4562   -310   -225   -274
ATOM   1239  H   GLY B 995     114.574  73.611  -9.345  1.00  0.00           H  
ATOM   1240  N   SER B 996     116.534  74.361 -11.982  1.00 33.33           N  
ANISOU 1240  N   SER B 996     3520   5777   3364   -212   -256    -48
ATOM   1241  CA  SER B 996     117.645  74.815 -12.821  1.00 47.70           C  
ANISOU 1241  CA  SER B 996     5268   7730   5125   -201   -315     51
ATOM   1242  C   SER B 996     118.680  73.702 -13.067  1.00 50.43           C  
ANISOU 1242  C   SER B 996     5581   8046   5534   -178   -328     28
ATOM   1243  O   SER B 996     119.327  73.685 -14.113  1.00 35.53           O  
ANISOU 1243  O   SER B 996     3613   6295   3590   -190   -374     57
ATOM   1244  CB  SER B 996     118.272  76.089 -12.220  1.00 46.13           C  
ANISOU 1244  CB  SER B 996     5081   7501   4943   -149   -344    225
ATOM   1245  OG  SER B 996     119.217  75.840 -11.192  1.00 38.43           O  
ANISOU 1245  OG  SER B 996     4144   6361   4097    -83   -337    280
ATOM   1246  H   SER B 996     116.473  74.737 -11.042  1.00  0.00           H  
ATOM   1247  HG  SER B 996     118.792  75.295 -10.499  1.00  0.00           H  
ATOM   1248  N   ARG B 997     118.787  72.771 -12.112  1.00 34.94           N  
ANISOU 1248  N   ARG B 997     3677   5913   3686   -147   -288    -20
ATOM   1249  CA  ARG B 997     119.609  71.572 -12.217  1.00 29.17           C  
ANISOU 1249  CA  ARG B 997     2922   5137   3024   -131   -283    -60
ATOM   1250  C   ARG B 997     118.881  70.423 -12.926  1.00 32.70           C  
ANISOU 1250  C   ARG B 997     3347   5621   3456   -190   -250   -220
ATOM   1251  O   ARG B 997     119.429  69.324 -12.977  1.00 35.22           O  
ANISOU 1251  O   ARG B 997     3653   5888   3841   -184   -233   -273
ATOM   1252  CB  ARG B 997     120.057  71.118 -10.820  1.00 37.53           C  
ANISOU 1252  CB  ARG B 997     4054   6000   4202    -77   -247    -39
ATOM   1253  CG  ARG B 997     120.788  72.176  -9.999  1.00 38.92           C  
ANISOU 1253  CG  ARG B 997     4256   6110   4419    -21   -264     97
ATOM   1254  CD  ARG B 997     122.131  72.521 -10.620  1.00 58.30           C  
ANISOU 1254  CD  ARG B 997     6633   8631   6887     13   -310    202
ATOM   1255  NE  ARG B 997     122.838  73.523  -9.827  1.00 66.89           N  
ANISOU 1255  NE  ARG B 997     7738   9640   8037     68   -317    333
ATOM   1256  CZ  ARG B 997     124.075  73.952 -10.087  1.00104.41           C  
ANISOU 1256  CZ  ARG B 997    12427  14406  12838    113   -348    448
ATOM   1257  NH1 ARG B 997     124.760  73.458 -11.117  1.00128.61           N  
ANISOU 1257  NH1 ARG B 997    15405  17570  15888    111   -382    453
ATOM   1258  NH2 ARG B 997     124.626  74.879  -9.313  1.00102.88           N1+
ANISOU 1258  NH2 ARG B 997    12248  14121  12719    161   -343    560
ATOM   1259  H   ARG B 997     118.222  72.851 -11.274  1.00  0.00           H  
ATOM   1260  HE  ARG B 997     122.316  73.896  -9.042  1.00  0.00           H  
ATOM   1261 HH12 ARG B 997     125.696  73.766 -11.332  1.00  0.00           H  
ATOM   1262 HH11 ARG B 997     124.362  72.757 -11.721  1.00  0.00           H  
ATOM   1263 HH22 ARG B 997     125.560  75.221  -9.484  1.00  0.00           H  
ATOM   1264 HH21 ARG B 997     124.115  75.314  -8.568  1.00  0.00           H  
ATOM   1265  N   GLN B 998     117.687  70.688 -13.476  1.00 32.09           N  
ANISOU 1265  N   GLN B 998     3261   5628   3303   -249   -235   -301
ATOM   1266  CA  GLN B 998     116.883  69.750 -14.256  1.00 33.89           C  
ANISOU 1266  CA  GLN B 998     3456   5896   3522   -315   -197   -463
ATOM   1267  C   GLN B 998     116.340  68.600 -13.390  1.00 41.85           C  
ANISOU 1267  C   GLN B 998     4525   6724   4651   -305   -132   -544
ATOM   1268  O   GLN B 998     116.280  67.464 -13.856  1.00 35.10           O  
ANISOU 1268  O   GLN B 998     3641   5852   3842   -334   -101   -647
ATOM   1269  CB  GLN B 998     117.666  69.231 -15.487  1.00 52.24           C  
ANISOU 1269  CB  GLN B 998     5685   8356   5804   -344   -233   -499
ATOM   1270  CG  GLN B 998     118.268  70.353 -16.360  1.00 48.61           C  
ANISOU 1270  CG  GLN B 998     5155   8090   5221   -353   -308   -399
ATOM   1271  CD  GLN B 998     119.027  69.864 -17.593  1.00 66.23           C  
ANISOU 1271  CD  GLN B 998     7286  10469   7410   -387   -351   -436
ATOM   1272  OE1 GLN B 998     119.589  70.672 -18.330  1.00 82.03           O  
ANISOU 1272  OE1 GLN B 998     9266  12426   9475   -408   -319   -550
ATOM   1273  NE2 GLN B 998     119.067  68.565 -17.846  1.00 75.22           N  
ANISOU 1273  NE2 GLN B 998     8354  11784   8440   -393   -425   -334
ATOM   1274  H   GLN B 998     117.294  71.615 -13.365  1.00  0.00           H  
ATOM   1275 HE22 GLN B 998     119.559  68.216 -18.656  1.00  0.00           H  
ATOM   1276 HE21 GLN B 998     118.592  67.910 -17.239  1.00  0.00           H  
ATOM   1277  N   TYR B 999     115.942  68.908 -12.155  1.00 29.65           N  
ANISOU 1277  N   TYR B 999     3059   5049   3155   -269   -112   -493
ATOM   1278  CA  TYR B 999     115.297  67.948 -11.269  1.00 30.60           C  
ANISOU 1278  CA  TYR B 999     3237   5010   3376   -263    -56   -550
ATOM   1279  C   TYR B 999     113.837  68.330 -11.045  1.00 25.71           C  
ANISOU 1279  C   TYR B 999     2643   4366   2758   -292    -21   -602
ATOM   1280  O   TYR B 999     113.525  69.516 -10.924  1.00 26.58           O  
ANISOU 1280  O   TYR B 999     2761   4528   2807   -293    -40   -553
ATOM   1281  CB  TYR B 999     116.022  67.925  -9.922  1.00 30.24           C  
ANISOU 1281  CB  TYR B 999     3263   4830   3394   -199    -62   -451
ATOM   1282  CG  TYR B 999     117.429  67.387  -9.953  1.00 29.86           C  
ANISOU 1282  CG  TYR B 999     3196   4771   3377   -167    -78   -412
ATOM   1283  CD1 TYR B 999     117.674  66.068 -10.363  1.00 28.41           C  
ANISOU 1283  CD1 TYR B 999     2984   4568   3243   -184    -48   -489
ATOM   1284  CD2 TYR B 999     118.500  68.209  -9.568  1.00 34.09           C  
ANISOU 1284  CD2 TYR B 999     3736   5307   3908   -119   -115   -298
ATOM   1285  CE1 TYR B 999     118.989  65.580 -10.412  1.00 27.72           C  
ANISOU 1285  CE1 TYR B 999     2873   4467   3190   -155    -57   -456
ATOM   1286  CE2 TYR B 999     119.814  67.724  -9.601  1.00 30.94           C  
ANISOU 1286  CE2 TYR B 999     3312   4890   3553    -87   -123   -264
ATOM   1287  CZ  TYR B 999     120.058  66.409 -10.030  1.00 30.05           C  
ANISOU 1287  CZ  TYR B 999     3171   4764   3481   -105    -94   -345
ATOM   1288  OH  TYR B 999     121.335  65.942 -10.064  1.00 32.38           O  
ANISOU 1288  OH  TYR B 999     3436   5038   3826    -74    -96   -314
ATOM   1289  H   TYR B 999     116.050  69.849 -11.796  1.00  0.00           H  
ATOM   1290  HH  TYR B 999     121.955  66.619  -9.769  1.00  0.00           H  
ATOM   1291  N   VAL B1000     112.983  67.315 -10.938  1.00 27.15           N  
ANISOU 1291  N   VAL B1000     2831   4464   3020   -315     33   -698
ATOM   1292  CA  VAL B1000     111.671  67.442 -10.314  1.00 28.35           C  
ANISOU 1292  CA  VAL B1000     3014   4539   3216   -326     71   -729
ATOM   1293  C   VAL B1000     111.737  66.780  -8.928  1.00 23.43           C  
ANISOU 1293  C   VAL B1000     2462   3751   2688   -281     83   -672
ATOM   1294  O   VAL B1000     112.339  65.710  -8.802  1.00 21.41           O  
ANISOU 1294  O   VAL B1000     2212   3436   2485   -269     97   -679
ATOM   1295  CB  VAL B1000     110.564  66.769 -11.162  1.00 28.01           C  
ANISOU 1295  CB  VAL B1000     2917   4512   3211   -388    132   -877
ATOM   1296  CG1 VAL B1000     110.341  67.560 -12.446  1.00 29.98           C  
ANISOU 1296  CG1 VAL B1000     3100   4942   3349   -444    123   -943
ATOM   1297  CG2 VAL B1000     110.831  65.291 -11.490  1.00 31.24           C  
ANISOU 1297  CG2 VAL B1000     3303   4861   3705   -399    166   -946
ATOM   1298  H   VAL B1000     113.298  66.365 -11.129  1.00  0.00           H  
ATOM   1299  N   HIS B1001     111.167  67.445  -7.917  1.00 23.28           N  
ANISOU 1299  N   HIS B1001     2492   3669   2682   -259     78   -615
ATOM   1300  CA  HIS B1001     111.205  67.009  -6.521  1.00 21.57           C  
ANISOU 1300  CA  HIS B1001     2343   3316   2534   -222     79   -551
ATOM   1301  C   HIS B1001     110.177  65.915  -6.222  1.00 19.21           C  
ANISOU 1301  C   HIS B1001     2045   2917   2335   -236    128   -604
ATOM   1302  O   HIS B1001     110.539  64.919  -5.598  1.00 19.26           O  
ANISOU 1302  O   HIS B1001     2082   2836   2398   -220    140   -579
ATOM   1303  CB  HIS B1001     110.999  68.196  -5.572  1.00 26.12           C  
ANISOU 1303  CB  HIS B1001     2963   3876   3083   -198     48   -469
ATOM   1304  CG  HIS B1001     111.256  67.863  -4.132  1.00 22.62           C  
ANISOU 1304  CG  HIS B1001     2586   3316   2690   -166     41   -405
ATOM   1305  ND1 HIS B1001     110.224  67.622  -3.222  1.00 24.25           N  
ANISOU 1305  ND1 HIS B1001     2834   3497   2880   -134     14   -337
ATOM   1306  CD2 HIS B1001     112.462  67.722  -3.485  1.00 17.60           C  
ANISOU 1306  CD2 HIS B1001     1977   2587   2123   -166     57   -401
ATOM   1307  CE1 HIS B1001     110.833  67.324  -2.082  1.00 15.08           C  
ANISOU 1307  CE1 HIS B1001     1727   2241   1760   -121     14   -302
ATOM   1308  NE2 HIS B1001     112.158  67.368  -2.184  1.00 19.38           N  
ANISOU 1308  NE2 HIS B1001     2261   2747   2354   -139     36   -334
ATOM   1309  H   HIS B1001     110.613  68.291  -8.126  1.00  0.00           H  
ATOM   1310  HE2 HIS B1001     112.830  67.139  -1.441  1.00  0.00           H  
ATOM   1311  N   ARG B1002     108.927  66.121  -6.673  1.00 18.70           N  
ANISOU 1311  N   ARG B1002     1944   2863   2298   -268    160   -670
ATOM   1312  CA  ARG B1002     107.823  65.159  -6.594  1.00 22.33           C  
ANISOU 1312  CA  ARG B1002     2383   3225   2874   -285    216   -728
ATOM   1313  C   ARG B1002     107.277  64.879  -5.178  1.00 21.07           C  
ANISOU 1313  C   ARG B1002     2275   2940   2789   -253    211   -646
ATOM   1314  O   ARG B1002     106.398  64.027  -5.056  1.00 22.50           O  
ANISOU 1314  O   ARG B1002     2437   3031   3078   -260    252   -668
ATOM   1315  CB  ARG B1002     108.192  63.827  -7.284  1.00 21.45           C  
ANISOU 1315  CB  ARG B1002     2239   3096   2815   -304    253   -793
ATOM   1316  CG  ARG B1002     108.734  63.979  -8.709  1.00 29.03           C  
ANISOU 1316  CG  ARG B1002     3140   4188   3702   -342    253   -878
ATOM   1317  CD  ARG B1002     109.261  62.670  -9.282  1.00 39.91           C  
ANISOU 1317  CD  ARG B1002     4484   5542   5135   -359    286   -937
ATOM   1318  NE  ARG B1002     108.279  61.588  -9.137  1.00 45.39           N  
ANISOU 1318  NE  ARG B1002     5162   6114   5968   -374    352   -984
ATOM   1319  CZ  ARG B1002     108.501  60.388  -8.588  1.00 38.82           C  
ANISOU 1319  CZ  ARG B1002     4350   5175   5222   -357    376   -947
ATOM   1320  NH1 ARG B1002     109.703  60.035  -8.138  1.00 41.10           N  
ANISOU 1320  NH1 ARG B1002     4680   5465   5471   -328    345   -876
ATOM   1321  NH2 ARG B1002     107.500  59.523  -8.494  1.00 46.44           N1+
ANISOU 1321  NH2 ARG B1002     5290   6031   6323   -372    438   -983
ATOM   1322  H   ARG B1002     108.702  67.016  -7.120  1.00  0.00           H  
ATOM   1323  HE  ARG B1002     107.349  61.830  -9.451  1.00  0.00           H  
ATOM   1324 HH12 ARG B1002     109.858  59.145  -7.697  1.00  0.00           H  
ATOM   1325 HH11 ARG B1002     110.455  60.723  -8.080  1.00  0.00           H  
ATOM   1326 HH22 ARG B1002     107.621  58.615  -8.073  1.00  0.00           H  
ATOM   1327 HH21 ARG B1002     106.571  59.757  -8.803  1.00  0.00           H  
ATOM   1328  N   ASP B1003     107.754  65.559  -4.129  1.00 21.71           N  
ANISOU 1328  N   ASP B1003     2414   3016   2819   -220    160   -550
ATOM   1329  CA  ASP B1003     107.344  65.288  -2.745  1.00 21.78           C  
ANISOU 1329  CA  ASP B1003     2469   2923   2880   -196    145   -471
ATOM   1330  C   ASP B1003     107.314  66.608  -1.954  1.00 20.85           C  
ANISOU 1330  C   ASP B1003     2389   2821   2710   -178     98   -403
ATOM   1331  O   ASP B1003     107.651  66.626  -0.771  1.00 19.08           O  
ANISOU 1331  O   ASP B1003     2218   2548   2482   -156     65   -327
ATOM   1332  CB  ASP B1003     108.244  64.213  -2.068  1.00 19.89           C  
ANISOU 1332  CB  ASP B1003     2274   2636   2648   -179    138   -422
ATOM   1333  CG  ASP B1003     107.604  63.496  -0.874  1.00 25.43           C  
ANISOU 1333  CG  ASP B1003     3006   3239   3417   -167    136   -355
ATOM   1334  OD1 ASP B1003     106.407  63.146  -0.925  1.00 32.18           O  
ANISOU 1334  OD1 ASP B1003     3829   4046   4351   -173    153   -360
ATOM   1335  OD2 ASP B1003     108.321  63.192   0.108  1.00 26.46           O1-
ANISOU 1335  OD2 ASP B1003     3186   3343   3522   -154    118   -296
ATOM   1336  H   ASP B1003     108.503  66.233  -4.252  1.00  0.00           H  
ATOM   1337  N   LEU B1004     106.956  67.730  -2.604  1.00 18.15           N  
ANISOU 1337  N   LEU B1004     2017   2551   2325   -192     98   -433
ATOM   1338  CA  LEU B1004     106.938  69.028  -1.931  1.00 18.63           C  
ANISOU 1338  CA  LEU B1004     2108   2630   2339   -177     59   -370
ATOM   1339  C   LEU B1004     105.663  69.121  -1.080  1.00 20.80           C  
ANISOU 1339  C   LEU B1004     2381   2831   2690   -176     62   -350
ATOM   1340  O   LEU B1004     104.564  69.218  -1.625  1.00 20.66           O  
ANISOU 1340  O   LEU B1004     2313   2808   2727   -196    101   -406
ATOM   1341  CB  LEU B1004     107.098  70.183  -2.940  1.00 20.69           C  
ANISOU 1341  CB  LEU B1004     2337   3003   2522   -194     58   -394
ATOM   1342  CG  LEU B1004     107.168  71.594  -2.320  1.00 23.27           C  
ANISOU 1342  CG  LEU B1004     2686   3349   2804   -183     26   -326
ATOM   1343  CD1 LEU B1004     108.264  71.717  -1.254  1.00 20.89           C  
ANISOU 1343  CD1 LEU B1004     2444   3003   2488   -150    -16   -243
ATOM   1344  CD2 LEU B1004     107.386  72.621  -3.428  1.00 25.08           C  
ANISOU 1344  CD2 LEU B1004     2877   3703   2946   -203     28   -341
ATOM   1345  H   LEU B1004     106.660  67.699  -3.568  1.00  0.00           H  
ATOM   1346  N   ALA B1005     105.849  69.011   0.232  1.00 20.02           N  
ANISOU 1346  N   ALA B1005     2332   2674   2598   -155     23   -273
ATOM   1347  CA  ALA B1005     104.837  69.044   1.272  1.00 17.53           C  
ANISOU 1347  CA  ALA B1005     2017   2293   2351   -151     10   -233
ATOM   1348  C   ALA B1005     105.523  69.657   2.496  1.00 15.98           C  
ANISOU 1348  C   ALA B1005     1879   2084   2106   -136    -44   -156
ATOM   1349  O   ALA B1005     106.751  69.549   2.615  1.00 16.61           O  
ANISOU 1349  O   ALA B1005     2001   2186   2125   -127    -61   -139
ATOM   1350  CB  ALA B1005     104.361  67.607   1.546  1.00 17.49           C  
ANISOU 1350  CB  ALA B1005     1998   2210   2435   -149     30   -229
ATOM   1351  H   ALA B1005     106.790  68.934   0.597  1.00  0.00           H  
ATOM   1352  N   ALA B1006     104.753  70.270   3.402  1.00 16.61           N  
ANISOU 1352  N   ALA B1006     1958   2131   2222   -135    -70   -117
ATOM   1353  CA  ALA B1006     105.301  71.011   4.545  1.00 16.68           C  
ANISOU 1353  CA  ALA B1006     2013   2133   2189   -130   -119    -60
ATOM   1354  C   ALA B1006     106.119  70.156   5.539  1.00 17.83           C  
ANISOU 1354  C   ALA B1006     2213   2255   2307   -126   -144    -26
ATOM   1355  O   ALA B1006     106.982  70.694   6.230  1.00 17.74           O  
ANISOU 1355  O   ALA B1006     2245   2254   2242   -125   -168     -7
ATOM   1356  CB  ALA B1006     104.173  71.767   5.247  1.00 15.87           C  
ANISOU 1356  CB  ALA B1006     1890   1998   2142   -135   -143    -28
ATOM   1357  H   ALA B1006     103.735  70.300   3.265  1.00  0.00           H  
ATOM   1358  N   ARG B1007     105.888  68.835   5.549  1.00 17.02           N  
ANISOU 1358  N   ARG B1007     2103   2118   2242   -126   -132    -20
ATOM   1359  CA  ARG B1007     106.691  67.843   6.273  1.00 16.60           C  
ANISOU 1359  CA  ARG B1007     2101   2054   2153   -128   -147     11
ATOM   1360  C   ARG B1007     108.163  67.770   5.806  1.00 16.85           C  
ANISOU 1360  C   ARG B1007     2162   2117   2121   -123   -126    -21
ATOM   1361  O   ARG B1007     109.016  67.352   6.587  1.00 14.49           O  
ANISOU 1361  O   ARG B1007     1910   1816   1779   -127   -134     -4
ATOM   1362  CB  ARG B1007     106.015  66.452   6.177  1.00 19.73           C  
ANISOU 1362  CB  ARG B1007     2476   2408   2613   -129   -129     34
ATOM   1363  CG  ARG B1007     105.802  65.910   4.745  1.00 24.73           C  
ANISOU 1363  CG  ARG B1007     3066   3035   3292   -127    -71    -25
ATOM   1364  CD  ARG B1007     105.335  64.445   4.717  1.00 32.75           C  
ANISOU 1364  CD  ARG B1007     4050   3992   4401   -128    -45      0
ATOM   1365  NE  ARG B1007     104.843  64.060   3.385  1.00 29.80           N  
ANISOU 1365  NE  ARG B1007     3615   3606   4101   -132     13    -76
ATOM   1366  CZ  ARG B1007     105.559  63.700   2.308  1.00 33.54           C  
ANISOU 1366  CZ  ARG B1007     4078   4101   4563   -139     55   -141
ATOM   1367  NH1 ARG B1007     106.883  63.578   2.344  1.00 32.44           N  
ANISOU 1367  NH1 ARG B1007     3984   3988   4351   -138     50   -133
ATOM   1368  NH2 ARG B1007     104.929  63.454   1.165  1.00 43.96           N1+
ANISOU 1368  NH2 ARG B1007     5336   5418   5949   -151    108   -221
ATOM   1369  H   ARG B1007     105.162  68.487   4.939  1.00  0.00           H  
ATOM   1370  HE  ARG B1007     103.839  64.129   3.286  1.00  0.00           H  
ATOM   1371 HH12 ARG B1007     107.404  63.340   1.474  1.00  0.00           H  
ATOM   1372 HH11 ARG B1007     107.445  63.827   3.141  1.00  0.00           H  
ATOM   1373 HH22 ARG B1007     105.495  63.274   0.296  1.00  0.00           H  
ATOM   1374 HH21 ARG B1007     103.935  63.526   1.043  1.00  0.00           H  
ATOM   1375  N   ASN B1008     108.438  68.154   4.553  1.00 14.15           N  
ANISOU 1375  N   ASN B1008     1789   1812   1773   -117    -98    -68
ATOM   1376  CA  ASN B1008     109.772  68.099   3.947  1.00 18.19           C  
ANISOU 1376  CA  ASN B1008     2316   2358   2236   -109    -83    -91
ATOM   1377  C   ASN B1008     110.426  69.485   3.919  1.00 16.75           C  
ANISOU 1377  C   ASN B1008     2141   2208   2014    -99    -99    -81
ATOM   1378  O   ASN B1008     111.571  69.582   3.480  1.00 17.64           O  
ANISOU 1378  O   ASN B1008     2251   2351   2100    -89    -88    -91
ATOM   1379  CB  ASN B1008     109.680  67.518   2.517  1.00 18.61           C  
ANISOU 1379  CB  ASN B1008     2323   2439   2306   -111    -44   -144
ATOM   1380  CG  ASN B1008     109.463  66.006   2.449  1.00 23.43           C  
ANISOU 1380  CG  ASN B1008     2932   3008   2960   -118    -18   -151
ATOM   1381  OD1 ASN B1008     109.597  65.275   3.428  1.00 23.10           O  
ANISOU 1381  OD1 ASN B1008     2933   2935   2906   -118    -28   -113
ATOM   1382  ND2 ASN B1008     109.137  65.521   1.264  1.00 19.49           N  
ANISOU 1382  ND2 ASN B1008     2382   2508   2515   -128     17   -199
ATOM   1383  H   ASN B1008     107.701  68.543   3.970  1.00  0.00           H  
ATOM   1384 HD22 ASN B1008     108.988  64.523   1.079  1.00  0.00           H  
ATOM   1385 HD21 ASN B1008     108.845  66.128   0.500  1.00  0.00           H  
ATOM   1386  N   VAL B1009     109.733  70.530   4.385  1.00 11.94           N  
ANISOU 1386  N   VAL B1009     1534   1590   1412   -103   -124    -55
ATOM   1387  CA  VAL B1009     110.322  71.847   4.572  1.00 14.33           C  
ANISOU 1387  CA  VAL B1009     1844   1909   1691    -96   -137    -34
ATOM   1388  C   VAL B1009     110.858  71.896   6.016  1.00 19.52           C  
ANISOU 1388  C   VAL B1009     2550   2523   2342   -102   -161    -10
ATOM   1389  O   VAL B1009     110.074  71.985   6.961  1.00 14.80           O  
ANISOU 1389  O   VAL B1009     1961   1900   1760   -117   -186      4
ATOM   1390  CB  VAL B1009     109.296  72.990   4.347  1.00 13.04           C  
ANISOU 1390  CB  VAL B1009     1644   1769   1540   -103   -140    -26
ATOM   1391  CG1 VAL B1009     109.923  74.384   4.557  1.00 11.08           C  
ANISOU 1391  CG1 VAL B1009     1403   1532   1275    -95   -149      8
ATOM   1392  CG2 VAL B1009     108.663  72.920   2.944  1.00 16.03           C  
ANISOU 1392  CG2 VAL B1009     1971   2203   1914   -107   -110    -66
ATOM   1393  H   VAL B1009     108.820  70.386   4.794  1.00  0.00           H  
ATOM   1394  N   LEU B1010     112.180  71.787   6.151  1.00 14.58           N  
ANISOU 1394  N   LEU B1010     1949   1891   1700    -92   -152    -11
ATOM   1395  CA  LEU B1010     112.937  71.937   7.388  1.00 16.32           C  
ANISOU 1395  CA  LEU B1010     2214   2073   1913   -105   -163    -10
ATOM   1396  C   LEU B1010     113.003  73.413   7.805  1.00 19.17           C  
ANISOU 1396  C   LEU B1010     2572   2416   2295   -105   -172      8
ATOM   1397  O   LEU B1010     113.100  74.279   6.938  1.00 14.25           O  
ANISOU 1397  O   LEU B1010     1917   1811   1685    -87   -162     30
ATOM   1398  CB  LEU B1010     114.365  71.389   7.162  1.00 12.34           C  
ANISOU 1398  CB  LEU B1010     1734   1559   1394    -98   -134    -33
ATOM   1399  CG  LEU B1010     114.555  69.920   7.576  1.00 14.98           C  
ANISOU 1399  CG  LEU B1010     2077   1903   1710   -102   -118    -51
ATOM   1400  CD1 LEU B1010     115.956  69.427   7.162  1.00 15.32           C  
ANISOU 1400  CD1 LEU B1010     2134   1938   1747    -92    -82    -76
ATOM   1401  CD2 LEU B1010     114.291  69.703   9.080  1.00 17.35           C  
ANISOU 1401  CD2 LEU B1010     2410   2192   1989   -131   -140    -42
ATOM   1402  H   LEU B1010     112.732  71.891   5.302  1.00  0.00           H  
ATOM   1403  N   VAL B1011     113.017  73.669   9.114  1.00 12.40           N  
ANISOU 1403  N   VAL B1011     1744   1527   1438   -130   -192      2
ATOM   1404  CA  VAL B1011     113.205  74.996   9.689  1.00 14.99           C  
ANISOU 1404  CA  VAL B1011     2071   1826   1798   -139   -199     12
ATOM   1405  C   VAL B1011     114.622  75.056  10.290  1.00 17.72           C  
ANISOU 1405  C   VAL B1011     2442   2132   2156   -141   -172    -14
ATOM   1406  O   VAL B1011     114.931  74.278  11.193  1.00 20.25           O  
ANISOU 1406  O   VAL B1011     2800   2441   2451   -167   -172    -54
ATOM   1407  CB  VAL B1011     112.151  75.254  10.803  1.00 17.34           C  
ANISOU 1407  CB  VAL B1011     2374   2115   2099   -171   -239     14
ATOM   1408  CG1 VAL B1011     112.349  76.581  11.562  1.00 15.27           C  
ANISOU 1408  CG1 VAL B1011     2108   1816   1878   -185   -239     15
ATOM   1409  CG2 VAL B1011     110.727  75.216  10.223  1.00 15.29           C  
ANISOU 1409  CG2 VAL B1011     2077   1881   1849   -166   -256     39
ATOM   1410  H   VAL B1011     112.936  72.913   9.789  1.00  0.00           H  
ATOM   1411  N   GLU B1012     115.462  75.971   9.788  1.00 18.17           N  
ANISOU 1411  N   GLU B1012     2476   2172   2255   -114   -145      7
ATOM   1412  CA  GLU B1012     116.794  76.246  10.335  1.00 19.33           C  
ANISOU 1412  CA  GLU B1012     2634   2265   2444   -110   -109    -15
ATOM   1413  C   GLU B1012     116.674  77.187  11.544  1.00 24.75           C  
ANISOU 1413  C   GLU B1012     3330   2900   3174   -139   -112    -31
ATOM   1414  O   GLU B1012     117.327  76.981  12.567  1.00 23.05           O  
ANISOU 1414  O   GLU B1012     3138   2639   2980   -161    -87    -86
ATOM   1415  CB  GLU B1012     117.678  76.848   9.214  1.00 22.95           C  
ANISOU 1415  CB  GLU B1012     3052   2720   2947    -66    -82     31
ATOM   1416  CG  GLU B1012     119.128  77.258   9.578  1.00 27.33           C  
ANISOU 1416  CG  GLU B1012     3600   3199   3583    -56    -39     23
ATOM   1417  CD  GLU B1012     120.068  76.110   9.945  1.00 37.18           C  
ANISOU 1417  CD  GLU B1012     4879   4419   4827    -66     -5    -49
ATOM   1418  OE1 GLU B1012     120.881  75.727   9.076  1.00 38.96           O  
ANISOU 1418  OE1 GLU B1012     5115   4690   4997    -61     -6    -66
ATOM   1419  OE2 GLU B1012     120.026  75.649  11.102  1.00 51.51           O1-
ANISOU 1419  OE2 GLU B1012     6704   6165   6700    -82     30    -93
ATOM   1420  H   GLU B1012     115.114  76.645   9.112  1.00  0.00           H  
ATOM   1421  N   SER B1013     115.817  78.202  11.419  1.00 26.13           N  
ANISOU 1421  N   SER B1013     3481   3081   3366   -144   -136      8
ATOM   1422  CA  SER B1013     115.624  79.238  12.423  1.00 24.78           C  
ANISOU 1422  CA  SER B1013     3310   2861   3244   -175   -141     -3
ATOM   1423  C   SER B1013     114.280  79.900  12.154  1.00 23.81           C  
ANISOU 1423  C   SER B1013     3158   2766   3120   -178   -171     42
ATOM   1424  O   SER B1013     113.666  79.634  11.119  1.00 24.49           O  
ANISOU 1424  O   SER B1013     3224   2905   3174   -156   -180     79
ATOM   1425  CB  SER B1013     116.797  80.250  12.370  1.00 32.31           C  
ANISOU 1425  CB  SER B1013     4243   3743   4290   -158    -94     11
ATOM   1426  OG  SER B1013     116.737  81.101  11.229  1.00 27.49           O  
ANISOU 1426  OG  SER B1013     3588   3147   3708   -120    -87     99
ATOM   1427  H   SER B1013     115.214  78.289  10.604  1.00  0.00           H  
ATOM   1428  HG  SER B1013     117.634  81.389  11.019  1.00  0.00           H  
ATOM   1429  N   GLU B1014     113.884  80.830  13.030  1.00 22.84           N  
ANISOU 1429  N   GLU B1014     3028   2609   3040   -209   -182     35
ATOM   1430  CA  GLU B1014     112.710  81.673  12.809  1.00 22.04           C  
ANISOU 1430  CA  GLU B1014     2893   2528   2950   -214   -203     77
ATOM   1431  C   GLU B1014     112.721  82.389  11.437  1.00 19.75           C  
ANISOU 1431  C   GLU B1014     2567   2263   2673   -176   -178    151
ATOM   1432  O   GLU B1014     111.656  82.692  10.906  1.00 24.32           O  
ANISOU 1432  O   GLU B1014     3118   2885   3237   -175   -188    183
ATOM   1433  CB  GLU B1014     112.613  82.689  13.959  1.00 33.61           C  
ANISOU 1433  CB  GLU B1014     4350   3939   4478   -253   -207     59
ATOM   1434  CG  GLU B1014     111.435  83.677  13.844  1.00 46.36           C  
ANISOU 1434  CG  GLU B1014     5926   5566   6122   -261   -220    102
ATOM   1435  CD  GLU B1014     111.486  84.786  14.885  1.00 63.39           C  
ANISOU 1435  CD  GLU B1014     8068   7660   8356   -299   -215     85
ATOM   1436  OE1 GLU B1014     112.134  84.597  15.936  1.00 45.40           O  
ANISOU 1436  OE1 GLU B1014     5813   5341   6093   -331   -216     19
ATOM   1437  OE2 GLU B1014     110.881  85.846  14.633  1.00 53.59           O1-
ANISOU 1437  OE2 GLU B1014     6790   6411   7160   -300   -205    132
ATOM   1438  H   GLU B1014     114.437  81.022  13.855  1.00  0.00           H  
ATOM   1439  N   HIS B1015     113.910  82.627  10.880  1.00 19.90           N  
ANISOU 1439  N   HIS B1015     2580   2260   2719   -148   -144    179
ATOM   1440  CA  HIS B1015     114.070  83.432   9.680  1.00 22.64           C  
ANISOU 1440  CA  HIS B1015     2888   2638   3075   -117   -124    262
ATOM   1441  C   HIS B1015     114.405  82.617   8.438  1.00 22.46           C  
ANISOU 1441  C   HIS B1015     2857   2681   2994    -84   -123    278
ATOM   1442  O   HIS B1015     114.497  83.220   7.367  1.00 23.41           O  
ANISOU 1442  O   HIS B1015     2941   2852   3100    -64   -114    347
ATOM   1443  CB  HIS B1015     115.162  84.475   9.932  1.00 28.93           C  
ANISOU 1443  CB  HIS B1015     3667   3358   3966   -107    -89    305
ATOM   1444  CG  HIS B1015     114.883  85.324  11.137  1.00 36.77           C  
ANISOU 1444  CG  HIS B1015     4661   4279   5030   -144    -84    281
ATOM   1445  ND1 HIS B1015     113.755  86.110  11.239  1.00 39.29           N  
ANISOU 1445  ND1 HIS B1015     4960   4616   5352   -166    -96    305
ATOM   1446  CD2 HIS B1015     115.556  85.465  12.325  1.00 47.82           C  
ANISOU 1446  CD2 HIS B1015     6078   5589   6503   -169    -65    220
ATOM   1447  CE1 HIS B1015     113.771  86.686  12.440  1.00 46.21           C  
ANISOU 1447  CE1 HIS B1015     5838   5417   6301   -202    -91    269
ATOM   1448  NE2 HIS B1015     114.849  86.348  13.149  1.00 52.66           N  
ANISOU 1448  NE2 HIS B1015     6678   6169   7158   -206    -72    213
ATOM   1449  H   HIS B1015     114.750  82.249  11.303  1.00  0.00           H  
ATOM   1450  HD1 HIS B1015     113.023  86.189  10.541  1.00  0.00           H  
ATOM   1451  N   GLN B1016     114.603  81.301   8.565  1.00 20.45           N  
ANISOU 1451  N   GLN B1016     2633   2438   2697    -84   -132    219
ATOM   1452  CA  GLN B1016     115.122  80.515   7.457  1.00 19.78           C  
ANISOU 1452  CA  GLN B1016     2537   2407   2571    -55   -126    229
ATOM   1453  C   GLN B1016     114.552  79.100   7.438  1.00 20.58           C  
ANISOU 1453  C   GLN B1016     2662   2544   2613    -64   -141    169
ATOM   1454  O   GLN B1016     114.614  78.403   8.453  1.00 16.94           O  
ANISOU 1454  O   GLN B1016     2239   2047   2150    -83   -148    118
ATOM   1455  CB  GLN B1016     116.656  80.498   7.490  1.00 22.36           C  
ANISOU 1455  CB  GLN B1016     2862   2685   2949    -29    -98    239
ATOM   1456  CG  GLN B1016     117.277  79.876   6.225  1.00 30.25           C  
ANISOU 1456  CG  GLN B1016     3835   3742   3915      2    -94    262
ATOM   1457  CD  GLN B1016     118.793  79.765   6.321  1.00 33.94           C  
ANISOU 1457  CD  GLN B1016     4294   4150   4448     30    -63    269
ATOM   1458  OE1 GLN B1016     119.398  80.072   7.344  1.00 33.61           O  
ANISOU 1458  OE1 GLN B1016     4271   4022   4477     21    -39    243
ATOM   1459  NE2 GLN B1016     119.430  79.318   5.254  1.00 36.72           N  
ANISOU 1459  NE2 GLN B1016     4613   4551   4785     59    -62    298
ATOM   1460  H   GLN B1016     114.404  80.818   9.437  1.00  0.00           H  
ATOM   1461 HE22 GLN B1016     120.431  79.216   5.264  1.00  0.00           H  
ATOM   1462 HE21 GLN B1016     118.929  79.038   4.418  1.00  0.00           H  
ATOM   1463  N   VAL B1017     114.105  78.667   6.260  1.00 13.16           N  
ANISOU 1463  N   VAL B1017     1696   1677   1625    -54   -144    177
ATOM   1464  CA  VAL B1017     113.713  77.286   6.007  1.00 16.21           C  
ANISOU 1464  CA  VAL B1017     2097   2090   1971    -59   -150    125
ATOM   1465  C   VAL B1017     114.572  76.658   4.888  1.00 17.18           C  
ANISOU 1465  C   VAL B1017     2202   2252   2072    -36   -135    124
ATOM   1466  O   VAL B1017     115.255  77.373   4.148  1.00 17.60           O  
ANISOU 1466  O   VAL B1017     2220   2335   2129    -15   -128    172
ATOM   1467  CB  VAL B1017     112.214  77.191   5.626  1.00 15.00           C  
ANISOU 1467  CB  VAL B1017     1926   1977   1797    -77   -161    110
ATOM   1468  CG1 VAL B1017     111.318  77.539   6.821  1.00 16.95           C  
ANISOU 1468  CG1 VAL B1017     2188   2180   2071   -101   -182    105
ATOM   1469  CG2 VAL B1017     111.830  78.010   4.384  1.00 16.48           C  
ANISOU 1469  CG2 VAL B1017     2064   2237   1960    -73   -151    141
ATOM   1470  H   VAL B1017     114.073  79.309   5.464  1.00  0.00           H  
ATOM   1471  N   LYS B1018     114.538  75.325   4.787  1.00 12.85           N  
ANISOU 1471  N   LYS B1018     1670   1708   1503    -40   -131     76
ATOM   1472  CA  LYS B1018     115.226  74.552   3.758  1.00 18.96           C  
ANISOU 1472  CA  LYS B1018     2424   2518   2260    -23   -116     64
ATOM   1473  C   LYS B1018     114.340  73.398   3.275  1.00 20.00           C  
ANISOU 1473  C   LYS B1018     2552   2679   2367    -37   -113     17
ATOM   1474  O   LYS B1018     113.519  72.899   4.040  1.00 15.40           O  
ANISOU 1474  O   LYS B1018     1999   2063   1789    -54   -118     -5
ATOM   1475  CB  LYS B1018     116.545  73.957   4.304  1.00 20.03           C  
ANISOU 1475  CB  LYS B1018     2585   2602   2422    -10    -97     50
ATOM   1476  CG  LYS B1018     117.486  74.957   4.987  1.00 20.14           C  
ANISOU 1476  CG  LYS B1018     2597   2567   2487      5    -87     87
ATOM   1477  CD  LYS B1018     118.879  74.369   5.254  1.00 20.35           C  
ANISOU 1477  CD  LYS B1018     2635   2548   2548     19    -56     62
ATOM   1478  CE  LYS B1018     119.524  75.006   6.484  1.00 25.37           C  
ANISOU 1478  CE  LYS B1018     3263   3116   3259     34    -35     91
ATOM   1479  NZ  LYS B1018     120.903  74.575   6.730  1.00 25.99           N1+
ANISOU 1479  NZ  LYS B1018     3343   3143   3388     49      5     59
ATOM   1480  H   LYS B1018     113.939  74.790   5.419  1.00  0.00           H  
ATOM   1481  HZ1 LYS B1018     121.116  74.924   7.677  1.00  0.00           H  
ATOM   1482  HZ2 LYS B1018     121.010  73.546   6.723  1.00  0.00           H  
ATOM   1483  HZ3 LYS B1018     121.543  74.969   6.067  1.00  0.00           H  
ATOM   1484  N   ILE B1019     114.573  72.923   2.049  1.00 15.31           N  
ANISOU 1484  N   ILE B1019     1916   2150   1751    -32   -105      5
ATOM   1485  CA  ILE B1019     114.086  71.623   1.582  1.00 13.30           C  
ANISOU 1485  CA  ILE B1019     1651   1911   1489    -46    -92    -47
ATOM   1486  C   ILE B1019     114.942  70.520   2.255  1.00 16.71           C  
ANISOU 1486  C   ILE B1019     2116   2297   1934    -41    -76    -67
ATOM   1487  O   ILE B1019     116.173  70.587   2.194  1.00 16.28           O  
ANISOU 1487  O   ILE B1019     2057   2243   1885    -22    -67    -57
ATOM   1488  CB  ILE B1019     114.184  71.491   0.035  1.00 17.70           C  
ANISOU 1488  CB  ILE B1019     2149   2557   2016    -50    -85    -67
ATOM   1489  CG1 ILE B1019     113.411  72.623  -0.685  1.00 19.04           C  
ANISOU 1489  CG1 ILE B1019     2289   2784   2160    -62    -95    -48
ATOM   1490  CG2 ILE B1019     113.703  70.117  -0.483  1.00 15.95           C  
ANISOU 1490  CG2 ILE B1019     1913   2342   1806    -69    -62   -133
ATOM   1491  CD1 ILE B1019     113.842  72.838  -2.141  1.00 22.80           C  
ANISOU 1491  CD1 ILE B1019     2706   3373   2585    -70    -95    -54
ATOM   1492  H   ILE B1019     115.239  73.401   1.447  1.00  0.00           H  
ATOM   1493  N   GLY B1020     114.274  69.588   2.943  1.00 16.32           N  
ANISOU 1493  N   GLY B1020     2096   2209   1896    -57    -71    -87
ATOM   1494  CA  GLY B1020     114.877  68.683   3.917  1.00 14.56           C  
ANISOU 1494  CA  GLY B1020     1917   1942   1673    -59    -56    -95
ATOM   1495  C   GLY B1020     114.820  67.205   3.515  1.00 16.69           C  
ANISOU 1495  C   GLY B1020     2183   2208   1950    -68    -29   -125
ATOM   1496  O   GLY B1020     115.208  66.363   4.323  1.00 21.14           O  
ANISOU 1496  O   GLY B1020     2785   2741   2506    -76    -14   -127
ATOM   1497  H   GLY B1020     113.255  69.627   2.967  1.00  0.00           H  
ATOM   1498  N   ASP B1021     114.334  66.860   2.318  1.00 21.41           N  
ANISOU 1498  N   ASP B1021     2733   2839   2561    -72    -18   -152
ATOM   1499  CA  ASP B1021     114.289  65.482   1.816  1.00 20.48           C  
ANISOU 1499  CA  ASP B1021     2603   2712   2465    -82     14   -184
ATOM   1500  C   ASP B1021     114.345  65.542   0.287  1.00 16.81           C  
ANISOU 1500  C   ASP B1021     2074   2301   2009    -85     29   -229
ATOM   1501  O   ASP B1021     113.849  66.519  -0.275  1.00 21.38           O  
ANISOU 1501  O   ASP B1021     2620   2919   2581    -91     16   -239
ATOM   1502  CB  ASP B1021     113.021  64.717   2.262  1.00 20.67           C  
ANISOU 1502  CB  ASP B1021     2640   2693   2519    -99     19   -175
ATOM   1503  CG  ASP B1021     113.188  63.211   2.103  1.00 32.24           C  
ANISOU 1503  CG  ASP B1021     4101   4134   4012   -110     59   -191
ATOM   1504  OD1 ASP B1021     113.782  62.585   3.009  1.00 25.06           O  
ANISOU 1504  OD1 ASP B1021     3235   3204   3081   -113     70   -172
ATOM   1505  OD2 ASP B1021     112.805  62.658   1.054  1.00 23.38           O1-
ANISOU 1505  OD2 ASP B1021     2932   3013   2936   -120     84   -228
ATOM   1506  H   ASP B1021     114.071  67.569   1.645  1.00  0.00           H  
ATOM   1507  N   PHE B1022     114.926  64.520  -0.350  1.00 18.34           N  
ANISOU 1507  N   PHE B1022     2250   2502   2216    -87     57   -259
ATOM   1508  CA  PHE B1022     115.072  64.407  -1.801  1.00 21.83           C  
ANISOU 1508  CA  PHE B1022     2624   3006   2661    -96     69   -311
ATOM   1509  C   PHE B1022     114.725  62.989  -2.302  1.00 26.59           C  
ANISOU 1509  C   PHE B1022     3206   3583   3313   -117    112   -359
ATOM   1510  O   PHE B1022     115.119  62.630  -3.413  1.00 20.19           O  
ANISOU 1510  O   PHE B1022     2343   2818   2509   -127    127   -407
ATOM   1511  CB  PHE B1022     116.488  64.875  -2.232  1.00 20.67           C  
ANISOU 1511  CB  PHE B1022     2457   2911   2487    -75     54   -295
ATOM   1512  CG  PHE B1022     116.714  66.374  -2.127  1.00 19.42           C  
ANISOU 1512  CG  PHE B1022     2306   2779   2294    -57     16   -244
ATOM   1513  CD1 PHE B1022     117.137  66.951  -0.911  1.00 19.60           C  
ANISOU 1513  CD1 PHE B1022     2382   2745   2319    -39      7   -197
ATOM   1514  CD2 PHE B1022     116.299  67.220  -3.177  1.00 19.65           C  
ANISOU 1514  CD2 PHE B1022     2287   2889   2289    -64     -6   -246
ATOM   1515  CE1 PHE B1022     117.163  68.331  -0.770  1.00 18.12           C  
ANISOU 1515  CE1 PHE B1022     2199   2569   2114    -25    -20   -149
ATOM   1516  CE2 PHE B1022     116.342  68.598  -3.018  1.00 20.07           C  
ANISOU 1516  CE2 PHE B1022     2347   2962   2315    -50    -36   -188
ATOM   1517  CZ  PHE B1022     116.774  69.150  -1.821  1.00 19.85           C  
ANISOU 1517  CZ  PHE B1022     2371   2864   2305    -28    -42   -138
ATOM   1518  H   PHE B1022     115.257  63.717   0.174  1.00  0.00           H  
ATOM   1519  N   GLY B1023     113.989  62.203  -1.500  1.00 19.13           N  
ANISOU 1519  N   GLY B1023     2294   2567   2406   -126    130   -341
ATOM   1520  CA  GLY B1023     113.739  60.772  -1.689  1.00 21.76           C  
ANISOU 1520  CA  GLY B1023     2610   2856   2799   -145    177   -369
ATOM   1521  C   GLY B1023     113.096  60.400  -3.028  1.00 22.34           C  
ANISOU 1521  C   GLY B1023     2611   2953   2923   -170    207   -449
ATOM   1522  O   GLY B1023     113.425  59.349  -3.582  1.00 24.66           O  
ANISOU 1522  O   GLY B1023     2876   3232   3262   -186    248   -488
ATOM   1523  H   GLY B1023     113.621  62.585  -0.623  1.00  0.00           H  
ATOM   1524  N   LEU B1024     112.210  61.247  -3.560  1.00 23.90           N  
ANISOU 1524  N   LEU B1024     2777   3188   3115   -179    193   -480
ATOM   1525  CA  LEU B1024     111.515  61.001  -4.821  1.00 23.42           C  
ANISOU 1525  CA  LEU B1024     2643   3157   3096   -213    226   -574
ATOM   1526  C   LEU B1024     112.083  61.835  -5.973  1.00 20.97           C  
ANISOU 1526  C   LEU B1024     2284   2968   2713   -224    203   -625
ATOM   1527  O   LEU B1024     111.543  61.750  -7.071  1.00 24.02           O  
ANISOU 1527  O   LEU B1024     2608   3404   3114   -260    227   -714
ATOM   1528  CB  LEU B1024     110.011  61.302  -4.675  1.00 24.18           C  
ANISOU 1528  CB  LEU B1024     2726   3211   3248   -224    240   -586
ATOM   1529  CG  LEU B1024     109.232  60.498  -3.619  1.00 27.05           C  
ANISOU 1529  CG  LEU B1024     3121   3461   3696   -215    258   -526
ATOM   1530  CD1 LEU B1024     107.736  60.736  -3.829  1.00 29.13           C  
ANISOU 1530  CD1 LEU B1024     3340   3688   4037   -230    284   -564
ATOM   1531  CD2 LEU B1024     109.519  58.994  -3.662  1.00 44.43           C  
ANISOU 1531  CD2 LEU B1024     5314   5600   5967   -224    305   -529
ATOM   1532  H   LEU B1024     111.973  62.091  -3.052  1.00  0.00           H  
ATOM   1533  N   THR B1025     113.135  62.621  -5.743  1.00 21.74           N  
ANISOU 1533  N   THR B1025     2405   3116   2737   -197    158   -568
ATOM   1534  CA  THR B1025     113.656  63.541  -6.747  1.00 24.39           C  
ANISOU 1534  CA  THR B1025     2695   3573   2998   -203    125   -586
ATOM   1535  C   THR B1025     114.263  62.791  -7.958  1.00 23.21           C  
ANISOU 1535  C   THR B1025     2478   3486   2854   -228    141   -658
ATOM   1536  O   THR B1025     115.010  61.827  -7.770  1.00 23.52           O  
ANISOU 1536  O   THR B1025     2523   3480   2932   -219    160   -653
ATOM   1537  CB  THR B1025     114.708  64.489  -6.127  1.00 27.49           C  
ANISOU 1537  CB  THR B1025     3126   3983   3335   -161     78   -491
ATOM   1538  OG1 THR B1025     114.099  65.277  -5.114  1.00 20.18           O  
ANISOU 1538  OG1 THR B1025     2252   3012   2402   -146     62   -436
ATOM   1539  CG2 THR B1025     115.344  65.456  -7.130  1.00 17.40           C  
ANISOU 1539  CG2 THR B1025     1792   2832   1985   -163     39   -483
ATOM   1540  H   THR B1025     113.629  62.555  -4.862  1.00  0.00           H  
ATOM   1541  HG1 THR B1025     113.690  64.693  -4.466  1.00  0.00           H  
ATOM   1542  N   LYS B1026     113.914  63.236  -9.171  1.00 26.56           N  
ANISOU 1542  N   LYS B1026     2837   4021   3233   -265    134   -726
ATOM   1543  CA  LYS B1026     114.302  62.600 -10.426  1.00 27.99           C  
ANISOU 1543  CA  LYS B1026     2940   4278   3414   -303    146   -813
ATOM   1544  C   LYS B1026     114.842  63.647 -11.390  1.00 32.32           C  
ANISOU 1544  C   LYS B1026     3434   4989   3855   -315     93   -809
ATOM   1545  O   LYS B1026     114.343  64.772 -11.414  1.00 25.72           O  
ANISOU 1545  O   LYS B1026     2605   4216   2952   -318     66   -779
ATOM   1546  CB  LYS B1026     113.082  61.921 -11.076  1.00 29.57           C  
ANISOU 1546  CB  LYS B1026     3098   4457   3678   -357    206   -936
ATOM   1547  CG  LYS B1026     112.503  60.750 -10.280  1.00 32.76           C  
ANISOU 1547  CG  LYS B1026     3538   4706   4204   -350    263   -939
ATOM   1548  CD  LYS B1026     113.410  59.520 -10.279  1.00 43.58           C  
ANISOU 1548  CD  LYS B1026     4901   6028   5628   -345    287   -940
ATOM   1549  CE  LYS B1026     112.746  58.335  -9.575  1.00 42.23           C  
ANISOU 1549  CE  LYS B1026     4757   5710   5576   -345    348   -936
ATOM   1550  NZ  LYS B1026     113.596  57.135  -9.635  1.00 52.74           N1+
ANISOU 1550  NZ  LYS B1026     6080   6997   6961   -346    380   -937
ATOM   1551  H   LYS B1026     113.364  64.090  -9.253  1.00  0.00           H  
ATOM   1552  HZ1 LYS B1026     114.470  57.308  -9.168  1.00  0.00           H  
ATOM   1553  HZ2 LYS B1026     113.136  56.368  -9.173  1.00  0.00           H  
ATOM   1554  HZ3 LYS B1026     113.772  56.890 -10.610  1.00  0.00           H  
ATOM   1555  N   ALA B1027     115.826  63.245 -12.200  1.00 30.30           N  
ANISOU 1555  N   ALA B1027     3119   4806   3586   -325     76   -830
ATOM   1556  CA  ALA B1027     116.322  64.060 -13.300  1.00 40.59           C  
ANISOU 1556  CA  ALA B1027     4353   6281   4786   -343     20   -824
ATOM   1557  C   ALA B1027     115.296  64.103 -14.442  1.00 31.87           C  
ANISOU 1557  C   ALA B1027     3185   5288   3634   -419     38   -953
ATOM   1558  O   ALA B1027     114.759  63.057 -14.811  1.00 38.95           O  
ANISOU 1558  O   ALA B1027     4057   6139   4601   -462     96  -1070
ATOM   1559  CB  ALA B1027     117.654  63.485 -13.799  1.00 31.96           C  
ANISOU 1559  CB  ALA B1027     3207   5229   3705   -331     -3   -808
ATOM   1560  H   ALA B1027     116.176  62.299 -12.138  1.00  0.00           H  
ATOM   1561  N   ILE B1028     115.070  65.289 -15.001  1.00 37.42           N  
ANISOU 1561  N   ILE B1028     3862   6132   4223   -440     -2   -932
ATOM   1562  CA  ILE B1028     114.437  65.425 -16.303  1.00 48.09           C  
ANISOU 1562  CA  ILE B1028     5137   7634   5499   -521      6  -1059
ATOM   1563  C   ILE B1028     115.540  65.349 -17.372  1.00 54.72           C  
ANISOU 1563  C   ILE B1028     5890   8632   6267   -544    -49  -1062
ATOM   1564  O   ILE B1028     116.562  66.035 -17.262  1.00 50.76           O  
ANISOU 1564  O   ILE B1028     5381   8195   5709   -501   -118   -931
ATOM   1565  CB  ILE B1028     113.664  66.760 -16.462  1.00 44.33           C  
ANISOU 1565  CB  ILE B1028     4668   7255   4917   -544     -6  -1042
ATOM   1566  CG1 ILE B1028     112.511  66.838 -15.441  1.00 42.92           C  
ANISOU 1566  CG1 ILE B1028     4562   6927   4818   -527     49  -1050
ATOM   1567  CG2 ILE B1028     113.106  66.916 -17.889  1.00 40.99           C  
ANISOU 1567  CG2 ILE B1028     4159   7016   4399   -637      2  -1181
ATOM   1568  CD1 ILE B1028     111.634  68.084 -15.615  1.00 47.96           C  
ANISOU 1568  CD1 ILE B1028     5201   7655   5366   -556     51  -1052
ATOM   1569  H   ILE B1028     115.496  66.128 -14.603  1.00  0.00           H  
ATOM   1570  N   GLU B1029     115.311  64.522 -18.393  1.00 65.26           N  
ANISOU 1570  N   GLU B1029     7153  10027   7614   -613    -19  -1211
ATOM   1571  CA  GLU B1029     116.219  64.330 -19.516  1.00 78.90           C  
ANISOU 1571  CA  GLU B1029     8786  11912   9279   -645    -73  -1232
ATOM   1572  C   GLU B1029     116.415  65.651 -20.269  1.00 84.04           C  
ANISOU 1572  C   GLU B1029     9389  12785   9755   -671   -150  -1172
ATOM   1573  O   GLU B1029     115.453  66.401 -20.451  1.00 54.55           O  
ANISOU 1573  O   GLU B1029     5665   9121   5939   -711   -135  -1209
ATOM   1574  CB  GLU B1029     115.717  63.230 -20.482  1.00 69.80           C  
ANISOU 1574  CB  GLU B1029     7560  10788   8171   -729    -19  -1428
ATOM   1575  CG  GLU B1029     115.143  61.952 -19.834  1.00 82.87           C  
ANISOU 1575  CG  GLU B1029     9257  12229  10000   -722     74  -1505
ATOM   1576  CD  GLU B1029     113.667  62.069 -19.448  1.00 91.68           C  
ANISOU 1576  CD  GLU B1029    10419  13255  11159   -744    146  -1577
ATOM   1577  OE1 GLU B1029     113.386  62.685 -18.402  1.00 70.07           O  
ANISOU 1577  OE1 GLU B1029     7765  10429   8429   -686    142  -1468
ATOM   1578  OE2 GLU B1029     112.827  61.533 -20.196  1.00106.94           O1-
ANISOU 1578  OE2 GLU B1029    12298  15204  13129   -820    209  -1746
ATOM   1579  H   GLU B1029     114.441  63.969 -18.406  1.00  0.00           H  
ATOM   1580  N   THR B1030     117.647  65.918 -20.712  1.00 81.56           N  
ANISOU 1580  N   THR B1030     9018  12581   9388   -647   -230  -1071
ATOM   1581  CA  THR B1030     117.947  67.098 -21.518  1.00 83.57           C  
ANISOU 1581  CA  THR B1030     9214  13062   9475   -672   -313   -991
ATOM   1582  C   THR B1030     117.025  67.158 -22.750  1.00 78.33           C  
ANISOU 1582  C   THR B1030     8485  12582   8695   -787   -296  -1161
ATOM   1583  O   THR B1030     116.788  66.122 -23.378  1.00 51.83           O  
ANISOU 1583  O   THR B1030     5078   9232   5383   -850   -254  -1330
ATOM   1584  CB  THR B1030     119.414  67.111 -22.012  1.00 85.60           C  
ANISOU 1584  CB  THR B1030     9392  13419   9710   -640   -400   -878
ATOM   1585  OG1 THR B1030     120.290  67.070 -20.892  1.00 94.97           O  
ANISOU 1585  OG1 THR B1030    10636  14434  11012   -536   -406   -729
ATOM   1586  CG2 THR B1030     119.755  68.353 -22.846  1.00 68.13           C  
ANISOU 1586  CG2 THR B1030     7112  11452   7321   -667   -491   -777
ATOM   1587  H   THR B1030     118.411  65.285 -20.529  1.00  0.00           H  
ATOM   1588  HG1 THR B1030     121.201  67.108 -21.220  1.00  0.00           H  
ATOM   1589  N   ASP B1031     116.472  68.347 -23.015  1.00 73.74           N  
ANISOU 1589  N   ASP B1031     7905  12142   7971   -817   -320  -1121
ATOM   1590  CA  ASP B1031     115.562  68.606 -24.136  1.00100.19           C  
ANISOU 1590  CA  ASP B1031    11195  15686  11186   -932   -300  -1279
ATOM   1591  C   ASP B1031     114.159  67.990 -23.968  1.00103.23           C  
ANISOU 1591  C   ASP B1031    11615  15948  11659   -983   -184  -1478
ATOM   1592  O   ASP B1031     113.282  68.288 -24.780  1.00 98.65           O  
ANISOU 1592  O   ASP B1031    10992  15508  10981  -1079   -149  -1624
ATOM   1593  CB  ASP B1031     116.164  68.228 -25.514  1.00109.71           C  
ANISOU 1593  CB  ASP B1031    12279  17102  12301  -1006   -357  -1357
ATOM   1594  CG  ASP B1031     117.493  68.915 -25.813  1.00120.30           C  
ANISOU 1594  CG  ASP B1031    13567  18593  13547   -962   -479  -1153
ATOM   1595  OD1 ASP B1031     117.608  70.131 -25.553  1.00112.75           O  
ANISOU 1595  OD1 ASP B1031    12638  17703  12498   -929   -524   -991
ATOM   1596  OD2 ASP B1031     118.388  68.254 -26.376  1.00115.39           O1-
ANISOU 1596  OD2 ASP B1031    12869  18020  12953   -962   -527  -1152
ATOM   1597  H   ASP B1031     116.706  69.145 -22.439  1.00  0.00           H  
ATOM   1598  N   LYS B1032     113.940  67.172 -22.932  1.00 79.47           N  
ANISOU 1598  N   LYS B1032     8677  12684   8833   -921   -121  -1483
ATOM   1599  CA  LYS B1032     112.626  66.668 -22.549  1.00 67.25           C  
ANISOU 1599  CA  LYS B1032     7166  10989   7394   -951    -12  -1632
ATOM   1600  C   LYS B1032     112.008  67.574 -21.480  1.00 52.85           C  
ANISOU 1600  C   LYS B1032     5434   9063   5583   -897      6  -1531
ATOM   1601  O   LYS B1032     112.710  68.394 -20.884  1.00 56.55           O  
ANISOU 1601  O   LYS B1032     5947   9531   6009   -827    -56  -1345
ATOM   1602  CB  LYS B1032     112.743  65.226 -22.029  1.00 70.69           C  
ANISOU 1602  CB  LYS B1032     7621  11213   8024   -920     43  -1687
ATOM   1603  CG  LYS B1032     113.301  64.244 -23.066  1.00 86.99           C  
ANISOU 1603  CG  LYS B1032     9592  13357  10101   -976     35  -1800
ATOM   1604  CD  LYS B1032     112.463  64.227 -24.345  1.00109.15           C  
ANISOU 1604  CD  LYS B1032    12313  16331  12827  -1100     73  -2009
ATOM   1605  CE  LYS B1032     112.534  62.882 -25.071  1.00111.01           C  
ANISOU 1605  CE  LYS B1032    12474  16539  13165  -1160    121  -2182
ATOM   1606  NZ  LYS B1032     111.512  62.792 -26.124  1.00106.23           N1+
ANISOU 1606  NZ  LYS B1032    11794  16047  12520  -1285    188  -2417
ATOM   1607  H   LYS B1032     114.698  66.958 -22.291  1.00  0.00           H  
ATOM   1608  HZ1 LYS B1032     110.594  62.728 -25.715  1.00  0.00           H  
ATOM   1609  HZ2 LYS B1032     111.547  63.600 -26.720  1.00  0.00           H  
ATOM   1610  HZ3 LYS B1032     111.668  61.972 -26.683  1.00  0.00           H  
ATOM   1611  N   GLU B1033     110.696  67.423 -21.268  1.00 52.14           N  
ANISOU 1611  N   GLU B1033     5365   8881   5563   -930     97  -1653
ATOM   1612  CA  GLU B1033     109.943  68.309 -20.380  1.00 63.25           C  
ANISOU 1612  CA  GLU B1033     6843  10212   6974   -894    119  -1578
ATOM   1613  C   GLU B1033     109.444  67.647 -19.092  1.00 57.07           C  
ANISOU 1613  C   GLU B1033     6137   9165   6380   -828    177  -1554
ATOM   1614  O   GLU B1033     109.031  68.373 -18.186  1.00 56.81           O  
ANISOU 1614  O   GLU B1033     6169   9054   6363   -781    179  -1459
ATOM   1615  CB  GLU B1033     108.767  68.957 -21.136  1.00 82.90           C  
ANISOU 1615  CB  GLU B1033     9292  12835   9370   -985    173  -1715
ATOM   1616  CG  GLU B1033     109.176  70.241 -21.883  1.00 92.73           C  
ANISOU 1616  CG  GLU B1033    10504  14333  10395  -1022    103  -1643
ATOM   1617  CD  GLU B1033     107.983  71.124 -22.238  1.00 99.98           C  
ANISOU 1617  CD  GLU B1033    11411  15348  11225  -1091    161  -1733
ATOM   1618  OE1 GLU B1033     107.149  71.390 -21.350  1.00104.22           O  
ANISOU 1618  OE1 GLU B1033    12007  15734  11858  -1057    218  -1719
ATOM   1619  OE2 GLU B1033     107.909  71.572 -23.399  1.00120.82           O1-
ANISOU 1619  OE2 GLU B1033    13982  18227  13696  -1184    150  -1816
ATOM   1620  H   GLU B1033     110.187  66.693 -21.746  1.00  0.00           H  
HETATM 1621  N   PTR B1034     109.463  66.316 -19.009  1.00 49.30           N  
ANISOU 1621  N   PTR B1034     5143   8051   5538   -826    221  -1632
HETATM 1622  CA  PTR B1034     108.885  65.624 -17.863  1.00 46.38           C  
ANISOU 1622  CA  PTR B1034     4837   7444   5342   -772    275  -1607
HETATM 1623  C   PTR B1034     109.583  64.296 -17.576  1.00 48.11           C  
ANISOU 1623  C   PTR B1034     5061   7536   5683   -740    285  -1600
HETATM 1624  O   PTR B1034     110.279  63.766 -18.439  1.00 47.09           O  
ANISOU 1624  O   PTR B1034     4875   7491   5525   -770    263  -1647
HETATM 1625  CB  PTR B1034     107.351  65.457 -17.995  1.00 63.29           C  
ANISOU 1625  CB  PTR B1034     6955   9523   7568   -824    373  -1755
HETATM 1626  CG  PTR B1034     106.910  64.631 -19.196  1.00 54.91           C  
ANISOU 1626  CG  PTR B1034     5804   8513   6545   -915    439  -1964
HETATM 1627  CD1 PTR B1034     106.563  65.270 -20.386  1.00 59.52           C  
ANISOU 1627  CD1 PTR B1034     6319   9298   6997  -1007    451  -2094
HETATM 1628  CD2 PTR B1034     106.836  63.240 -19.096  1.00 53.58           C  
ANISOU 1628  CD2 PTR B1034     5618   8192   6545   -914    496  -2031
HETATM 1629  CE1 PTR B1034     106.133  64.518 -21.472  1.00 66.99           C  
ANISOU 1629  CE1 PTR B1034     7177  10292   7981  -1099    517  -2304
HETATM 1630  CE2 PTR B1034     106.410  62.491 -20.185  1.00 66.56           C  
ANISOU 1630  CE2 PTR B1034     7175   9873   8241  -1002    564  -2231
HETATM 1631  CZ  PTR B1034     106.056  63.131 -21.362  1.00 59.12           C  
ANISOU 1631  CZ  PTR B1034     6162   9132   7168  -1096    575  -2376
HETATM 1632  OH  PTR B1034     105.645  62.360 -22.404  1.00 85.60           O  
ANISOU 1632  OH  PTR B1034     9425  12517  10579  -1190    649  -2590
HETATM 1633  P   PTR B1034     106.245  62.458 -23.986  1.00 81.89           P  
ANISOU 1633  P   PTR B1034     8864  12308   9942  -1289    609  -2717
HETATM 1634  O1P PTR B1034     107.765  62.468 -23.878  1.00 75.89           O  
ANISOU 1634  O1P PTR B1034     8132  11601   9101  -1223    492  -2537
HETATM 1635  O2P PTR B1034     105.725  61.215 -24.690  1.00 75.10           O1-
ANISOU 1635  O2P PTR B1034     7924  11368   9241  -1364    710  -2932
HETATM 1636  O3P PTR B1034     105.672  63.734 -24.583  1.00 57.67           O1-
ANISOU 1636  O3P PTR B1034     5778   9433   6699  -1350    606  -2772
HETATM 1637  H   PTR B1034     109.835  65.738 -19.750  1.00  0.00           H  
HETATM 1638  N   PTR B1035     109.330  63.771 -16.377  1.00 37.94           N  
ANISOU 1638  N   PTR B1035     3839   6049   4527   -682    315  -1533
HETATM 1639  CA  PTR B1035     109.717  62.433 -15.958  1.00 39.21           C  
ANISOU 1639  CA  PTR B1035     4011   6069   4817   -655    341  -1524
HETATM 1640  C   PTR B1035     108.444  61.587 -15.947  1.00 43.78           C  
ANISOU 1640  C   PTR B1035     4571   6511   5551   -685    436  -1634
HETATM 1641  O   PTR B1035     107.432  62.028 -15.400  1.00 40.27           O  
ANISOU 1641  O   PTR B1035     4153   5995   5152   -675    468  -1627
HETATM 1642  CB  PTR B1035     110.361  62.465 -14.554  1.00 44.53           C  
ANISOU 1642  CB  PTR B1035     4776   6627   5517   -566    300  -1349
HETATM 1643  CG  PTR B1035     110.680  61.073 -14.017  1.00 41.25           C  
ANISOU 1643  CG  PTR B1035     4378   6061   5232   -542    338  -1336
HETATM 1644  CD1 PTR B1035     109.837  60.466 -13.080  1.00 45.94           C  
ANISOU 1644  CD1 PTR B1035     5015   6485   5954   -519    390  -1312
HETATM 1645  CD2 PTR B1035     111.799  60.394 -14.493  1.00 42.62           C  
ANISOU 1645  CD2 PTR B1035     4522   6271   5401   -544    321  -1341
HETATM 1646  CE1 PTR B1035     110.123  59.184 -12.616  1.00 43.76           C  
ANISOU 1646  CE1 PTR B1035     4755   6083   5789   -501    425  -1288
HETATM 1647  CE2 PTR B1035     112.082  59.117 -14.023  1.00 46.35           C  
ANISOU 1647  CE2 PTR B1035     5010   6611   5990   -526    361  -1327
HETATM 1648  CZ  PTR B1035     111.242  58.507 -13.086  1.00 45.58           C  
ANISOU 1648  CZ  PTR B1035     4959   6348   6011   -505    415  -1298
HETATM 1649  OH  PTR B1035     111.479  57.246 -12.609  1.00 53.60           O  
ANISOU 1649  OH  PTR B1035     5990   7238   7134   -491    458  -1272
HETATM 1650  P   PTR B1035     112.693  56.157 -13.096  1.00 70.58           P  
ANISOU 1650  P   PTR B1035     8104   9405   9307   -501    466  -1294
HETATM 1651  O1P PTR B1035     112.396  54.860 -12.364  1.00 62.36           O  
ANISOU 1651  O1P PTR B1035     7088   8199   8404   -491    534  -1265
HETATM 1652  O2P PTR B1035     112.562  56.001 -14.613  1.00 65.01           O1-
ANISOU 1652  O2P PTR B1035     7298   8808   8594   -571    482  -1448
HETATM 1653  O3P PTR B1035     114.008  56.759 -12.612  1.00 51.35           O1-
ANISOU 1653  O3P PTR B1035     5709   7037   6764   -450    392  -1185
HETATM 1654  H   PTR B1035     108.741  64.287 -15.727  1.00  0.00           H  
ATOM   1655  N   THR B1036     108.515  60.388 -16.522  1.00 40.10           N  
ANISOU 1655  N   THR B1036     4052   6001   5181   -721    487  -1735
ATOM   1656  CA  THR B1036     107.419  59.441 -16.451  1.00 41.08           C  
ANISOU 1656  CA  THR B1036     4150   5974   5484   -747    586  -1832
ATOM   1657  C   THR B1036     107.580  58.527 -15.227  1.00 41.22           C  
ANISOU 1657  C   THR B1036     4230   5800   5630   -681    600  -1709
ATOM   1658  O   THR B1036     108.595  57.834 -15.117  1.00 45.28           O  
ANISOU 1658  O   THR B1036     4759   6295   6151   -657    578  -1653
ATOM   1659  CB  THR B1036     107.348  58.566 -17.717  1.00 57.11           C  
ANISOU 1659  CB  THR B1036     6082   8047   7567   -830    644  -2016
ATOM   1660  OG1 THR B1036     107.259  59.400 -18.860  1.00 60.83           O  
ANISOU 1660  OG1 THR B1036     6493   8720   7897   -900    626  -2132
ATOM   1661  CG2 THR B1036     106.141  57.625 -17.699  1.00 48.83           C  
ANISOU 1661  CG2 THR B1036     5000   6826   6727   -856    757  -2115
ATOM   1662  H   THR B1036     109.369  60.074 -16.960  1.00  0.00           H  
ATOM   1663  HG1 THR B1036     106.470  59.950 -18.772  1.00  0.00           H  
ATOM   1664  N   VAL B1037     106.565  58.528 -14.362  1.00 42.14           N  
ANISOU 1664  N   VAL B1037     4379   5783   5848   -653    638  -1667
ATOM   1665  CA  VAL B1037     106.534  57.764 -13.127  1.00 46.58           C  
ANISOU 1665  CA  VAL B1037     5002   6175   6518   -593    647  -1537
ATOM   1666  C   VAL B1037     106.085  56.316 -13.385  1.00 48.40           C  
ANISOU 1666  C   VAL B1037     5184   6270   6935   -619    735  -1602
ATOM   1667  O   VAL B1037     105.139  56.090 -14.142  1.00 50.63           O  
ANISOU 1667  O   VAL B1037     5393   6521   7320   -672    812  -1741
ATOM   1668  CB  VAL B1037     105.556  58.403 -12.111  1.00 59.05           C  
ANISOU 1668  CB  VAL B1037     6627   7677   8133   -555    644  -1455
ATOM   1669  CG1 VAL B1037     105.380  57.568 -10.835  1.00 61.65           C  
ANISOU 1669  CG1 VAL B1037     7007   7840   8576   -503    653  -1324
ATOM   1670  CG2 VAL B1037     105.981  59.831 -11.756  1.00 58.77           C  
ANISOU 1670  CG2 VAL B1037     6644   7758   7928   -526    560  -1375
ATOM   1671  H   VAL B1037     105.732  59.079 -14.569  1.00  0.00           H  
ATOM   1672  N   LYS B1038     106.758  55.374 -12.714  1.00 45.64           N  
ANISOU 1672  N   LYS B1038     4873   5836   6631   -583    730  -1502
ATOM   1673  CA  LYS B1038     106.426  53.956 -12.758  1.00 55.21           C  
ANISOU 1673  CA  LYS B1038     6047   6904   8024   -599    814  -1530
ATOM   1674  C   LYS B1038     105.830  53.519 -11.419  1.00 62.09           C  
ANISOU 1674  C   LYS B1038     6973   7618   8997   -545    825  -1380
ATOM   1675  O   LYS B1038     104.668  53.123 -11.376  1.00 62.11           O  
ANISOU 1675  O   LYS B1038     6937   7501   9158   -554    892  -1403
ATOM   1676  CB  LYS B1038     107.666  53.120 -13.130  1.00 60.72           C  
ANISOU 1676  CB  LYS B1038     6733   7632   8703   -611    810  -1537
ATOM   1677  CG  LYS B1038     108.109  53.289 -14.591  1.00 66.28           C  
ANISOU 1677  CG  LYS B1038     7358   8479   9345   -676    811  -1700
ATOM   1678  CD  LYS B1038     108.951  54.551 -14.805  1.00 76.39           C  
ANISOU 1678  CD  LYS B1038     8663   9941  10418   -663    713  -1673
ATOM   1679  CE  LYS B1038     109.531  54.653 -16.212  1.00 87.21           C  
ANISOU 1679  CE  LYS B1038     9951  11468  11717   -728    701  -1812
ATOM   1680  NZ  LYS B1038     110.475  55.780 -16.315  1.00 87.72           N1+
ANISOU 1680  NZ  LYS B1038    10036  11702  11589   -706    600  -1751
ATOM   1681  H   LYS B1038     107.533  55.646 -12.124  1.00  0.00           H  
ATOM   1682  HZ1 LYS B1038     111.267  55.697 -15.659  1.00  0.00           H  
ATOM   1683  HZ2 LYS B1038     110.843  55.824 -17.250  1.00  0.00           H  
ATOM   1684  HZ3 LYS B1038     110.000  56.644 -16.097  1.00  0.00           H  
ATOM   1685  N   ASP B1039     106.624  53.593 -10.346  1.00 40.67           N  
ANISOU 1685  N   ASP B1039     4345   4908   6196   -492    761  -1227
ATOM   1686  CA  ASP B1039     106.153  53.273  -9.000  1.00 50.96           C  
ANISOU 1686  CA  ASP B1039     5704   6091   7566   -445    757  -1076
ATOM   1687  C   ASP B1039     105.401  54.484  -8.421  1.00 47.53           C  
ANISOU 1687  C   ASP B1039     5298   5677   7083   -419    713  -1035
ATOM   1688  O   ASP B1039     105.991  55.557  -8.292  1.00 47.04           O  
ANISOU 1688  O   ASP B1039     5281   5722   6867   -402    642  -1009
ATOM   1689  CB  ASP B1039     107.314  52.857  -8.085  1.00 57.45           C  
ANISOU 1689  CB  ASP B1039     6603   6919   8306   -408    713   -945
ATOM   1690  CG  ASP B1039     106.837  52.360  -6.723  1.00 73.44           C  
ANISOU 1690  CG  ASP B1039     8680   8833  10388   -370    710   -790
ATOM   1691  OD1 ASP B1039     106.457  51.175  -6.646  1.00 90.60           O  
ANISOU 1691  OD1 ASP B1039    10827  10895  12700   -378    772   -757
ATOM   1692  OD2 ASP B1039     106.855  53.152  -5.763  1.00 80.15           O1-
ANISOU 1692  OD2 ASP B1039     9594   9714  11144   -335    644   -696
ATOM   1693  H   ASP B1039     107.578  53.912 -10.436  1.00  0.00           H  
ATOM   1694  N   ASP B1040     104.118  54.305  -8.107  1.00 43.74           N  
ANISOU 1694  N   ASP B1040     4784   5085   6747   -417    759  -1027
ATOM   1695  CA  ASP B1040     103.207  55.399  -7.752  1.00 44.35           C  
ANISOU 1695  CA  ASP B1040     4870   5173   6807   -399    730  -1007
ATOM   1696  C   ASP B1040     102.295  55.029  -6.571  1.00 45.30           C  
ANISOU 1696  C   ASP B1040     5003   5157   7050   -360    735   -873
ATOM   1697  O   ASP B1040     101.392  55.801  -6.235  1.00 36.11           O  
ANISOU 1697  O   ASP B1040     3831   3977   5913   -347    723   -857
ATOM   1698  CB  ASP B1040     102.341  55.849  -8.954  1.00 46.97           C  
ANISOU 1698  CB  ASP B1040     5119   5535   7190   -449    790  -1181
ATOM   1699  CG  ASP B1040     101.629  54.705  -9.690  1.00 52.59           C  
ANISOU 1699  CG  ASP B1040     5742   6129   8108   -488    898  -1282
ATOM   1700  OD1 ASP B1040     101.545  53.579  -9.155  1.00 43.00           O  
ANISOU 1700  OD1 ASP B1040     4531   4789   7016   -468    926  -1190
ATOM   1701  OD2 ASP B1040     101.112  54.959 -10.794  1.00 48.33           O1-
ANISOU 1701  OD2 ASP B1040     5130   5627   7607   -544    957  -1454
ATOM   1702  H   ASP B1040     103.661  53.417  -8.287  1.00  0.00           H  
ATOM   1703  N   ARG B1041     102.530  53.867  -5.956  1.00 54.25           N  
ANISOU 1703  N   ARG B1041     6155   6203   8252   -344    748   -770
ATOM   1704  CA  ARG B1041     101.669  53.275  -4.937  1.00 48.64           C  
ANISOU 1704  CA  ARG B1041     5442   5364   7674   -313    757   -633
ATOM   1705  C   ARG B1041     101.468  54.182  -3.704  1.00 60.01           C  
ANISOU 1705  C   ARG B1041     6944   6837   9017   -272    669   -509
ATOM   1706  O   ARG B1041     100.348  54.277  -3.205  1.00 47.29           O  
ANISOU 1706  O   ARG B1041     5304   5146   7515   -252    672   -445
ATOM   1707  CB  ARG B1041     102.259  51.904  -4.568  1.00 57.33           C  
ANISOU 1707  CB  ARG B1041     6563   6400   8817   -308    777   -534
ATOM   1708  CG  ARG B1041     101.563  51.166  -3.410  1.00 79.97           C  
ANISOU 1708  CG  ARG B1041     9434   9150  11799   -277    777   -359
ATOM   1709  CD  ARG B1041     102.147  49.767  -3.200  1.00 71.14           C  
ANISOU 1709  CD  ARG B1041     8332   7982  10716   -282    809   -273
ATOM   1710  NE  ARG B1041     103.618  49.805  -3.143  1.00102.55           N  
ANISOU 1710  NE  ARG B1041    12380  12075  14508   -289    770   -289
ATOM   1711  CZ  ARG B1041     104.453  48.997  -3.808  1.00114.99           C  
ANISOU 1711  CZ  ARG B1041    13944  13654  16090   -317    820   -347
ATOM   1712  NH1 ARG B1041     103.990  48.006  -4.569  1.00124.15           N  
ANISOU 1712  NH1 ARG B1041    15027  14708  17435   -343    912   -396
ATOM   1713  NH2 ARG B1041     105.765  49.179  -3.705  1.00 85.55           N1+
ANISOU 1713  NH2 ARG B1041    10278  10031  12195   -318    780   -354
ATOM   1714  H   ARG B1041     103.338  53.332  -6.241  1.00  0.00           H  
ATOM   1715  HE  ARG B1041     103.998  50.547  -2.564  1.00  0.00           H  
ATOM   1716 HH12 ARG B1041     104.606  47.392  -5.081  1.00  0.00           H  
ATOM   1717 HH11 ARG B1041     103.001  47.835  -4.657  1.00  0.00           H  
ATOM   1718 HH22 ARG B1041     106.419  48.616  -4.227  1.00  0.00           H  
ATOM   1719 HH21 ARG B1041     106.155  49.945  -3.179  1.00  0.00           H  
ATOM   1720  N   ASP B1042     102.542  54.842  -3.254  1.00 59.81           N  
ANISOU 1720  N   ASP B1042     6998   6927   8799   -261    594   -477
ATOM   1721  CA  ASP B1042     102.572  55.695  -2.057  1.00 48.00           C  
ANISOU 1721  CA  ASP B1042     5565   5469   7204   -228    511   -367
ATOM   1722  C   ASP B1042     102.787  57.169  -2.443  1.00 43.03           C  
ANISOU 1722  C   ASP B1042     4945   4941   6464   -231    473   -444
ATOM   1723  O   ASP B1042     103.524  57.887  -1.767  1.00 49.06           O  
ANISOU 1723  O   ASP B1042     5773   5770   7095   -212    401   -381
ATOM   1724  CB  ASP B1042     103.576  55.212  -0.973  1.00 85.27           C  
ANISOU 1724  CB  ASP B1042    10370  10230  11797   -213    458   -261
ATOM   1725  CG  ASP B1042     103.310  53.812  -0.421  1.00101.32           C  
ANISOU 1725  CG  ASP B1042    12399  12175  13922   -213    494   -165
ATOM   1726  OD1 ASP B1042     102.140  53.499  -0.121  1.00109.34           O  
ANISOU 1726  OD1 ASP B1042    13375  13094  15076   -202    512    -89
ATOM   1727  OD2 ASP B1042     104.291  53.090  -0.156  1.00 99.95           O1-
ANISOU 1727  OD2 ASP B1042    12260  12028  13687   -222    504   -159
ATOM   1728  H   ASP B1042     103.413  54.747  -3.758  1.00  0.00           H  
ATOM   1729  N   SER B1043     102.130  57.612  -3.523  1.00 34.14           N  
ANISOU 1729  N   SER B1043     3751   3827   5391   -259    525   -580
ATOM   1730  CA  SER B1043     102.089  59.019  -3.939  1.00 43.80           C  
ANISOU 1730  CA  SER B1043     4976   5152   6512   -268    497   -650
ATOM   1731  C   SER B1043     101.297  59.876  -2.919  1.00 38.91           C  
ANISOU 1731  C   SER B1043     4371   4509   5903   -241    455   -567
ATOM   1732  O   SER B1043     100.224  59.433  -2.494  1.00 33.85           O  
ANISOU 1732  O   SER B1043     3690   3759   5410   -228    481   -519
ATOM   1733  CB  SER B1043     101.366  59.103  -5.299  1.00 46.24           C  
ANISOU 1733  CB  SER B1043     5202   5483   6882   -314    571   -818
ATOM   1734  OG  SER B1043     102.103  58.445  -6.314  1.00 45.27           O  
ANISOU 1734  OG  SER B1043     5061   5406   6733   -346    601   -907
ATOM   1735  H   SER B1043     101.539  56.970  -4.033  1.00  0.00           H  
ATOM   1736  HG  SER B1043     101.840  57.508  -6.301  1.00  0.00           H  
ATOM   1737  N   PRO B1044     101.787  61.084  -2.558  1.00 33.90           N  
ANISOU 1737  N   PRO B1044     3787   3970   5123   -231    391   -545
ATOM   1738  CA  PRO B1044     100.974  62.065  -1.818  1.00 27.69           C  
ANISOU 1738  CA  PRO B1044     3008   3176   4336   -212    352   -488
ATOM   1739  C   PRO B1044      99.943  62.730  -2.756  1.00 26.74           C  
ANISOU 1739  C   PRO B1044     2814   3065   4277   -238    409   -604
ATOM   1740  O   PRO B1044     100.161  63.850  -3.217  1.00 24.32           O  
ANISOU 1740  O   PRO B1044     2514   2859   3867   -253    396   -658
ATOM   1741  CB  PRO B1044     102.036  63.036  -1.275  1.00 27.19           C  
ANISOU 1741  CB  PRO B1044     3020   3213   4098   -200    278   -443
ATOM   1742  CG  PRO B1044     103.119  63.048  -2.345  1.00 28.13           C  
ANISOU 1742  CG  PRO B1044     3138   3419   4132   -222    295   -530
ATOM   1743  CD  PRO B1044     103.120  61.613  -2.864  1.00 34.98           C  
ANISOU 1743  CD  PRO B1044     3969   4224   5098   -237    354   -572
ATOM   1744  N   VAL B1045      98.843  62.022  -3.059  1.00 29.22           N  
ANISOU 1744  N   VAL B1045     3057   3275   4768   -246    478   -642
ATOM   1745  CA  VAL B1045      97.929  62.387  -4.148  1.00 29.69           C  
ANISOU 1745  CA  VAL B1045     3037   3340   4902   -283    557   -788
ATOM   1746  C   VAL B1045      97.246  63.752  -3.948  1.00 24.04           C  
ANISOU 1746  C   VAL B1045     2313   2669   4152   -282    543   -796
ATOM   1747  O   VAL B1045      96.960  64.439  -4.925  1.00 30.83           O  
ANISOU 1747  O   VAL B1045     3133   3601   4980   -321    590   -923
ATOM   1748  CB  VAL B1045      96.829  61.317  -4.372  1.00 28.53           C  
ANISOU 1748  CB  VAL B1045     2805   3047   4987   -288    646   -825
ATOM   1749  CG1 VAL B1045      97.442  59.976  -4.787  1.00 33.16           C  
ANISOU 1749  CG1 VAL B1045     3391   3591   5615   -298    675   -834
ATOM   1750  CG2 VAL B1045      95.895  61.133  -3.169  1.00 28.72           C  
ANISOU 1750  CG2 VAL B1045     2816   2954   5141   -244    622   -688
ATOM   1751  H   VAL B1045      98.658  61.144  -2.589  1.00  0.00           H  
ATOM   1752  N   PHE B1046      97.048  64.153  -2.689  1.00 27.98           N  
ANISOU 1752  N   PHE B1046     2846   3132   4651   -243    478   -665
ATOM   1753  CA  PHE B1046      96.409  65.427  -2.373  1.00 29.29           C  
ANISOU 1753  CA  PHE B1046     3000   3331   4795   -242    465   -665
ATOM   1754  C   PHE B1046      97.331  66.647  -2.565  1.00 23.92           C  
ANISOU 1754  C   PHE B1046     2377   2795   3914   -254    416   -677
ATOM   1755  O   PHE B1046      96.858  67.779  -2.488  1.00 24.84           O  
ANISOU 1755  O   PHE B1046     2484   2953   3998   -261    412   -687
ATOM   1756  CB  PHE B1046      95.781  65.368  -0.972  1.00 33.96           C  
ANISOU 1756  CB  PHE B1046     3594   3832   5476   -201    415   -526
ATOM   1757  CG  PHE B1046      94.677  64.334  -0.855  1.00 32.93           C  
ANISOU 1757  CG  PHE B1046     3388   3559   5565   -188    470   -508
ATOM   1758  CD1 PHE B1046      93.499  64.476  -1.615  1.00 36.40           C  
ANISOU 1758  CD1 PHE B1046     3733   3942   6153   -208    563   -619
ATOM   1759  CD2 PHE B1046      94.845  63.185  -0.058  1.00 32.31           C  
ANISOU 1759  CD2 PHE B1046     3325   3400   5548   -159    436   -383
ATOM   1760  CE1 PHE B1046      92.508  63.508  -1.550  1.00 36.66           C  
ANISOU 1760  CE1 PHE B1046     3686   3829   6413   -194    622   -602
ATOM   1761  CE2 PHE B1046      93.838  62.231  -0.001  1.00 38.60           C  
ANISOU 1761  CE2 PHE B1046     4045   4061   6560   -145    488   -352
ATOM   1762  CZ  PHE B1046      92.674  62.394  -0.741  1.00 37.74           C  
ANISOU 1762  CZ  PHE B1046     3838   3882   6617   -160    582   -461
ATOM   1763  H   PHE B1046      97.318  63.551  -1.924  1.00  0.00           H  
ATOM   1764  N   TRP B1047      98.616  66.408  -2.841  1.00 23.74           N  
ANISOU 1764  N   TRP B1047     2405   2844   3769   -259    387   -678
ATOM   1765  CA  TRP B1047      99.601  67.422  -3.191  1.00 22.22           C  
ANISOU 1765  CA  TRP B1047     2255   2784   3401   -270    348   -687
ATOM   1766  C   TRP B1047      99.913  67.382  -4.701  1.00 23.71           C  
ANISOU 1766  C   TRP B1047     2407   3069   3534   -316    398   -818
ATOM   1767  O   TRP B1047     100.809  68.111  -5.125  1.00 23.13           O  
ANISOU 1767  O   TRP B1047     2354   3115   3317   -329    369   -826
ATOM   1768  CB  TRP B1047     100.876  67.212  -2.337  1.00 21.89           C  
ANISOU 1768  CB  TRP B1047     2294   2760   3262   -240    273   -584
ATOM   1769  CG  TRP B1047     100.764  67.503  -0.864  1.00 26.20           C  
ANISOU 1769  CG  TRP B1047     2887   3269   3798   -208    209   -465
ATOM   1770  CD1 TRP B1047     101.271  68.603  -0.257  1.00 23.60           C  
ANISOU 1770  CD1 TRP B1047     2605   3001   3359   -199    154   -412
ATOM   1771  CD2 TRP B1047     100.099  66.741   0.197  1.00 25.68           C  
ANISOU 1771  CD2 TRP B1047     2819   3097   3841   -184    190   -383
ATOM   1772  NE1 TRP B1047     100.983  68.569   1.092  1.00 25.91           N  
ANISOU 1772  NE1 TRP B1047     2925   3237   3682   -176    107   -319
ATOM   1773  CE2 TRP B1047     100.240  67.458   1.426  1.00 25.91           C  
ANISOU 1773  CE2 TRP B1047     2896   3142   3803   -167    120   -294
ATOM   1774  CE3 TRP B1047      99.391  65.514   0.257  1.00 29.05           C  
ANISOU 1774  CE3 TRP B1047     3202   3419   4414   -177    223   -368
ATOM   1775  CZ2 TRP B1047      99.691  66.997   2.635  1.00 23.75           C  
ANISOU 1775  CZ2 TRP B1047     2629   2800   3593   -147     78   -200
ATOM   1776  CZ3 TRP B1047      98.833  65.042   1.464  1.00 25.16           C  
ANISOU 1776  CZ3 TRP B1047     2716   2856   3988   -152    178   -256
ATOM   1777  CH2 TRP B1047      98.976  65.785   2.651  1.00 26.87           C  
ANISOU 1777  CH2 TRP B1047     2980   3104   4124   -139    105   -177
ATOM   1778  H   TRP B1047      98.939  65.449  -2.925  1.00  0.00           H  
ATOM   1779  HE1 TRP B1047     101.323  69.284   1.774  1.00  0.00           H  
ATOM   1780  N   TYR B1048      99.232  66.532  -5.490  1.00 25.25           N  
ANISOU 1780  N   TYR B1048     2537   3212   3843   -343    473   -920
ATOM   1781  CA  TYR B1048      99.625  66.225  -6.869  1.00 28.20           C  
ANISOU 1781  CA  TYR B1048     2876   3674   4164   -391    515  -1047
ATOM   1782  C   TYR B1048      98.751  66.896  -7.920  1.00 33.28           C  
ANISOU 1782  C   TYR B1048     3448   4391   4803   -448    586  -1195
ATOM   1783  O   TYR B1048      97.526  66.912  -7.802  1.00 34.08           O  
ANISOU 1783  O   TYR B1048     3499   4414   5035   -456    648  -1243
ATOM   1784  CB  TYR B1048      99.670  64.694  -7.073  1.00 30.10           C  
ANISOU 1784  CB  TYR B1048     3091   3818   4525   -393    556  -1077
ATOM   1785  CG  TYR B1048     101.033  64.058  -6.860  1.00 30.04           C  
ANISOU 1785  CG  TYR B1048     3140   3834   4437   -372    501  -1008
ATOM   1786  CD1 TYR B1048     102.053  64.742  -6.166  1.00 26.38           C  
ANISOU 1786  CD1 TYR B1048     2751   3433   3836   -339    417   -898
ATOM   1787  CD2 TYR B1048     101.297  62.771  -7.373  1.00 33.29           C  
ANISOU 1787  CD2 TYR B1048     3526   4197   4922   -386    541  -1055
ATOM   1788  CE1 TYR B1048     103.316  64.171  -6.003  1.00 28.24           C  
ANISOU 1788  CE1 TYR B1048     3032   3685   4010   -321    377   -844
ATOM   1789  CE2 TYR B1048     102.568  62.189  -7.199  1.00 31.31           C  
ANISOU 1789  CE2 TYR B1048     3323   3969   4603   -369    497   -995
ATOM   1790  CZ  TYR B1048     103.575  62.892  -6.512  1.00 31.24           C  
ANISOU 1790  CZ  TYR B1048     3386   4023   4457   -335    416   -891
ATOM   1791  OH  TYR B1048     104.805  62.344  -6.341  1.00 30.30           O  
ANISOU 1791  OH  TYR B1048     3310   3922   4280   -318    381   -838
ATOM   1792  H   TYR B1048      98.437  66.014  -5.130  1.00  0.00           H  
ATOM   1793  HH  TYR B1048     105.391  62.963  -5.857  1.00  0.00           H  
ATOM   1794  N   ALA B1049      99.426  67.390  -8.965  1.00 28.10           N  
ANISOU 1794  N   ALA B1049     2786   3892   3997   -490    579  -1266
ATOM   1795  CA  ALA B1049      98.787  67.963 -10.138  1.00 35.98           C  
ANISOU 1795  CA  ALA B1049     3718   4996   4956   -558    647  -1419
ATOM   1796  C   ALA B1049      98.003  66.904 -10.942  1.00 35.88           C  
ANISOU 1796  C   ALA B1049     3624   4912   5094   -604    748  -1580
ATOM   1797  O   ALA B1049      98.339  65.716 -10.866  1.00 30.09           O  
ANISOU 1797  O   ALA B1049     2890   4087   4457   -589    756  -1573
ATOM   1798  CB  ALA B1049      99.858  68.621 -11.001  1.00 29.80           C  
ANISOU 1798  CB  ALA B1049     2945   4408   3967   -593    602  -1438
ATOM   1799  H   ALA B1049     100.433  67.329  -8.994  1.00  0.00           H  
ATOM   1800  N   PRO B1050      96.980  67.340 -11.710  1.00 38.10           N  
ANISOU 1800  N   PRO B1050     3836   5233   5406   -663    834  -1728
ATOM   1801  CA  PRO B1050      96.186  66.445 -12.562  1.00 44.38           C  
ANISOU 1801  CA  PRO B1050     4545   5961   6354   -716    945  -1904
ATOM   1802  C   PRO B1050      96.992  65.524 -13.482  1.00 37.30           C  
ANISOU 1802  C   PRO B1050     3628   5119   5423   -755    950  -1990
ATOM   1803  O   PRO B1050      96.711  64.331 -13.519  1.00 43.51           O  
ANISOU 1803  O   PRO B1050     4378   5771   6381   -755   1004  -2036
ATOM   1804  CB  PRO B1050      95.317  67.400 -13.379  1.00 49.78           C  
ANISOU 1804  CB  PRO B1050     5170   6755   6989   -787   1020  -2057
ATOM   1805  CG  PRO B1050      95.150  68.615 -12.501  1.00 49.57           C  
ANISOU 1805  CG  PRO B1050     5191   6747   6894   -745    969  -1927
ATOM   1806  CD  PRO B1050      96.473  68.708 -11.772  1.00 44.71           C  
ANISOU 1806  CD  PRO B1050     4669   6169   6150   -685    842  -1741
ATOM   1807  N   GLU B1051      97.983  66.055 -14.204  1.00 41.46           N  
ANISOU 1807  N   GLU B1051     4174   5840   5739   -788    893  -2004
ATOM   1808  CA  GLU B1051      98.815  65.277 -15.120  1.00 44.51           C  
ANISOU 1808  CA  GLU B1051     4534   6297   6079   -828    888  -2084
ATOM   1809  C   GLU B1051      99.577  64.132 -14.427  1.00 49.80           C  
ANISOU 1809  C   GLU B1051     5247   6839   6835   -767    846  -1968
ATOM   1810  O   GLU B1051      99.795  63.084 -15.038  1.00 49.81           O  
ANISOU 1810  O   GLU B1051     5208   6815   6901   -798    881  -2054
ATOM   1811  CB  GLU B1051      99.780  66.192 -15.896  1.00 49.01           C  
ANISOU 1811  CB  GLU B1051     5115   7106   6400   -866    818  -2086
ATOM   1812  CG  GLU B1051     100.886  66.873 -15.057  1.00 45.90           C  
ANISOU 1812  CG  GLU B1051     4808   6756   5876   -795    699  -1878
ATOM   1813  CD  GLU B1051     100.466  68.148 -14.331  1.00 46.24           C  
ANISOU 1813  CD  GLU B1051     4890   6822   5857   -768    676  -1785
ATOM   1814  OE1 GLU B1051      99.253  68.439 -14.234  1.00 39.71           O  
ANISOU 1814  OE1 GLU B1051     4032   5932   5122   -785    749  -1853
ATOM   1815  OE2 GLU B1051     101.369  68.877 -13.866  1.00 39.72           O1-
ANISOU 1815  OE2 GLU B1051     4120   6071   4898   -729    587  -1643
ATOM   1816  H   GLU B1051      98.222  67.054 -14.126  1.00  0.00           H  
ATOM   1817  N   CYS B1052      99.936  64.331 -13.155  1.00 36.51           N  
ANISOU 1817  N   CYS B1052     3642   5080   5149   -687    774  -1778
ATOM   1818  CA  CYS B1052     100.594  63.325 -12.338  1.00 31.10           C  
ANISOU 1818  CA  CYS B1052     3002   4273   4539   -630    738  -1661
ATOM   1819  C   CYS B1052      99.589  62.235 -11.957  1.00 34.38           C  
ANISOU 1819  C   CYS B1052     3379   4493   5190   -620    819  -1684
ATOM   1820  O   CYS B1052      99.899  61.050 -12.062  1.00 49.73           O  
ANISOU 1820  O   CYS B1052     5309   6354   7231   -618    843  -1691
ATOM   1821  CB  CYS B1052     101.196  63.905 -11.049  1.00 34.75           C  
ANISOU 1821  CB  CYS B1052     3556   4720   4926   -555    644  -1464
ATOM   1822  SG  CYS B1052     102.086  65.461 -11.339  1.00 44.14           S  
ANISOU 1822  SG  CYS B1052     4785   6113   5871   -558    558  -1413
ATOM   1823  H   CYS B1052      99.737  65.219 -12.709  1.00  0.00           H  
ATOM   1824  HG  CYS B1052     102.764  65.175 -12.462  1.00  0.00           H  
ATOM   1825  N   LEU B1053      98.388  62.659 -11.543  1.00 37.97           N  
ANISOU 1825  N   LEU B1053     3810   4871   5744   -612    862  -1691
ATOM   1826  CA  LEU B1053      97.316  61.762 -11.130  1.00 35.86           C  
ANISOU 1826  CA  LEU B1053     3498   4409   5717   -595    935  -1691
ATOM   1827  C   LEU B1053      96.760  60.943 -12.303  1.00 53.18           C  
ANISOU 1827  C   LEU B1053     5594   6563   8047   -663   1051  -1887
ATOM   1828  O   LEU B1053      96.436  59.769 -12.125  1.00 46.54           O  
ANISOU 1828  O   LEU B1053     4719   5567   7396   -652   1105  -1882
ATOM   1829  CB  LEU B1053      96.173  62.565 -10.477  1.00 38.03           C  
ANISOU 1829  CB  LEU B1053     3761   4623   6064   -571    951  -1653
ATOM   1830  CG  LEU B1053      96.483  63.202  -9.110  1.00 37.03           C  
ANISOU 1830  CG  LEU B1053     3717   4485   5868   -501    851  -1456
ATOM   1831  CD1 LEU B1053      95.316  64.088  -8.670  1.00 31.54           C  
ANISOU 1831  CD1 LEU B1053     2991   3752   5240   -492    878  -1454
ATOM   1832  CD2 LEU B1053      96.765  62.153  -8.035  1.00 34.07           C  
ANISOU 1832  CD2 LEU B1053     3379   3973   5590   -443    814  -1302
ATOM   1833  H   LEU B1053      98.189  63.655 -11.536  1.00  0.00           H  
ATOM   1834  N   MET B1054      96.637  61.574 -13.472  1.00 44.74           N  
ANISOU 1834  N   MET B1054     4478   5638   6880   -737   1090  -2060
ATOM   1835  CA  MET B1054      95.977  60.974 -14.623  1.00 54.98           C  
ANISOU 1835  CA  MET B1054     5675   6910   8303   -815   1209  -2277
ATOM   1836  C   MET B1054      96.948  60.159 -15.479  1.00 52.45           C  
ANISOU 1836  C   MET B1054     5339   6658   7932   -859   1205  -2355
ATOM   1837  O   MET B1054      96.590  59.055 -15.890  1.00 64.62           O  
ANISOU 1837  O   MET B1054     6817   8079   9654   -886   1289  -2446
ATOM   1838  CB  MET B1054      95.306  62.057 -15.477  1.00 53.83           C  
ANISOU 1838  CB  MET B1054     5479   6898   8075   -887   1264  -2444
ATOM   1839  CG  MET B1054      94.182  62.807 -14.752  1.00 57.63           C  
ANISOU 1839  CG  MET B1054     5954   7299   8642   -855   1293  -2400
ATOM   1840  SD  MET B1054      93.342  64.056 -15.768  1.00 63.69           S  
ANISOU 1840  SD  MET B1054     6661   8228   9308   -945   1370  -2601
ATOM   1841  CE  MET B1054      94.756  64.983 -16.428  1.00 71.08           C  
ANISOU 1841  CE  MET B1054     7657   9454   9894   -982   1258  -2583
ATOM   1842  H   MET B1054      96.922  62.552 -13.543  1.00  0.00           H  
ATOM   1843  N   GLN B1055      98.132  60.716 -15.768  1.00 55.42           N  
ANISOU 1843  N   GLN B1055     5763   7218   8072   -865   1110  -2317
ATOM   1844  CA  GLN B1055      99.039  60.162 -16.776  1.00 60.90           C  
ANISOU 1844  CA  GLN B1055     6430   8015   8692   -917   1100  -2408
ATOM   1845  C   GLN B1055     100.403  59.753 -16.234  1.00 63.39           C  
ANISOU 1845  C   GLN B1055     6818   8342   8925   -858   1001  -2243
ATOM   1846  O   GLN B1055     101.150  59.110 -16.970  1.00 59.95           O  
ANISOU 1846  O   GLN B1055     6354   7962   8459   -893    996  -2305
ATOM   1847  CB  GLN B1055      99.254  61.171 -17.908  1.00 56.58           C  
ANISOU 1847  CB  GLN B1055     5850   7709   7938   -996   1086  -2543
ATOM   1848  CG  GLN B1055      97.973  61.455 -18.693  1.00 70.45           C  
ANISOU 1848  CG  GLN B1055     7523   9481   9765  -1077   1200  -2752
ATOM   1849  CD  GLN B1055      98.188  62.590 -19.679  1.00 92.45           C  
ANISOU 1849  CD  GLN B1055    10287  12525  12312  -1153   1175  -2855
ATOM   1850  OE1 GLN B1055      98.309  63.749 -19.291  1.00 89.03           O  
ANISOU 1850  OE1 GLN B1055     9907  12192  11729  -1125   1112  -2750
ATOM   1851  NE2 GLN B1055      98.245  62.265 -20.962  1.00 99.41           N  
ANISOU 1851  NE2 GLN B1055    11089  13524  13157  -1253   1225  -3061
ATOM   1852  H   GLN B1055      98.394  61.608 -15.360  1.00  0.00           H  
ATOM   1853 HE22 GLN B1055      98.371  62.974 -21.669  1.00  0.00           H  
ATOM   1854 HE21 GLN B1055      98.142  61.302 -21.253  1.00  0.00           H  
ATOM   1855  N   SER B1056     100.721  60.096 -14.981  1.00 55.11           N  
ANISOU 1855  N   SER B1056     5856   7243   7840   -775    926  -2044
ATOM   1856  CA  SER B1056     102.000  59.759 -14.343  1.00 50.88           C  
ANISOU 1856  CA  SER B1056     5390   6712   7226   -720    839  -1890
ATOM   1857  C   SER B1056     103.180  60.527 -14.982  1.00 47.32           C  
ANISOU 1857  C   SER B1056     4952   6471   6553   -740    758  -1893
ATOM   1858  O   SER B1056     104.295  60.008 -15.014  1.00 50.15           O  
ANISOU 1858  O   SER B1056     5327   6859   6866   -726    714  -1846
ATOM   1859  CB  SER B1056     102.234  58.227 -14.399  1.00 61.59           C  
ANISOU 1859  CB  SER B1056     6722   7943   8734   -721    886  -1905
ATOM   1860  OG  SER B1056     101.041  57.498 -14.145  1.00 62.73           O  
ANISOU 1860  OG  SER B1056     6821   7910   9103   -724    981  -1944
ATOM   1861  H   SER B1056     100.067  60.627 -14.421  1.00  0.00           H  
ATOM   1862  HG  SER B1056     100.419  57.738 -14.844  1.00  0.00           H  
ATOM   1863  N   LYS B1057     102.924  61.732 -15.501  1.00 46.89           N  
ANISOU 1863  N   LYS B1057     4886   6563   6366   -772    741  -1942
ATOM   1864  CA  LYS B1057     103.962  62.612 -16.031  1.00 49.91           C  
ANISOU 1864  CA  LYS B1057     5279   7148   6534   -785    657  -1913
ATOM   1865  C   LYS B1057     104.271  63.698 -14.998  1.00 47.35           C  
ANISOU 1865  C   LYS B1057     5037   6840   6114   -717    578  -1736
ATOM   1866  O   LYS B1057     103.341  64.198 -14.365  1.00 56.82           O  
ANISOU 1866  O   LYS B1057     6257   7973   7358   -699    601  -1708
ATOM   1867  CB  LYS B1057     103.473  63.265 -17.328  1.00 52.85           C  
ANISOU 1867  CB  LYS B1057     5577   7696   6806   -877    691  -2083
ATOM   1868  CG  LYS B1057     103.174  62.256 -18.441  1.00 62.37           C  
ANISOU 1868  CG  LYS B1057     6692   8905   8100   -958    771  -2284
ATOM   1869  CD  LYS B1057     102.850  62.968 -19.756  1.00 64.65           C  
ANISOU 1869  CD  LYS B1057     6908   9402   8252  -1059    795  -2455
ATOM   1870  CE  LYS B1057     102.787  61.995 -20.938  1.00 74.95           C  
ANISOU 1870  CE  LYS B1057     8120  10742   9615  -1147    859  -2659
ATOM   1871  NZ  LYS B1057     102.742  62.707 -22.226  1.00 67.56           N1+
ANISOU 1871  NZ  LYS B1057     7114  10054   8499  -1252    859  -2815
ATOM   1872  H   LYS B1057     101.986  62.112 -15.459  1.00  0.00           H  
ATOM   1873  HZ1 LYS B1057     103.585  63.253 -22.338  1.00  0.00           H  
ATOM   1874  HZ2 LYS B1057     102.711  62.042 -22.981  1.00  0.00           H  
ATOM   1875  HZ3 LYS B1057     101.935  63.303 -22.281  1.00  0.00           H  
ATOM   1876  N   PHE B1058     105.550  64.055 -14.858  1.00 41.72           N  
ANISOU 1876  N   PHE B1058     4363   6209   5278   -682    490  -1622
ATOM   1877  CA  PHE B1058     105.986  65.015 -13.850  1.00 35.07           C  
ANISOU 1877  CA  PHE B1058     3596   5372   4355   -618    419  -1455
ATOM   1878  C   PHE B1058     106.859  66.108 -14.464  1.00 32.11           C  
ANISOU 1878  C   PHE B1058     3216   5191   3792   -628    346  -1408
ATOM   1879  O   PHE B1058     107.992  65.833 -14.861  1.00 33.70           O  
ANISOU 1879  O   PHE B1058     3407   5466   3932   -622    296  -1375
ATOM   1880  CB  PHE B1058     106.745  64.279 -12.736  1.00 39.95           C  
ANISOU 1880  CB  PHE B1058     4281   5855   5042   -546    386  -1322
ATOM   1881  CG  PHE B1058     106.251  64.684 -11.375  1.00 41.48           C  
ANISOU 1881  CG  PHE B1058     4540   5934   5284   -492    375  -1211
ATOM   1882  CD1 PHE B1058     106.638  65.917 -10.812  1.00 37.72           C  
ANISOU 1882  CD1 PHE B1058     4114   5510   4706   -456    311  -1098
ATOM   1883  CD2 PHE B1058     105.267  63.908 -10.743  1.00 48.25           C  
ANISOU 1883  CD2 PHE B1058     5402   6634   6297   -481    429  -1221
ATOM   1884  CE1 PHE B1058     106.110  66.307  -9.589  1.00 44.39           C  
ANISOU 1884  CE1 PHE B1058     5013   6253   5598   -414    301  -1005
ATOM   1885  CE2 PHE B1058     104.756  64.313  -9.522  1.00 54.83           C  
ANISOU 1885  CE2 PHE B1058     6287   7372   7174   -435    413  -1118
ATOM   1886  CZ  PHE B1058     105.172  65.506  -8.948  1.00 47.94           C  
ANISOU 1886  CZ  PHE B1058     5465   6557   6193   -404    348  -1016
ATOM   1887  H   PHE B1058     106.275  63.552 -15.364  1.00  0.00           H  
ATOM   1888  N   TYR B1059     106.318  67.322 -14.512  1.00 29.84           N  
ANISOU 1888  N   TYR B1059     2932   4981   3423   -642    341  -1396
ATOM   1889  CA  TYR B1059     106.982  68.517 -15.020  1.00 36.96           C  
ANISOU 1889  CA  TYR B1059     3825   6069   4146   -654    277  -1334
ATOM   1890  C   TYR B1059     107.471  69.348 -13.832  1.00 37.16           C  
ANISOU 1890  C   TYR B1059     3926   6042   4148   -581    219  -1155
ATOM   1891  O   TYR B1059     106.975  69.187 -12.717  1.00 32.89           O  
ANISOU 1891  O   TYR B1059     3437   5345   3713   -538    238  -1107
ATOM   1892  CB  TYR B1059     105.977  69.366 -15.839  1.00 45.28           C  
ANISOU 1892  CB  TYR B1059     4830   7257   5117   -729    320  -1444
ATOM   1893  CG  TYR B1059     105.254  68.648 -16.968  1.00 41.70           C  
ANISOU 1893  CG  TYR B1059     4296   6850   4695   -816    397  -1654
ATOM   1894  CD1 TYR B1059     104.254  67.698 -16.679  1.00 49.09           C  
ANISOU 1894  CD1 TYR B1059     5221   7618   5813   -823    484  -1757
ATOM   1895  CD2 TYR B1059     105.556  68.938 -18.314  1.00 53.74           C  
ANISOU 1895  CD2 TYR B1059     5753   8591   6074   -895    385  -1749
ATOM   1896  CE1 TYR B1059     103.592  67.017 -17.712  1.00 47.44           C  
ANISOU 1896  CE1 TYR B1059     4932   7436   5654   -904    565  -1958
ATOM   1897  CE2 TYR B1059     104.878  68.270 -19.351  1.00 52.09           C  
ANISOU 1897  CE2 TYR B1059     5466   8427   5896   -983    461  -1959
ATOM   1898  CZ  TYR B1059     103.901  67.304 -19.049  1.00 56.50           C  
ANISOU 1898  CZ  TYR B1059     6015   8798   6652   -986    555  -2067
ATOM   1899  OH  TYR B1059     103.246  66.646 -20.046  1.00 56.56           O  
ANISOU 1899  OH  TYR B1059     5942   8833   6716  -1075    641  -2283
ATOM   1900  H   TYR B1059     105.396  67.476 -14.104  1.00  0.00           H  
ATOM   1901  HH  TYR B1059     103.550  66.931 -20.916  1.00  0.00           H  
ATOM   1902  N   ILE B1060     108.353  70.321 -14.090  1.00 32.35           N  
ANISOU 1902  N   ILE B1060     3317   5565   3406   -570    151  -1055
ATOM   1903  CA  ILE B1060     108.646  71.384 -13.120  1.00 36.45           C  
ANISOU 1903  CA  ILE B1060     3896   6053   3898   -513    107   -897
ATOM   1904  C   ILE B1060     107.364  72.126 -12.669  1.00 45.80           C  
ANISOU 1904  C   ILE B1060     5097   7196   5106   -527    152   -919
ATOM   1905  O   ILE B1060     107.226  72.472 -11.497  1.00 30.79           O  
ANISOU 1905  O   ILE B1060     3254   5179   3264   -476    141   -825
ATOM   1906  CB  ILE B1060     109.664  72.416 -13.678  1.00 39.14           C  
ANISOU 1906  CB  ILE B1060     4216   6560   4095   -512     38   -794
ATOM   1907  CG1 ILE B1060     111.054  71.763 -13.804  1.00 43.41           C  
ANISOU 1907  CG1 ILE B1060     4749   7101   4644   -476    -13   -736
ATOM   1908  CG2 ILE B1060     109.772  73.690 -12.818  1.00 38.54           C  
ANISOU 1908  CG2 ILE B1060     4190   6456   3996   -468      9   -651
ATOM   1909  CD1 ILE B1060     112.078  72.624 -14.546  1.00 46.63           C  
ANISOU 1909  CD1 ILE B1060     5114   7679   4923   -477    -82   -636
ATOM   1910  H   ILE B1060     108.805  70.372 -14.992  1.00  0.00           H  
ATOM   1911  N   ALA B1061     106.425  72.315 -13.606  1.00 32.99           N  
ANISOU 1911  N   ALA B1061     3419   5672   3442   -599    206  -1051
ATOM   1912  CA  ALA B1061     105.112  72.886 -13.324  1.00 31.43           C  
ANISOU 1912  CA  ALA B1061     3221   5441   3278   -621    264  -1099
ATOM   1913  C   ALA B1061     104.264  72.033 -12.363  1.00 27.54           C  
ANISOU 1913  C   ALA B1061     2755   4738   2968   -588    311  -1127
ATOM   1914  O   ALA B1061     103.370  72.568 -11.708  1.00 29.76           O  
ANISOU 1914  O   ALA B1061     3052   4949   3305   -577    340  -1110
ATOM   1915  CB  ALA B1061     104.360  73.094 -14.639  1.00 27.93           C  
ANISOU 1915  CB  ALA B1061     2704   5151   2757   -715    323  -1260
ATOM   1916  H   ALA B1061     106.607  72.016 -14.552  1.00  0.00           H  
ATOM   1917  N   SER B1062     104.531  70.728 -12.289  1.00 26.83           N  
ANISOU 1917  N   SER B1062     2664   4555   2975   -574    321  -1165
ATOM   1918  CA  SER B1062     103.880  69.839 -11.330  1.00 30.28           C  
ANISOU 1918  CA  SER B1062     3124   4796   3585   -539    358  -1166
ATOM   1919  C   SER B1062     104.388  70.092  -9.896  1.00 27.53           C  
ANISOU 1919  C   SER B1062     2854   4343   3260   -464    298  -1001
ATOM   1920  O   SER B1062     103.602  70.019  -8.954  1.00 28.78           O  
ANISOU 1920  O   SER B1062     3034   4372   3526   -438    316   -972
ATOM   1921  CB  SER B1062     104.105  68.374 -11.725  1.00 38.65           C  
ANISOU 1921  CB  SER B1062     4159   5790   4736   -549    387  -1243
ATOM   1922  OG  SER B1062     103.771  68.121 -13.083  1.00 38.13           O  
ANISOU 1922  OG  SER B1062     4015   5823   4648   -625    442  -1408
ATOM   1923  H   SER B1062     105.253  70.308 -12.862  1.00  0.00           H  
ATOM   1924  HG  SER B1062     102.823  68.359 -13.234  1.00  0.00           H  
ATOM   1925  N   ASP B1063     105.674  70.443  -9.747  1.00 27.93           N  
ANISOU 1925  N   ASP B1063     2939   4451   3219   -433    229   -898
ATOM   1926  CA  ASP B1063     106.234  70.944  -8.486  1.00 23.82           C  
ANISOU 1926  CA  ASP B1063     2490   3855   2705   -372    176   -753
ATOM   1927  C   ASP B1063     105.651  72.298  -8.084  1.00 29.46           C  
ANISOU 1927  C   ASP B1063     3213   4598   3380   -373    171   -706
ATOM   1928  O   ASP B1063     105.457  72.538  -6.892  1.00 21.63           O  
ANISOU 1928  O   ASP B1063     2267   3508   2444   -336    155   -629
ATOM   1929  CB  ASP B1063     107.773  71.034  -8.474  1.00 23.93           C  
ANISOU 1929  CB  ASP B1063     2527   3920   2643   -341    114   -664
ATOM   1930  CG  ASP B1063     108.490  69.706  -8.231  1.00 31.76           C  
ANISOU 1930  CG  ASP B1063     3538   4827   3702   -315    110   -663
ATOM   1931  OD1 ASP B1063     107.928  68.805  -7.573  1.00 28.75           O  
ANISOU 1931  OD1 ASP B1063     3174   4322   3426   -306    141   -684
ATOM   1932  OD2 ASP B1063     109.670  69.621  -8.624  1.00 29.82           O1-
ANISOU 1932  OD2 ASP B1063     3285   4641   3404   -304     76   -631
ATOM   1933  H   ASP B1063     106.283  70.459 -10.555  1.00  0.00           H  
ATOM   1934  N   VAL B1064     105.352  73.162  -9.062  1.00 24.11           N  
ANISOU 1934  N   VAL B1064     2492   4062   2606   -420    188   -754
ATOM   1935  CA  VAL B1064     104.664  74.420  -8.785  1.00 24.44           C  
ANISOU 1935  CA  VAL B1064     2536   4132   2616   -429    197   -718
ATOM   1936  C   VAL B1064     103.281  74.182  -8.141  1.00 25.93           C  
ANISOU 1936  C   VAL B1064     2721   4196   2936   -429    250   -769
ATOM   1937  O   VAL B1064     102.945  74.850  -7.164  1.00 26.23           O  
ANISOU 1937  O   VAL B1064     2790   4167   3010   -401    236   -693
ATOM   1938  CB  VAL B1064     104.515  75.312 -10.041  1.00 27.45           C  
ANISOU 1938  CB  VAL B1064     2865   4702   2861   -490    215   -769
ATOM   1939  CG1 VAL B1064     103.572  76.500  -9.816  1.00 26.34           C  
ANISOU 1939  CG1 VAL B1064     2720   4579   2706   -508    246   -757
ATOM   1940  CG2 VAL B1064     105.885  75.825 -10.494  1.00 26.30           C  
ANISOU 1940  CG2 VAL B1064     2725   4675   2592   -477    147   -668
ATOM   1941  H   VAL B1064     105.587  72.939 -10.022  1.00  0.00           H  
ATOM   1942  N   TRP B1065     102.522  73.214  -8.670  1.00 25.23           N  
ANISOU 1942  N   TRP B1065     2588   4069   2928   -460    311   -896
ATOM   1943  CA  TRP B1065     101.245  72.803  -8.094  1.00 24.31           C  
ANISOU 1943  CA  TRP B1065     2452   3823   2960   -457    365   -944
ATOM   1944  C   TRP B1065     101.391  72.382  -6.629  1.00 29.38           C  
ANISOU 1944  C   TRP B1065     3149   4314   3697   -394    322   -832
ATOM   1945  O   TRP B1065     100.647  72.865  -5.771  1.00 22.23           O  
ANISOU 1945  O   TRP B1065     2252   3334   2861   -376    324   -788
ATOM   1946  CB  TRP B1065     100.620  71.670  -8.921  1.00 25.93           C  
ANISOU 1946  CB  TRP B1065     2598   3998   3254   -496    437  -1090
ATOM   1947  CG  TRP B1065      99.320  71.129  -8.390  1.00 25.08           C  
ANISOU 1947  CG  TRP B1065     2461   3741   3327   -488    497  -1132
ATOM   1948  CD1 TRP B1065      99.151  70.403  -7.256  1.00 32.84           C  
ANISOU 1948  CD1 TRP B1065     3471   4563   4442   -435    477  -1048
ATOM   1949  CD2 TRP B1065      97.987  71.294  -8.943  1.00 28.79           C  
ANISOU 1949  CD2 TRP B1065     2858   4205   3875   -536    591  -1265
ATOM   1950  NE1 TRP B1065      97.818  70.144  -7.050  1.00 33.16           N  
ANISOU 1950  NE1 TRP B1065     3459   4498   4641   -441    544  -1104
ATOM   1951  CE2 TRP B1065      97.053  70.664  -8.063  1.00 33.08           C  
ANISOU 1951  CE2 TRP B1065     3387   4565   4616   -499    619  -1239
ATOM   1952  CE3 TRP B1065      97.474  71.902 -10.108  1.00 38.57           C  
ANISOU 1952  CE3 TRP B1065     4039   5570   5043   -606    656  -1400
ATOM   1953  CZ2 TRP B1065      95.677  70.649  -8.315  1.00 33.59           C  
ANISOU 1953  CZ2 TRP B1065     3378   4565   4819   -526    712  -1345
ATOM   1954  CZ3 TRP B1065      96.091  71.899 -10.369  1.00 35.33           C  
ANISOU 1954  CZ3 TRP B1065     3561   5098   4764   -639    756  -1521
ATOM   1955  CH2 TRP B1065      95.197  71.278  -9.477  1.00 32.93           C  
ANISOU 1955  CH2 TRP B1065     3239   4603   4668   -597    784  -1493
ATOM   1956  H   TRP B1065     102.853  72.709  -9.482  1.00  0.00           H  
ATOM   1957  HE1 TRP B1065      97.475  69.611  -6.259  1.00  0.00           H  
ATOM   1958  N   SER B1066     102.350  71.484  -6.376  1.00 23.01           N  
ANISOU 1958  N   SER B1066     2377   3469   2893   -366    283   -788
ATOM   1959  CA  SER B1066     102.635  70.986  -5.037  1.00 20.95           C  
ANISOU 1959  CA  SER B1066     2173   3085   2700   -313    239   -682
ATOM   1960  C   SER B1066     103.050  72.112  -4.083  1.00 17.10           C  
ANISOU 1960  C   SER B1066     1734   2607   2155   -286    184   -573
ATOM   1961  O   SER B1066     102.663  72.093  -2.913  1.00 19.42           O  
ANISOU 1961  O   SER B1066     2055   2805   2517   -258    162   -507
ATOM   1962  CB  SER B1066     103.739  69.926  -5.089  1.00 22.48           C  
ANISOU 1962  CB  SER B1066     2396   3261   2883   -295    213   -660
ATOM   1963  OG  SER B1066     103.342  68.812  -5.869  1.00 25.27           O  
ANISOU 1963  OG  SER B1066     2701   3588   3309   -321    269   -761
ATOM   1964  H   SER B1066     102.903  71.106  -7.140  1.00  0.00           H  
ATOM   1965  HG  SER B1066     102.430  68.572  -5.617  1.00  0.00           H  
ATOM   1966  N   PHE B1067     103.785  73.103  -4.604  1.00 19.30           N  
ANISOU 1966  N   PHE B1067     2018   3000   2314   -295    161   -548
ATOM   1967  CA  PHE B1067     104.104  74.307  -3.855  1.00 21.83           C  
ANISOU 1967  CA  PHE B1067     2376   3325   2591   -273    118   -447
ATOM   1968  C   PHE B1067     102.857  75.066  -3.390  1.00 25.79           C  
ANISOU 1968  C   PHE B1067     2859   3793   3146   -283    144   -452
ATOM   1969  O   PHE B1067     102.810  75.497  -2.242  1.00 23.50           O  
ANISOU 1969  O   PHE B1067     2602   3436   2891   -258    111   -374
ATOM   1970  CB  PHE B1067     105.057  75.235  -4.620  1.00 20.16           C  
ANISOU 1970  CB  PHE B1067     2161   3243   2254   -282     96   -410
ATOM   1971  CG  PHE B1067     105.232  76.579  -3.945  1.00 24.50           C  
ANISOU 1971  CG  PHE B1067     2736   3795   2777   -267     69   -315
ATOM   1972  CD1 PHE B1067     106.010  76.670  -2.777  1.00 22.80           C  
ANISOU 1972  CD1 PHE B1067     2573   3500   2586   -227     23   -223
ATOM   1973  CD2 PHE B1067     104.436  77.675  -4.330  1.00 25.96           C  
ANISOU 1973  CD2 PHE B1067     2889   4049   2925   -299     98   -326
ATOM   1974  CE1 PHE B1067     106.057  77.860  -2.070  1.00 22.66           C  
ANISOU 1974  CE1 PHE B1067     2575   3471   2563   -216      4   -144
ATOM   1975  CE2 PHE B1067     104.494  78.858  -3.610  1.00 23.17           C  
ANISOU 1975  CE2 PHE B1067     2555   3685   2560   -286     79   -236
ATOM   1976  CZ  PHE B1067     105.304  78.949  -2.486  1.00 26.77           C  
ANISOU 1976  CZ  PHE B1067     3062   4056   3050   -245     31   -146
ATOM   1977  H   PHE B1067     104.093  73.053  -5.574  1.00  0.00           H  
ATOM   1978  N   GLY B1068     101.867  75.206  -4.278  1.00 27.47           N  
ANISOU 1978  N   GLY B1068     3013   4054   3367   -325    205   -549
ATOM   1979  CA  GLY B1068     100.625  75.902  -3.967  1.00 23.59           C  
ANISOU 1979  CA  GLY B1068     2491   3532   2937   -338    241   -567
ATOM   1980  C   GLY B1068      99.911  75.228  -2.791  1.00 19.34           C  
ANISOU 1980  C   GLY B1068     1960   2845   2540   -306    232   -536
ATOM   1981  O   GLY B1068      99.409  75.906  -1.897  1.00 20.64           O  
ANISOU 1981  O   GLY B1068     2130   2963   2748   -294    217   -483
ATOM   1982  H   GLY B1068     101.985  74.821  -5.212  1.00  0.00           H  
ATOM   1983  N   VAL B1069      99.909  73.890  -2.760  1.00 20.96           N  
ANISOU 1983  N   VAL B1069     2162   2980   2819   -295    239   -565
ATOM   1984  CA  VAL B1069      99.349  73.127  -1.649  1.00 21.31           C  
ANISOU 1984  CA  VAL B1069     2212   2891   2994   -264    223   -517
ATOM   1985  C   VAL B1069     100.198  73.267  -0.369  1.00 21.61           C  
ANISOU 1985  C   VAL B1069     2319   2895   2995   -228    142   -397
ATOM   1986  O   VAL B1069      99.639  73.418   0.716  1.00 21.05           O  
ANISOU 1986  O   VAL B1069     2252   2752   2993   -211    115   -338
ATOM   1987  CB  VAL B1069      99.175  71.631  -2.002  1.00 24.66           C  
ANISOU 1987  CB  VAL B1069     2613   3249   3507   -263    255   -567
ATOM   1988  CG1 VAL B1069      98.519  70.845  -0.862  1.00 23.41           C  
ANISOU 1988  CG1 VAL B1069     2452   2960   3480   -232    236   -498
ATOM   1989  CG2 VAL B1069      98.340  71.459  -3.278  1.00 22.86           C  
ANISOU 1989  CG2 VAL B1069     2309   3049   3325   -306    344   -706
ATOM   1990  H   VAL B1069     100.348  73.373  -3.513  1.00  0.00           H  
ATOM   1991  N   THR B1070     101.527  73.264  -0.507  1.00 17.44           N  
ANISOU 1991  N   THR B1070     1840   2420   2364   -220    107   -366
ATOM   1992  CA  THR B1070     102.437  73.531   0.600  1.00 17.35           C  
ANISOU 1992  CA  THR B1070     1893   2387   2312   -193     42   -272
ATOM   1993  C   THR B1070     102.230  74.947   1.187  1.00 18.85           C  
ANISOU 1993  C   THR B1070     2087   2590   2484   -195     23   -226
ATOM   1994  O   THR B1070     102.255  75.116   2.406  1.00 16.13           O  
ANISOU 1994  O   THR B1070     1771   2189   2166   -180    -19   -163
ATOM   1995  CB  THR B1070     103.917  73.379   0.172  1.00 19.10           C  
ANISOU 1995  CB  THR B1070     2151   2663   2440   -185     22   -259
ATOM   1996  OG1 THR B1070     104.165  72.047  -0.237  1.00 21.50           O  
ANISOU 1996  OG1 THR B1070     2453   2943   2770   -183     38   -296
ATOM   1997  CG2 THR B1070     104.925  73.728   1.278  1.00 16.71           C  
ANISOU 1997  CG2 THR B1070     1910   2334   2104   -161    -32   -174
ATOM   1998  H   THR B1070     101.938  73.121  -1.424  1.00  0.00           H  
ATOM   1999  HG1 THR B1070     103.692  71.867  -1.063  1.00  0.00           H  
ATOM   2000  N   LEU B1071     101.996  75.942   0.325  1.00 15.45           N  
ANISOU 2000  N   LEU B1071     1624   2240   2004   -218     56   -258
ATOM   2001  CA  LEU B1071     101.657  77.301   0.727  1.00 20.86           C  
ANISOU 2001  CA  LEU B1071     2306   2940   2680   -225     51   -217
ATOM   2002  C   LEU B1071     100.368  77.337   1.556  1.00 22.79           C  
ANISOU 2002  C   LEU B1071     2520   3103   3035   -224     57   -217
ATOM   2003  O   LEU B1071     100.310  78.033   2.566  1.00 20.68           O  
ANISOU 2003  O   LEU B1071     2266   2801   2788   -217     24   -158
ATOM   2004  CB  LEU B1071     101.536  78.191  -0.521  1.00 22.77           C  
ANISOU 2004  CB  LEU B1071     2510   3294   2848   -257     96   -257
ATOM   2005  CG  LEU B1071     101.218  79.675  -0.274  1.00 24.86           C  
ANISOU 2005  CG  LEU B1071     2764   3592   3090   -271    103   -215
ATOM   2006  CD1 LEU B1071     102.254  80.347   0.626  1.00 22.69           C  
ANISOU 2006  CD1 LEU B1071     2541   3293   2787   -246     48   -113
ATOM   2007  CD2 LEU B1071     101.123  80.382  -1.623  1.00 25.84           C  
ANISOU 2007  CD2 LEU B1071     2850   3849   3116   -309    151   -257
ATOM   2008  H   LEU B1071     102.056  75.757  -0.679  1.00  0.00           H  
ATOM   2009  N   HIS B1072      99.375  76.541   1.151  1.00 19.83           N  
ANISOU 2009  N   HIS B1072     2096   2693   2742   -232    100   -283
ATOM   2010  CA  HIS B1072      98.144  76.371   1.906  1.00 20.30           C  
ANISOU 2010  CA  HIS B1072     2115   2670   2927   -227    107   -278
ATOM   2011  C   HIS B1072      98.415  75.789   3.309  1.00 18.88           C  
ANISOU 2011  C   HIS B1072     1974   2412   2786   -198     35   -191
ATOM   2012  O   HIS B1072      97.931  76.352   4.289  1.00 19.90           O  
ANISOU 2012  O   HIS B1072     2091   2500   2968   -194      5   -144
ATOM   2013  CB  HIS B1072      97.168  75.489   1.123  1.00 21.85           C  
ANISOU 2013  CB  HIS B1072     2249   2830   3223   -237    173   -363
ATOM   2014  CG  HIS B1072      95.761  75.602   1.621  1.00 23.67           C  
ANISOU 2014  CG  HIS B1072     2414   2983   3594   -235    199   -368
ATOM   2015  ND1 HIS B1072      95.318  74.962   2.778  1.00 24.38           N  
ANISOU 2015  ND1 HIS B1072     2498   2978   3785   -207    153   -296
ATOM   2016  CD2 HIS B1072      94.719  76.315   1.087  1.00 26.76           C  
ANISOU 2016  CD2 HIS B1072     2736   3384   4044   -260    270   -438
ATOM   2017  CE1 HIS B1072      94.049  75.316   2.915  1.00 28.19           C  
ANISOU 2017  CE1 HIS B1072     2907   3406   4396   -209    189   -312
ATOM   2018  NE2 HIS B1072      93.640  76.121   1.930  1.00 30.08           N  
ANISOU 2018  NE2 HIS B1072     3109   3706   4613   -241    264   -404
ATOM   2019  H   HIS B1072      99.498  75.979   0.316  1.00  0.00           H  
ATOM   2020  HE2 HIS B1072      92.724  76.549   1.791  1.00  0.00           H  
ATOM   2021  N   GLU B1073      99.230  74.718   3.396  1.00 15.46           N  
ANISOU 2021  N   GLU B1073     1584   1967   2322   -184      7   -173
ATOM   2022  CA  GLU B1073      99.702  74.137   4.662  1.00 19.88           C  
ANISOU 2022  CA  GLU B1073     2185   2473   2892   -165    -59    -95
ATOM   2023  C   GLU B1073     100.367  75.181   5.576  1.00 18.63           C  
ANISOU 2023  C   GLU B1073     2073   2335   2669   -167   -109    -42
ATOM   2024  O   GLU B1073     100.011  75.261   6.751  1.00 19.40           O  
ANISOU 2024  O   GLU B1073     2175   2394   2799   -165   -157      9
ATOM   2025  CB  GLU B1073     100.675  72.951   4.464  1.00 17.88           C  
ANISOU 2025  CB  GLU B1073     1975   2220   2598   -156    -67    -93
ATOM   2026  CG  GLU B1073     100.073  71.690   3.828  1.00 15.50           C  
ANISOU 2026  CG  GLU B1073     1635   1883   2370   -154    -22   -136
ATOM   2027  CD  GLU B1073     101.030  70.501   3.898  1.00 19.43           C  
ANISOU 2027  CD  GLU B1073     2181   2380   2820   -146    -36   -122
ATOM   2028  OE1 GLU B1073     101.855  70.330   2.974  1.00 18.56           O  
ANISOU 2028  OE1 GLU B1073     2082   2324   2646   -152     -9   -173
ATOM   2029  OE2 GLU B1073     100.928  69.745   4.887  1.00 22.89           O1-
ANISOU 2029  OE2 GLU B1073     2645   2773   3276   -135    -77    -55
ATOM   2030  H   GLU B1073      99.577  74.302   2.536  1.00  0.00           H  
ATOM   2031  N   LEU B1074     101.271  75.988   5.007  1.00 17.34           N  
ANISOU 2031  N   LEU B1074     1936   2233   2417   -172    -97    -54
ATOM   2032  CA  LEU B1074     101.993  77.056   5.692  1.00 16.37           C  
ANISOU 2032  CA  LEU B1074     1852   2121   2245   -173   -133     -8
ATOM   2033  C   LEU B1074     101.036  78.111   6.265  1.00 19.85           C  
ANISOU 2033  C   LEU B1074     2255   2544   2741   -186   -135      7
ATOM   2034  O   LEU B1074     101.178  78.512   7.421  1.00 17.27           O  
ANISOU 2034  O   LEU B1074     1946   2186   2427   -189   -179     49
ATOM   2035  CB  LEU B1074     103.026  77.661   4.716  1.00 21.36           C  
ANISOU 2035  CB  LEU B1074     2501   2823   2793   -174   -110    -15
ATOM   2036  CG  LEU B1074     103.704  78.977   5.136  1.00 26.18           C  
ANISOU 2036  CG  LEU B1074     3131   3446   3369   -177   -124     31
ATOM   2037  CD1 LEU B1074     104.512  78.821   6.424  1.00 22.48           C  
ANISOU 2037  CD1 LEU B1074     2713   2924   2903   -169   -173     67
ATOM   2038  CD2 LEU B1074     104.609  79.452   4.006  1.00 25.23           C  
ANISOU 2038  CD2 LEU B1074     3012   3401   3172   -175   -100     36
ATOM   2039  H   LEU B1074     101.465  75.872   4.015  1.00  0.00           H  
ATOM   2040  N   LEU B1075     100.051  78.518   5.459  1.00 24.16           N  
ANISOU 2040  N   LEU B1075     2744   3111   3323   -197    -83    -33
ATOM   2041  CA  LEU B1075      99.090  79.549   5.836  1.00 25.67           C  
ANISOU 2041  CA  LEU B1075     2893   3290   3571   -211    -73    -24
ATOM   2042  C   LEU B1075      98.092  79.078   6.898  1.00 31.28           C  
ANISOU 2042  C   LEU B1075     3570   3925   4389   -205   -107      0
ATOM   2043  O   LEU B1075      97.580  79.907   7.649  1.00 25.02           O  
ANISOU 2043  O   LEU B1075     2751   3112   3644   -214   -123     24
ATOM   2044  CB  LEU B1075      98.367  80.085   4.592  1.00 26.98           C  
ANISOU 2044  CB  LEU B1075     3004   3508   3737   -231      3    -85
ATOM   2045  CG  LEU B1075      99.282  80.901   3.659  1.00 24.93           C  
ANISOU 2045  CG  LEU B1075     2765   3341   3363   -244     29    -87
ATOM   2046  CD1 LEU B1075      98.609  81.169   2.325  1.00 30.45           C  
ANISOU 2046  CD1 LEU B1075     3413   4116   4040   -272    105   -161
ATOM   2047  CD2 LEU B1075      99.711  82.221   4.290  1.00 22.30           C  
ANISOU 2047  CD2 LEU B1075     2452   3013   3008   -250      7    -22
ATOM   2048  H   LEU B1075      99.969  78.121   4.526  1.00  0.00           H  
ATOM   2049  N   THR B1076      97.850  77.767   6.974  1.00 20.58           N  
ANISOU 2049  N   THR B1076     2210   2532   3076   -190   -118     -3
ATOM   2050  CA  THR B1076      97.008  77.170   8.008  1.00 21.50           C  
ANISOU 2050  CA  THR B1076     2295   2584   3289   -180   -162     42
ATOM   2051  C   THR B1076      97.835  76.668   9.203  1.00 19.82           C  
ANISOU 2051  C   THR B1076     2141   2363   3024   -178   -242    104
ATOM   2052  O   THR B1076      97.282  76.015  10.093  1.00 21.14           O  
ANISOU 2052  O   THR B1076     2289   2493   3247   -173   -292    154
ATOM   2053  CB  THR B1076      96.136  76.029   7.429  1.00 22.67           C  
ANISOU 2053  CB  THR B1076     2388   2686   3537   -167   -122     16
ATOM   2054  OG1 THR B1076      96.888  74.892   7.033  1.00 29.33           O  
ANISOU 2054  OG1 THR B1076     3274   3534   4334   -158   -121     10
ATOM   2055  CG2 THR B1076      95.301  76.527   6.248  1.00 25.05           C  
ANISOU 2055  CG2 THR B1076     2630   3003   3884   -180    -33    -66
ATOM   2056  H   THR B1076      98.269  77.144   6.292  1.00  0.00           H  
ATOM   2057  HG1 THR B1076      97.478  75.160   6.317  1.00  0.00           H  
ATOM   2058  N   TYR B1077      99.138  76.995   9.229  1.00 21.87           N  
ANISOU 2058  N   TYR B1077     2468   2661   3180   -183   -254    100
ATOM   2059  CA  TYR B1077     100.077  76.632  10.285  1.00 20.06           C  
ANISOU 2059  CA  TYR B1077     2298   2432   2890   -188   -315    137
ATOM   2060  C   TYR B1077     100.170  75.118  10.480  1.00 24.27           C  
ANISOU 2060  C   TYR B1077     2847   2949   3426   -177   -335    159
ATOM   2061  O   TYR B1077     100.371  74.656  11.603  1.00 20.21           O  
ANISOU 2061  O   TYR B1077     2354   2430   2894   -186   -394    204
ATOM   2062  CB  TYR B1077      99.704  77.338  11.594  1.00 23.69           C  
ANISOU 2062  CB  TYR B1077     2744   2877   3379   -207   -371    173
ATOM   2063  CG  TYR B1077      99.870  78.834  11.543  1.00 18.98           C  
ANISOU 2063  CG  TYR B1077     2142   2291   2777   -222   -352    159
ATOM   2064  CD1 TYR B1077     101.129  79.397  11.815  1.00 22.00           C  
ANISOU 2064  CD1 TYR B1077     2579   2688   3092   -232   -358    154
ATOM   2065  CD2 TYR B1077      98.781  79.665  11.222  1.00 22.54           C  
ANISOU 2065  CD2 TYR B1077     2529   2734   3300   -225   -320    151
ATOM   2066  CE1 TYR B1077     101.294  80.788  11.790  1.00 21.74           C  
ANISOU 2066  CE1 TYR B1077     2537   2656   3065   -245   -337    153
ATOM   2067  CE2 TYR B1077      98.950  81.059  11.189  1.00 23.66           C  
ANISOU 2067  CE2 TYR B1077     2665   2887   3437   -241   -299    146
ATOM   2068  CZ  TYR B1077     100.204  81.620  11.487  1.00 28.53           C  
ANISOU 2068  CZ  TYR B1077     3337   3514   3989   -250   -309    153
ATOM   2069  OH  TYR B1077     100.374  82.969  11.484  1.00 27.65           O  
ANISOU 2069  OH  TYR B1077     3217   3405   3883   -266   -284    160
ATOM   2070  H   TYR B1077      99.531  77.534   8.465  1.00  0.00           H  
ATOM   2071  HH  TYR B1077     101.281  83.198  11.766  1.00  0.00           H  
ATOM   2072  N   CYS B1078      99.979  74.365   9.391  1.00 19.73           N  
ANISOU 2072  N   CYS B1078     2255   2370   2872   -162   -283    127
ATOM   2073  CA  CYS B1078     100.052  72.912   9.369  1.00 20.95           C  
ANISOU 2073  CA  CYS B1078     2417   2502   3038   -152   -288    148
ATOM   2074  C   CYS B1078      99.089  72.246  10.370  1.00 25.37           C  
ANISOU 2074  C   CYS B1078     2942   3023   3672   -150   -338    220
ATOM   2075  O   CYS B1078      99.394  71.166  10.892  1.00 23.69           O  
ANISOU 2075  O   CYS B1078     2756   2807   3436   -149   -370    268
ATOM   2076  CB  CYS B1078     101.498  72.446   9.618  1.00 22.17           C  
ANISOU 2076  CB  CYS B1078     2649   2686   3085   -156   -307    151
ATOM   2077  SG  CYS B1078     102.506  72.728   8.138  1.00 23.12           S  
ANISOU 2077  SG  CYS B1078     2795   2847   3141   -149   -246     82
ATOM   2078  H   CYS B1078      99.830  74.821   8.489  1.00  0.00           H  
ATOM   2079  HG  CYS B1078     103.716  72.815   8.706  1.00  0.00           H  
ATOM   2080  N   ASP B1079      97.939  72.875  10.649  1.00 23.68           N  
ANISOU 2080  N   ASP B1079     2663   2783   3551   -149   -343    234
ATOM   2081  CA  ASP B1079      96.969  72.254  11.544  1.00 28.87           C  
ANISOU 2081  CA  ASP B1079     3273   3404   4292   -143   -394    316
ATOM   2082  C   ASP B1079      96.342  71.044  10.838  1.00 27.32           C  
ANISOU 2082  C   ASP B1079     3032   3153   4195   -121   -350    328
ATOM   2083  O   ASP B1079      95.951  71.149   9.673  1.00 26.24           O  
ANISOU 2083  O   ASP B1079     2857   2989   4121   -113   -272    258
ATOM   2084  CB  ASP B1079      95.894  73.211  12.061  1.00 28.24           C  
ANISOU 2084  CB  ASP B1079     3124   3304   4300   -147   -415    335
ATOM   2085  CG  ASP B1079      94.998  72.520  13.083  1.00 38.45           C  
ANISOU 2085  CG  ASP B1079     4365   4569   5676   -140   -480    435
ATOM   2086  OD1 ASP B1079      95.414  72.421  14.254  1.00 39.18           O  
ANISOU 2086  OD1 ASP B1079     4490   4702   5693   -159   -562    493
ATOM   2087  OD2 ASP B1079      93.924  72.041  12.673  1.00 35.39           O1-
ANISOU 2087  OD2 ASP B1079     3900   4119   5426   -117   -447    455
ATOM   2088  H   ASP B1079      97.711  73.763  10.212  1.00  0.00           H  
ATOM   2089  N   SER B1080      96.286  69.914  11.544  1.00 26.19           N  
ANISOU 2089  N   SER B1080     2891   2996   4063   -116   -397    415
ATOM   2090  CA  SER B1080      95.815  68.648  10.990  1.00 31.70           C  
ANISOU 2090  CA  SER B1080     3554   3636   4854    -96   -354    438
ATOM   2091  C   SER B1080      94.379  68.700  10.459  1.00 34.55           C  
ANISOU 2091  C   SER B1080     3809   3917   5399    -76   -304    430
ATOM   2092  O   SER B1080      94.090  68.094   9.425  1.00 30.53           O  
ANISOU 2092  O   SER B1080     3264   3354   4978    -65   -227    384
ATOM   2093  CB  SER B1080      95.985  67.530  12.029  1.00 39.62           C  
ANISOU 2093  CB  SER B1080     4574   4646   5832    -98   -420    556
ATOM   2094  OG  SER B1080      95.400  67.883  13.274  1.00 45.67           O  
ANISOU 2094  OG  SER B1080     5308   5429   6615   -104   -505    644
ATOM   2095  H   SER B1080      96.493  69.923  12.536  1.00  0.00           H  
ATOM   2096  HG  SER B1080      95.476  67.129  13.873  1.00  0.00           H  
ATOM   2097  N   ASP B1081      93.518  69.467  11.128  1.00 36.87           N  
ANISOU 2097  N   ASP B1081     4047   4200   5760    -75   -341    466
ATOM   2098  CA  ASP B1081      92.116  69.600  10.752  1.00 33.56           C  
ANISOU 2098  CA  ASP B1081     3518   3698   5532    -55   -292    461
ATOM   2099  C   ASP B1081      91.902  70.536   9.558  1.00 34.39           C  
ANISOU 2099  C   ASP B1081     3602   3802   5660    -64   -198    325
ATOM   2100  O   ASP B1081      90.791  70.586   9.031  1.00 36.16           O  
ANISOU 2100  O   ASP B1081     3736   3959   6042    -53   -134    289
ATOM   2101  CB  ASP B1081      91.221  69.982  11.942  1.00 36.89           C  
ANISOU 2101  CB  ASP B1081     3877   4109   6031    -50   -368    558
ATOM   2102  CG  ASP B1081      91.106  68.864  12.974  1.00 38.01           C  
ANISOU 2102  CG  ASP B1081     4006   4242   6192    -39   -451    707
ATOM   2103  OD1 ASP B1081      90.533  67.811  12.630  1.00 50.10           O  
ANISOU 2103  OD1 ASP B1081     5483   5697   7853    -14   -416    756
ATOM   2104  OD2 ASP B1081      91.503  69.065  14.139  1.00 47.51           O1-
ANISOU 2104  OD2 ASP B1081     5251   5517   7282    -59   -548    774
ATOM   2105  H   ASP B1081      93.837  70.036  11.913  1.00  0.00           H  
ATOM   2106  N   SER B1082      92.957  71.234   9.125  1.00 29.33           N  
ANISOU 2106  N   SER B1082     3041   3238   4864    -85   -187    251
ATOM   2107  CA  SER B1082      92.956  72.034   7.904  1.00 32.53           C  
ANISOU 2107  CA  SER B1082     3436   3668   5256   -100   -100    127
ATOM   2108  C   SER B1082      93.895  71.448   6.838  1.00 30.15           C  
ANISOU 2108  C   SER B1082     3185   3399   4868   -108    -50     54
ATOM   2109  O   SER B1082      94.137  72.116   5.833  1.00 32.14           O  
ANISOU 2109  O   SER B1082     3443   3700   5069   -126      9    -42
ATOM   2110  CB  SER B1082      93.401  73.464   8.242  1.00 41.89           C  
ANISOU 2110  CB  SER B1082     4657   4921   6338   -120   -126    109
ATOM   2111  OG  SER B1082      92.504  74.068   9.160  1.00 43.59           O  
ANISOU 2111  OG  SER B1082     4816   5108   6635   -117   -166    163
ATOM   2112  H   SER B1082      93.843  71.154   9.616  1.00  0.00           H  
ATOM   2113  HG  SER B1082      92.517  73.535   9.967  1.00  0.00           H  
ATOM   2114  N   SER B1083      94.435  70.239   7.064  1.00 29.86           N  
ANISOU 2114  N   SER B1083     3185   3346   4812    -98    -75    103
ATOM   2115  CA  SER B1083      95.360  69.600   6.129  1.00 32.55           C  
ANISOU 2115  CA  SER B1083     3575   3723   5068   -107    -36     39
ATOM   2116  C   SER B1083      94.704  69.389   4.744  1.00 30.87           C  
ANISOU 2116  C   SER B1083     3296   3475   4955   -114     64    -65
ATOM   2117  O   SER B1083      93.491  69.156   4.695  1.00 28.68           O  
ANISOU 2117  O   SER B1083     2935   3118   4841   -105    103    -67
ATOM   2118  CB  SER B1083      95.907  68.288   6.734  1.00 37.81           C  
ANISOU 2118  CB  SER B1083     4288   4374   5703    -96    -76    115
ATOM   2119  OG  SER B1083      94.915  67.288   6.909  1.00 43.19           O  
ANISOU 2119  OG  SER B1083     4909   4970   6531    -83    -38    138
ATOM   2120  H   SER B1083      94.177  69.713   7.886  1.00  0.00           H  
ATOM   2121  HG  SER B1083      94.495  67.446   7.775  1.00  0.00           H  
ATOM   2122  N   PRO B1084      95.497  69.460   3.651  1.00 26.36           N  
ANISOU 2122  N   PRO B1084     2756   2965   4294   -133    109   -157
ATOM   2123  CA  PRO B1084      94.996  69.199   2.292  1.00 31.27           C  
ANISOU 2123  CA  PRO B1084     3318   3575   4985   -153    206   -279
ATOM   2124  C   PRO B1084      94.197  67.896   2.155  1.00 29.05           C  
ANISOU 2124  C   PRO B1084     2975   3182   4879   -140    251   -272
ATOM   2125  O   PRO B1084      93.129  67.919   1.555  1.00 32.52           O  
ANISOU 2125  O   PRO B1084     3332   3568   5455   -150    331   -351
ATOM   2126  CB  PRO B1084      96.265  69.180   1.438  1.00 30.90           C  
ANISOU 2126  CB  PRO B1084     3330   3620   4790   -171    213   -338
ATOM   2127  CG  PRO B1084      97.213  70.102   2.168  1.00 36.30           C  
ANISOU 2127  CG  PRO B1084     4087   4376   5330   -166    138   -275
ATOM   2128  CD  PRO B1084      96.912  69.823   3.625  1.00 29.07           C  
ANISOU 2128  CD  PRO B1084     3186   3398   4461   -141     69   -155
ATOM   2129  N   MET B1085      94.684  66.811   2.779  1.00 32.77           N  
ANISOU 2129  N   MET B1085     3480   3614   5354   -120    205   -174
ATOM   2130  CA  MET B1085      93.981  65.535   2.894  1.00 31.03           C  
ANISOU 2130  CA  MET B1085     3199   3278   5310   -104    242   -136
ATOM   2131  C   MET B1085      92.611  65.671   3.588  1.00 37.00           C  
ANISOU 2131  C   MET B1085     3875   3945   6237    -81    237    -67
ATOM   2132  O   MET B1085      91.611  65.278   2.991  1.00 39.24           O  
ANISOU 2132  O   MET B1085     4068   4136   6706    -79    316   -115
ATOM   2133  CB  MET B1085      94.900  64.496   3.573  1.00 36.94           C  
ANISOU 2133  CB  MET B1085     4007   4019   6007    -90    186    -26
ATOM   2134  CG  MET B1085      94.256  63.113   3.783  1.00 44.22           C  
ANISOU 2134  CG  MET B1085     4868   4825   7106    -77    234     15
ATOM   2135  SD  MET B1085      95.394  61.832   4.382  1.00 54.00           S  
ANISOU 2135  SD  MET B1085     6180   6072   8264    -73    194    116
ATOM   2136  CE  MET B1085      95.659  62.405   6.084  1.00 56.22           C  
ANISOU 2136  CE  MET B1085     6489   6365   8504    -50     76    305
ATOM   2137  H   MET B1085      95.574  66.875   3.250  1.00  0.00           H  
ATOM   2138  N   ALA B1086      92.572  66.248   4.804  1.00 35.10           N  
ANISOU 2138  N   ALA B1086     3661   3731   5944    -66    145     43
ATOM   2139  CA  ALA B1086      91.331  66.472   5.559  1.00 35.79           C  
ANISOU 2139  CA  ALA B1086     3667   3744   6186    -44    126    120
ATOM   2140  C   ALA B1086      90.283  67.272   4.773  1.00 37.88           C  
ANISOU 2140  C   ALA B1086     3848   3975   6569    -54    215      3
ATOM   2141  O   ALA B1086      89.116  66.882   4.746  1.00 38.65           O  
ANISOU 2141  O   ALA B1086     3844   3964   6877    -37    265     14
ATOM   2142  CB  ALA B1086      91.614  67.185   6.889  1.00 32.39           C  
ANISOU 2142  CB  ALA B1086     3280   3373   5650    -39     15    224
ATOM   2143  H   ALA B1086      93.428  66.577   5.236  1.00  0.00           H  
ATOM   2144  N   LEU B1087      90.726  68.357   4.131  1.00 30.54           N  
ANISOU 2144  N   LEU B1087     2955   3138   5511    -83    240   -106
ATOM   2145  CA  LEU B1087      89.853  69.236   3.361  1.00 31.96           C  
ANISOU 2145  CA  LEU B1087     3063   3312   5768   -103    326   -226
ATOM   2146  C   LEU B1087      89.362  68.599   2.062  1.00 37.18           C  
ANISOU 2146  C   LEU B1087     3660   3919   6547   -122    447   -358
ATOM   2147  O   LEU B1087      88.183  68.735   1.736  1.00 33.71           O  
ANISOU 2147  O   LEU B1087     3123   3406   6279   -125    528   -423
ATOM   2148  CB  LEU B1087      90.556  70.564   3.045  1.00 28.79           C  
ANISOU 2148  CB  LEU B1087     2721   3039   5179   -133    317   -292
ATOM   2149  CG  LEU B1087      90.896  71.418   4.277  1.00 34.23           C  
ANISOU 2149  CG  LEU B1087     3459   3773   5772   -122    214   -186
ATOM   2150  CD1 LEU B1087      91.571  72.722   3.847  1.00 33.64           C  
ANISOU 2150  CD1 LEU B1087     3435   3814   5531   -152    219   -249
ATOM   2151  CD2 LEU B1087      89.671  71.718   5.147  1.00 38.01           C  
ANISOU 2151  CD2 LEU B1087     3855   4175   6410   -102    198   -119
ATOM   2152  H   LEU B1087      91.714  68.595   4.186  1.00  0.00           H  
ATOM   2153  N   PHE B1088      90.251  67.909   1.343  1.00 40.22           N  
ANISOU 2153  N   PHE B1088     4094   4341   6844   -139    465   -410
ATOM   2154  CA  PHE B1088      89.872  67.221   0.115  1.00 36.29           C  
ANISOU 2154  CA  PHE B1088     3535   3798   6455   -165    580   -548
ATOM   2155  C   PHE B1088      88.895  66.075   0.362  1.00 35.58           C  
ANISOU 2155  C   PHE B1088     3357   3543   6617   -136    621   -494
ATOM   2156  O   PHE B1088      87.897  65.981  -0.347  1.00 40.88           O  
ANISOU 2156  O   PHE B1088     3932   4133   7466   -150    729   -601
ATOM   2157  CB  PHE B1088      91.088  66.736  -0.685  1.00 36.60           C  
ANISOU 2157  CB  PHE B1088     3642   3917   6345   -191    582   -609
ATOM   2158  CG  PHE B1088      91.605  67.741  -1.694  1.00 36.98           C  
ANISOU 2158  CG  PHE B1088     3717   4105   6227   -237    612   -742
ATOM   2159  CD1 PHE B1088      90.750  68.245  -2.696  1.00 41.02           C  
ANISOU 2159  CD1 PHE B1088     4154   4629   6801   -278    716   -897
ATOM   2160  CD2 PHE B1088      92.948  68.156  -1.667  1.00 33.29           C  
ANISOU 2160  CD2 PHE B1088     3345   3761   5542   -243    541   -712
ATOM   2161  CE1 PHE B1088      91.232  69.159  -3.623  1.00 35.57           C  
ANISOU 2161  CE1 PHE B1088     3485   4085   5941   -327    740  -1009
ATOM   2162  CE2 PHE B1088      93.415  69.062  -2.606  1.00 32.28           C  
ANISOU 2162  CE2 PHE B1088     3235   3767   5263   -284    563   -814
ATOM   2163  CZ  PHE B1088      92.560  69.563  -3.580  1.00 31.78           C  
ANISOU 2163  CZ  PHE B1088     3099   3729   5245   -328    659   -958
ATOM   2164  H   PHE B1088      91.223  67.847   1.640  1.00  0.00           H  
ATOM   2165  N   LEU B1089      89.141  65.268   1.401  1.00 35.00           N  
ANISOU 2165  N   LEU B1089     3313   3420   6565    -97    538   -326
ATOM   2166  CA  LEU B1089      88.228  64.188   1.780  1.00 42.76           C  
ANISOU 2166  CA  LEU B1089     4210   4247   7788    -64    566   -238
ATOM   2167  C   LEU B1089      86.863  64.717   2.244  1.00 49.69           C  
ANISOU 2167  C   LEU B1089     4985   5039   8856    -41    587   -210
ATOM   2168  O   LEU B1089      85.862  64.021   2.099  1.00 49.69           O  
ANISOU 2168  O   LEU B1089     4880   4896   9104    -22    656   -197
ATOM   2169  CB  LEU B1089      88.851  63.299   2.867  1.00 37.09           C  
ANISOU 2169  CB  LEU B1089     3549   3520   7021    -32    464    -49
ATOM   2170  CG  LEU B1089      90.078  62.487   2.414  1.00 39.97           C  
ANISOU 2170  CG  LEU B1089     3996   3936   7255    -50    460    -67
ATOM   2171  CD1 LEU B1089      90.722  61.801   3.620  1.00 40.81           C  
ANISOU 2171  CD1 LEU B1089     4166   4058   7279    -24    352    120
ATOM   2172  CD2 LEU B1089      89.743  61.462   1.326  1.00 37.39           C  
ANISOU 2172  CD2 LEU B1089     3602   3508   7094    -64    577   -163
ATOM   2173  H   LEU B1089      89.974  65.406   1.969  1.00  0.00           H  
ATOM   2174  N   LYS B1090      86.828  65.955   2.746  1.00 44.11           N  
ANISOU 2174  N   LYS B1090     4301   4413   8044    -44    534   -201
ATOM   2175  CA  LYS B1090      85.590  66.663   3.031  1.00 48.69           C  
ANISOU 2175  CA  LYS B1090     4782   4929   8787    -30    563   -201
ATOM   2176  C   LYS B1090      84.837  67.031   1.744  1.00 49.75           C  
ANISOU 2176  C   LYS B1090     4838   5032   9030    -66    711   -405
ATOM   2177  O   LYS B1090      83.620  66.856   1.685  1.00 49.11           O  
ANISOU 2177  O   LYS B1090     4638   4826   9194    -52    789   -427
ATOM   2178  CB  LYS B1090      85.889  67.941   3.833  1.00 66.13           C  
ANISOU 2178  CB  LYS B1090     7043   7244  10837    -32    472   -152
ATOM   2179  CG  LYS B1090      84.770  68.318   4.803  1.00 74.78           C  
ANISOU 2179  CG  LYS B1090     8049   8268  12094      0    437    -51
ATOM   2180  CD  LYS B1090      84.747  67.394   6.024  1.00 95.09           C  
ANISOU 2180  CD  LYS B1090    10617  10789  14722     42    330    155
ATOM   2181  CE  LYS B1090      83.691  67.830   7.043  1.00108.80           C  
ANISOU 2181  CE  LYS B1090    12261  12471  16605     72    279    267
ATOM   2182  NZ  LYS B1090      83.651  66.929   8.205  1.00106.02           N1+
ANISOU 2182  NZ  LYS B1090    11896  12085  16300    110    168    478
ATOM   2183  H   LYS B1090      87.697  66.455   2.890  1.00  0.00           H  
ATOM   2184  HZ1 LYS B1090      82.951  67.244   8.853  1.00  0.00           H  
ATOM   2185  HZ2 LYS B1090      83.421  65.993   7.920  1.00  0.00           H  
ATOM   2186  HZ3 LYS B1090      84.538  66.918   8.676  1.00  0.00           H  
ATOM   2187  N   MET B1091      85.570  67.537   0.742  1.00 42.69           N  
ANISOU 2187  N   MET B1091     4007   4257   7954   -116    751   -553
ATOM   2188  CA  MET B1091      85.014  67.884  -0.565  1.00 53.14           C  
ANISOU 2188  CA  MET B1091     5265   5584   9340   -164    892   -763
ATOM   2189  C   MET B1091      84.409  66.670  -1.282  1.00 53.77           C  
ANISOU 2189  C   MET B1091     5258   5526   9643   -168   1002   -840
ATOM   2190  O   MET B1091      83.274  66.753  -1.751  1.00 51.83           O  
ANISOU 2190  O   MET B1091     4901   5182   9608   -178   1115   -940
ATOM   2191  CB  MET B1091      86.076  68.541  -1.470  1.00 44.21           C  
ANISOU 2191  CB  MET B1091     4222   4627   7949   -219    899   -887
ATOM   2192  CG  MET B1091      86.246  70.037  -1.230  1.00 62.83           C  
ANISOU 2192  CG  MET B1091     6621   7110  10140   -236    861   -893
ATOM   2193  SD  MET B1091      87.679  70.722  -2.093  1.00 68.08           S  
ANISOU 2193  SD  MET B1091     7398   7982  10485   -287    833   -971
ATOM   2194  CE  MET B1091      87.526  72.418  -1.504  1.00 82.46           C  
ANISOU 2194  CE  MET B1091     9238   9896  12194   -294    795   -935
ATOM   2195  H   MET B1091      86.568  67.670   0.878  1.00  0.00           H  
ATOM   2196  N   ILE B1092      85.177  65.581  -1.371  1.00 45.69           N  
ANISOU 2196  N   ILE B1092     4285   4490   8585   -162    975   -797
ATOM   2197  CA  ILE B1092      84.854  64.480  -2.279  1.00 56.04           C  
ANISOU 2197  CA  ILE B1092     5525   5689  10077   -179   1087   -895
ATOM   2198  C   ILE B1092      84.209  63.283  -1.570  1.00 52.37           C  
ANISOU 2198  C   ILE B1092     4990   5039   9869   -124   1083   -741
ATOM   2199  O   ILE B1092      83.562  62.488  -2.243  1.00 58.01           O  
ANISOU 2199  O   ILE B1092     5613   5619  10808   -132   1196   -818
ATOM   2200  CB  ILE B1092      86.108  64.004  -3.060  1.00 55.47           C  
ANISOU 2200  CB  ILE B1092     5537   5719   9820   -220   1083   -976
ATOM   2201  CG1 ILE B1092      87.169  63.283  -2.214  1.00 46.39           C  
ANISOU 2201  CG1 ILE B1092     4484   4593   8550   -182    959   -791
ATOM   2202  CG2 ILE B1092      86.733  65.204  -3.771  1.00 42.96           C  
ANISOU 2202  CG2 ILE B1092     4014   4323   7986   -272   1080  -1107
ATOM   2203  CD1 ILE B1092      88.386  62.828  -3.016  1.00 54.60           C  
ANISOU 2203  CD1 ILE B1092     5596   5726   9424   -218    959   -867
ATOM   2204  H   ILE B1092      86.091  65.571  -0.924  1.00  0.00           H  
ATOM   2205  N   GLY B1093      84.357  63.188  -0.247  1.00 56.51           N  
ANISOU 2205  N   GLY B1093     5551   5558  10360    -71    956   -523
ATOM   2206  CA  GLY B1093      83.855  62.071   0.545  1.00 45.68           C  
ANISOU 2206  CA  GLY B1093     4123   4038   9192    -17    928   -338
ATOM   2207  C   GLY B1093      85.024  61.192   1.028  1.00 45.85           C  
ANISOU 2207  C   GLY B1093     4246   4109   9065     -6    836   -205
ATOM   2208  O   GLY B1093      85.914  60.862   0.240  1.00 49.56           O  
ANISOU 2208  O   GLY B1093     4777   4640   9410    -43    865   -307
ATOM   2209  H   GLY B1093      84.870  63.906   0.253  1.00  0.00           H  
ATOM   2210  N   PRO B1094      85.023  60.789   2.319  1.00 50.83           N  
ANISOU 2210  N   PRO B1094     4888   4715   9706     40    725     22
ATOM   2211  CA  PRO B1094      86.118  60.019   2.928  1.00 55.11           C  
ANISOU 2211  CA  PRO B1094     5530   5318  10091     48    629    163
ATOM   2212  C   PRO B1094      86.013  58.490   2.793  1.00 58.27           C  
ANISOU 2212  C   PRO B1094     5884   5587  10666     65    674    253
ATOM   2213  O   PRO B1094      86.865  57.792   3.343  1.00 50.88           O  
ANISOU 2213  O   PRO B1094     5024   4697   9610     71    603    377
ATOM   2214  CB  PRO B1094      86.030  60.433   4.401  1.00 58.86           C  
ANISOU 2214  CB  PRO B1094     6026   5841  10496     83    491    356
ATOM   2215  CG  PRO B1094      84.556  60.675   4.650  1.00 55.75           C  
ANISOU 2215  CG  PRO B1094     5495   5321  10366    114    532    390
ATOM   2216  CD  PRO B1094      84.022  61.166   3.319  1.00 54.73           C  
ANISOU 2216  CD  PRO B1094     5303   5147  10345     83    676    157
ATOM   2217  N   THR B1095      84.973  57.976   2.132  1.00 58.49           N  
ANISOU 2217  N   THR B1095     5787   5453  10980     71    796    188
ATOM   2218  CA  THR B1095      84.617  56.556   2.187  1.00 59.92           C  
ANISOU 2218  CA  THR B1095     5905   5484  11378     95    841    302
ATOM   2219  C   THR B1095      84.550  55.935   0.779  1.00 73.47           C  
ANISOU 2219  C   THR B1095     7571   7109  13233     56    996    107
ATOM   2220  O   THR B1095      83.679  55.106   0.506  1.00 71.68           O  
ANISOU 2220  O   THR B1095     7230   6701  13304     73   1092    128
ATOM   2221  CB  THR B1095      83.257  56.377   2.909  1.00 68.89           C  
ANISOU 2221  CB  THR B1095     6909   6468  12797    149    841    460
ATOM   2222  OG1 THR B1095      82.255  57.209   2.329  1.00 62.16           O  
ANISOU 2222  OG1 THR B1095     5960   5553  12104    142    938    297
ATOM   2223  CG2 THR B1095      83.361  56.725   4.394  1.00 73.93           C  
ANISOU 2223  CG2 THR B1095     7590   7197  13300    184    677    681
ATOM   2224  H   THR B1095      84.316  58.582   1.662  1.00  0.00           H  
ATOM   2225  HG1 THR B1095      82.149  56.938   1.404  1.00  0.00           H  
ATOM   2226  N   HIS B1096      85.469  56.340  -0.102  1.00 51.97           N  
ANISOU 2226  N   HIS B1096     4931   4511  10302      3   1020    -78
ATOM   2227  CA  HIS B1096      85.467  55.884  -1.494  1.00 56.18           C  
ANISOU 2227  CA  HIS B1096     5420   4988  10936    -45   1160   -289
ATOM   2228  C   HIS B1096      86.526  54.841  -1.816  1.00 55.27           C  
ANISOU 2228  C   HIS B1096     5370   4897  10731    -66   1159   -277
ATOM   2229  O   HIS B1096      86.525  54.328  -2.937  1.00 52.21           O  
ANISOU 2229  O   HIS B1096     4942   4460  10432   -109   1271   -444
ATOM   2230  CB  HIS B1096      85.586  57.080  -2.439  1.00 53.21           C  
ANISOU 2230  CB  HIS B1096     5060   4732  10426    -99   1209   -533
ATOM   2231  CG  HIS B1096      84.350  57.924  -2.436  1.00 61.57           C  
ANISOU 2231  CG  HIS B1096     6023   5731  11638    -90   1262   -596
ATOM   2232  ND1 HIS B1096      83.081  57.382  -2.507  1.00 54.41           N  
ANISOU 2232  ND1 HIS B1096     4979   4628  11066    -67   1359   -584
ATOM   2233  CD2 HIS B1096      84.179  59.279  -2.338  1.00 71.42           C  
ANISOU 2233  CD2 HIS B1096     7292   7092  12751   -103   1234   -669
ATOM   2234  CE1 HIS B1096      82.206  58.382  -2.431  1.00 64.94           C  
ANISOU 2234  CE1 HIS B1096     6248   5951  12473    -64   1393   -653
ATOM   2235  NE2 HIS B1096      82.809  59.563  -2.351  1.00 63.56           N  
ANISOU 2235  NE2 HIS B1096     6173   5970  12007    -89   1317   -707
ATOM   2236  H   HIS B1096      86.167  57.017   0.173  1.00  0.00           H  
ATOM   2237  HD1 HIS B1096      82.861  56.394  -2.538  1.00  0.00           H  
ATOM   2238  N   GLY B1097      87.398  54.528  -0.851  1.00 46.57           N  
ANISOU 2238  N   GLY B1097     4364   3871   9457    -40   1037    -86
ATOM   2239  CA  GLY B1097      88.448  53.522  -0.985  1.00 49.88           C  
ANISOU 2239  CA  GLY B1097     4849   4317   9783    -57   1030    -54
ATOM   2240  C   GLY B1097      89.285  53.759  -2.246  1.00 54.88           C  
ANISOU 2240  C   GLY B1097     5524   5048  10281   -117   1087   -285
ATOM   2241  O   GLY B1097      89.822  54.851  -2.451  1.00 50.91           O  
ANISOU 2241  O   GLY B1097     5087   4699   9555   -140   1041   -386
ATOM   2242  H   GLY B1097      87.311  54.987   0.044  1.00  0.00           H  
ATOM   2243  N   GLN B1098      89.337  52.749  -3.117  1.00 50.61           N  
ANISOU 2243  N   GLN B1098     4933   4412   9882   -146   1189   -367
ATOM   2244  CA  GLN B1098      90.118  52.771  -4.354  1.00 47.25           C  
ANISOU 2244  CA  GLN B1098     4534   4075   9340   -208   1243   -579
ATOM   2245  C   GLN B1098      89.597  53.759  -5.415  1.00 40.38           C  
ANISOU 2245  C   GLN B1098     3609   3246   8484   -255   1322   -825
ATOM   2246  O   GLN B1098      90.286  53.976  -6.412  1.00 46.05           O  
ANISOU 2246  O   GLN B1098     4347   4066   9081   -312   1356  -1008
ATOM   2247  CB  GLN B1098      90.180  51.350  -4.933  1.00 63.14           C  
ANISOU 2247  CB  GLN B1098     6494   5961  11534   -229   1340   -601
ATOM   2248  CG  GLN B1098      88.859  50.876  -5.565  1.00 66.81           C  
ANISOU 2248  CG  GLN B1098     6812   6228  12342   -239   1484   -695
ATOM   2249  CD  GLN B1098      88.956  49.460  -6.112  1.00 83.52           C  
ANISOU 2249  CD  GLN B1098     8870   8201  14664   -259   1585   -707
ATOM   2250  OE1 GLN B1098      90.041  48.947  -6.389  1.00 57.71           O  
ANISOU 2250  OE1 GLN B1098     5482   4735  11709   -250   1691   -705
ATOM   2251  NE2 GLN B1098      87.819  48.816  -6.296  1.00 95.11           N  
ANISOU 2251  NE2 GLN B1098    10411   9757  15968   -287   1559   -719
ATOM   2252  H   GLN B1098      88.797  51.914  -2.933  1.00  0.00           H  
ATOM   2253 HE22 GLN B1098      87.823  47.875  -6.660  1.00  0.00           H  
ATOM   2254 HE21 GLN B1098      86.937  49.259  -6.080  1.00  0.00           H  
ATOM   2255  N   MET B1099      88.392  54.306  -5.221  1.00 38.00           N  
ANISOU 2255  N   MET B1099     3232   2868   8335   -236   1356   -833
ATOM   2256  CA  MET B1099      87.823  55.298  -6.128  1.00 38.07           C  
ANISOU 2256  CA  MET B1099     3191   2928   8343   -283   1432  -1061
ATOM   2257  C   MET B1099      88.236  56.721  -5.756  1.00 41.96           C  
ANISOU 2257  C   MET B1099     3768   3603   8569   -279   1328  -1052
ATOM   2258  O   MET B1099      87.953  57.628  -6.538  1.00 43.28           O  
ANISOU 2258  O   MET B1099     3914   3852   8678   -322   1375  -1227
ATOM   2259  CB  MET B1099      86.289  55.188  -6.177  1.00 49.64           C  
ANISOU 2259  CB  MET B1099     4520   4208  10133   -270   1542  -1096
ATOM   2260  CG  MET B1099      85.763  53.767  -6.413  1.00 53.53           C  
ANISOU 2260  CG  MET B1099     4916   4489  10934   -263   1645  -1069
ATOM   2261  SD  MET B1099      86.476  52.910  -7.849  1.00 49.19           S  
ANISOU 2261  SD  MET B1099     4357   3955  10376   -344   1747  -1286
ATOM   2262  CE  MET B1099      86.031  54.088  -9.149  1.00 36.10           C  
ANISOU 2262  CE  MET B1099     2648   2399   8669   -426   1847  -1614
ATOM   2263  H   MET B1099      87.849  54.070  -4.395  1.00  0.00           H  
ATOM   2264  N   THR B1100      88.892  56.905  -4.600  1.00 38.56           N  
ANISOU 2264  N   THR B1100     3433   3240   7976   -232   1193   -852
ATOM   2265  CA  THR B1100      89.257  58.219  -4.075  1.00 38.04           C  
ANISOU 2265  CA  THR B1100     3445   3328   7678   -224   1094   -824
ATOM   2266  C   THR B1100      89.965  59.111  -5.113  1.00 29.19           C  
ANISOU 2266  C   THR B1100     2366   2378   6346   -284   1108  -1016
ATOM   2267  O   THR B1100      89.538  60.244  -5.325  1.00 37.09           O  
ANISOU 2267  O   THR B1100     3351   3447   7291   -302   1122  -1106
ATOM   2268  CB  THR B1100      90.169  58.122  -2.827  1.00 42.37           C  
ANISOU 2268  CB  THR B1100     4100   3941   8056   -180    952   -610
ATOM   2269  OG1 THR B1100      89.469  57.471  -1.776  1.00 45.47           O  
ANISOU 2269  OG1 THR B1100     4451   4200   8624   -127    925   -418
ATOM   2270  CG2 THR B1100      90.640  59.489  -2.312  1.00 45.47           C  
ANISOU 2270  CG2 THR B1100     4571   4487   8219   -177    858   -596
ATOM   2271  H   THR B1100      89.146  56.099  -4.041  1.00  0.00           H  
ATOM   2272  HG1 THR B1100      89.521  56.509  -1.929  1.00  0.00           H  
ATOM   2273  N   VAL B1101      91.007  58.579  -5.762  1.00 38.36           N  
ANISOU 2273  N   VAL B1101     3574   3611   7388   -314   1105  -1073
ATOM   2274  CA  VAL B1101      91.805  59.364  -6.691  1.00 37.74           C  
ANISOU 2274  CA  VAL B1101     3539   3713   7088   -368   1099  -1226
ATOM   2275  C   VAL B1101      91.017  59.767  -7.947  1.00 39.28           C  
ANISOU 2275  C   VAL B1101     3644   3920   7360   -432   1219  -1457
ATOM   2276  O   VAL B1101      91.157  60.901  -8.390  1.00 38.99           O  
ANISOU 2276  O   VAL B1101     3627   4030   7157   -467   1208  -1553
ATOM   2277  CB  VAL B1101      93.114  58.650  -7.095  1.00 45.78           C  
ANISOU 2277  CB  VAL B1101     4616   4801   7974   -385   1067  -1228
ATOM   2278  CG1 VAL B1101      93.905  59.422  -8.162  1.00 49.11           C  
ANISOU 2278  CG1 VAL B1101     5063   5407   8186   -442   1063  -1384
ATOM   2279  CG2 VAL B1101      94.001  58.451  -5.861  1.00 43.96           C  
ANISOU 2279  CG2 VAL B1101     4485   4590   7625   -330    948  -1017
ATOM   2280  H   VAL B1101      91.286  57.624  -5.591  1.00  0.00           H  
ATOM   2281  N   THR B1102      90.164  58.889  -8.482  1.00 43.18           N  
ANISOU 2281  N   THR B1102     4035   4262   8107   -451   1338  -1549
ATOM   2282  CA  THR B1102      89.318  59.268  -9.612  1.00 37.21           C  
ANISOU 2282  CA  THR B1102     3185   3510   7442   -519   1465  -1786
ATOM   2283  C   THR B1102      88.320  60.375  -9.223  1.00 34.59           C  
ANISOU 2283  C   THR B1102     2820   3174   7148   -505   1480  -1791
ATOM   2284  O   THR B1102      88.122  61.312  -9.998  1.00 37.46           O  
ANISOU 2284  O   THR B1102     3161   3652   7417   -563   1528  -1959
ATOM   2285  CB  THR B1102      88.521  58.079 -10.200  1.00 44.48           C  
ANISOU 2285  CB  THR B1102     3991   4242   8666   -542   1605  -1890
ATOM   2286  OG1 THR B1102      89.428  57.128 -10.738  1.00 47.85           O  
ANISOU 2286  OG1 THR B1102     4438   4691   9050   -573   1610  -1933
ATOM   2287  CG2 THR B1102      87.545  58.504 -11.308  1.00 53.43           C  
ANISOU 2287  CG2 THR B1102     5023   5376   9901   -614   1743  -2144
ATOM   2288  H   THR B1102      90.044  57.971  -8.081  1.00  0.00           H  
ATOM   2289  HG1 THR B1102      88.919  56.419 -11.157  1.00  0.00           H  
ATOM   2290  N   ARG B1103      87.740  60.272  -8.020  1.00 40.40           N  
ANISOU 2290  N   ARG B1103     3549   3785   8014   -433   1435  -1603
ATOM   2291  CA  ARG B1103      86.872  61.316  -7.485  1.00 40.07           C  
ANISOU 2291  CA  ARG B1103     3477   3736   8010   -412   1434  -1579
ATOM   2292  C   ARG B1103      87.620  62.638  -7.271  1.00 45.58           C  
ANISOU 2292  C   ARG B1103     4273   4636   8407   -418   1333  -1553
ATOM   2293  O   ARG B1103      87.064  63.700  -7.554  1.00 41.37           O  
ANISOU 2293  O   ARG B1103     3714   4169   7834   -445   1368  -1645
ATOM   2294  CB  ARG B1103      86.212  60.874  -6.177  1.00 52.36           C  
ANISOU 2294  CB  ARG B1103     5007   5130   9757   -331   1388  -1361
ATOM   2295  CG  ARG B1103      85.410  59.569  -6.267  1.00 59.42           C  
ANISOU 2295  CG  ARG B1103     5793   5805  10976   -314   1487  -1351
ATOM   2296  CD  ARG B1103      84.069  59.628  -5.542  1.00 71.29           C  
ANISOU 2296  CD  ARG B1103     7198   7148  12739   -263   1517  -1258
ATOM   2297  NE  ARG B1103      82.961  59.970  -6.442  1.00 80.64           N  
ANISOU 2297  NE  ARG B1103     8262   8256  14120   -306   1673  -1472
ATOM   2298  CZ  ARG B1103      81.772  59.350  -6.464  1.00 95.23           C  
ANISOU 2298  CZ  ARG B1103     9976   9891  16313   -286   1784  -1482
ATOM   2299  NH1 ARG B1103      81.496  58.341  -5.635  1.00 94.57           N  
ANISOU 2299  NH1 ARG B1103     9856   9644  16430   -219   1751  -1271
ATOM   2300  NH2 ARG B1103      80.851  59.737  -7.337  1.00 90.67           N1+
ANISOU 2300  NH2 ARG B1103     9295   9265  15888   -335   1932  -1704
ATOM   2301  H   ARG B1103      87.948  59.473  -7.427  1.00  0.00           H  
ATOM   2302  HE  ARG B1103      83.128  60.752  -7.062  1.00  0.00           H  
ATOM   2303 HH12 ARG B1103      80.607  57.864  -5.649  1.00  0.00           H  
ATOM   2304 HH11 ARG B1103      82.170  58.040  -4.947  1.00  0.00           H  
ATOM   2305 HH22 ARG B1103      79.949  59.288  -7.390  1.00  0.00           H  
ATOM   2306 HH21 ARG B1103      81.016  60.491  -7.987  1.00  0.00           H  
ATOM   2307  N   LEU B1104      88.880  62.554  -6.827  1.00 40.59           N  
ANISOU 2307  N   LEU B1104     3750   4098   7571   -396   1214  -1429
ATOM   2308  CA  LEU B1104      89.774  63.701  -6.731  1.00 40.45           C  
ANISOU 2308  CA  LEU B1104     3825   4271   7271   -406   1123  -1409
ATOM   2309  C   LEU B1104      90.010  64.355  -8.098  1.00 37.59           C  
ANISOU 2309  C   LEU B1104     3450   4063   6770   -486   1186  -1620
ATOM   2310  O   LEU B1104      89.833  65.565  -8.228  1.00 33.66           O  
ANISOU 2310  O   LEU B1104     2961   3678   6150   -509   1182  -1667
ATOM   2311  CB  LEU B1104      91.105  63.297  -6.074  1.00 36.29           C  
ANISOU 2311  CB  LEU B1104     3406   3802   6579   -372   1003  -1258
ATOM   2312  CG  LEU B1104      92.155  64.419  -5.992  1.00 40.10           C  
ANISOU 2312  CG  LEU B1104     3982   4467   6784   -378    910  -1228
ATOM   2313  CD1 LEU B1104      91.661  65.578  -5.124  1.00 35.49           C  
ANISOU 2313  CD1 LEU B1104     3410   3896   6176   -350    864  -1144
ATOM   2314  CD2 LEU B1104      93.475  63.852  -5.476  1.00 31.06           C  
ANISOU 2314  CD2 LEU B1104     2928   3355   5515   -349    815  -1103
ATOM   2315  H   LEU B1104      89.251  61.647  -6.549  1.00  0.00           H  
ATOM   2316  N   VAL B1105      90.370  63.544  -9.100  1.00 38.90           N  
ANISOU 2316  N   VAL B1105     3590   4237   6951   -531   1244  -1744
ATOM   2317  CA  VAL B1105      90.611  64.021 -10.456  1.00 39.96           C  
ANISOU 2317  CA  VAL B1105     3704   4531   6946   -616   1299  -1948
ATOM   2318  C   VAL B1105      89.372  64.732 -11.029  1.00 47.51           C  
ANISOU 2318  C   VAL B1105     4572   5484   7994   -664   1413  -2112
ATOM   2319  O   VAL B1105      89.498  65.783 -11.655  1.00 46.79           O  
ANISOU 2319  O   VAL B1105     4487   5562   7728   -719   1424  -2217
ATOM   2320  CB  VAL B1105      91.019  62.868 -11.410  1.00 44.87           C  
ANISOU 2320  CB  VAL B1105     4292   5134   7620   -660   1355  -2066
ATOM   2321  CG1 VAL B1105      91.011  63.268 -12.894  1.00 43.13           C  
ANISOU 2321  CG1 VAL B1105     4024   5067   7296   -759   1432  -2306
ATOM   2322  CG2 VAL B1105      92.409  62.336 -11.045  1.00 46.08           C  
ANISOU 2322  CG2 VAL B1105     4536   5334   7636   -625   1245  -1928
ATOM   2323  H   VAL B1105      90.496  62.548  -8.924  1.00  0.00           H  
ATOM   2324  N   ASN B1106      88.193  64.153 -10.782  1.00 45.85           N  
ANISOU 2324  N   ASN B1106     4275   5080   8064   -643   1500  -2127
ATOM   2325  CA  ASN B1106      86.930  64.726 -11.232  1.00 56.40           C  
ANISOU 2325  CA  ASN B1106     5516   6387   9525   -686   1623  -2287
ATOM   2326  C   ASN B1106      86.625  66.055 -10.558  1.00 52.29           C  
ANISOU 2326  C   ASN B1106     5024   5933   8908   -661   1574  -2206
ATOM   2327  O   ASN B1106      86.239  66.999 -11.241  1.00 55.10           O  
ANISOU 2327  O   ASN B1106     5352   6404   9179   -722   1637  -2349
ATOM   2328  CB  ASN B1106      85.774  63.734 -11.018  1.00 54.43           C  
ANISOU 2328  CB  ASN B1106     5157   5892   9630   -662   1731  -2310
ATOM   2329  CG  ASN B1106      85.186  63.243 -12.333  1.00 52.10           C  
ANISOU 2329  CG  ASN B1106     4763   5570   9463   -747   1888  -2572
ATOM   2330  OD1 ASN B1106      83.973  63.277 -12.523  1.00 69.26           O  
ANISOU 2330  OD1 ASN B1106     6954   7840  11519   -804   1894  -2681
ATOM   2331  ND2 ASN B1106      86.022  62.796 -13.260  1.00 63.07           N  
ANISOU 2331  ND2 ASN B1106     6040   6828  11094   -761   2018  -2682
ATOM   2332  H   ASN B1106      88.169  63.295 -10.235  1.00  0.00           H  
ATOM   2333 HD22 ASN B1106      85.664  62.478 -14.146  1.00  0.00           H  
ATOM   2334 HD21 ASN B1106      87.017  62.780 -13.091  1.00  0.00           H  
ATOM   2335  N   THR B1107      86.851  66.126  -9.248  1.00 55.73           N  
ANISOU 2335  N   THR B1107     5518   6308   9348   -578   1463  -1978
ATOM   2336  CA  THR B1107      86.689  67.361  -8.496  1.00 43.63           C  
ANISOU 2336  CA  THR B1107     4019   4838   7720   -552   1402  -1883
ATOM   2337  C   THR B1107      87.576  68.502  -9.038  1.00 45.72           C  
ANISOU 2337  C   THR B1107     4355   5334   7680   -601   1357  -1932
ATOM   2338  O   THR B1107      87.090  69.618  -9.229  1.00 49.38           O  
ANISOU 2338  O   THR B1107     4800   5878   8081   -631   1392  -1991
ATOM   2339  CB  THR B1107      87.002  67.123  -7.007  1.00 59.72           C  
ANISOU 2339  CB  THR B1107     6117   6794   9779   -463   1274  -1631
ATOM   2340  OG1 THR B1107      86.100  66.129  -6.571  1.00 59.02           O  
ANISOU 2340  OG1 THR B1107     5951   6496   9974   -418   1314  -1569
ATOM   2341  CG2 THR B1107      86.825  68.353  -6.129  1.00 65.39           C  
ANISOU 2341  CG2 THR B1107     6861   7568  10416   -440   1216  -1542
ATOM   2342  H   THR B1107      87.162  65.305  -8.739  1.00  0.00           H  
ATOM   2343  HG1 THR B1107      86.424  65.257  -6.855  1.00  0.00           H  
ATOM   2344  N   LEU B1108      88.839  68.181  -9.347  1.00 42.31           N  
ANISOU 2344  N   LEU B1108     3999   5007   7067   -609   1283  -1902
ATOM   2345  CA  LEU B1108      89.781  69.133  -9.928  1.00 41.07           C  
ANISOU 2345  CA  LEU B1108     3906   5072   6625   -652   1232  -1930
ATOM   2346  C   LEU B1108      89.409  69.539 -11.362  1.00 44.11           C  
ANISOU 2346  C   LEU B1108     4228   5586   6943   -751   1342  -2163
ATOM   2347  O   LEU B1108      89.571  70.716 -11.699  1.00 56.69           O  
ANISOU 2347  O   LEU B1108     5842   7351   8344   -792   1333  -2196
ATOM   2348  CB  LEU B1108      91.212  68.573  -9.917  1.00 34.48           C  
ANISOU 2348  CB  LEU B1108     3156   4302   5643   -632   1130  -1838
ATOM   2349  CG  LEU B1108      91.828  68.333  -8.527  1.00 42.55           C  
ANISOU 2349  CG  LEU B1108     4258   5247   6659   -547   1009  -1612
ATOM   2350  CD1 LEU B1108      93.124  67.533  -8.669  1.00 37.59           C  
ANISOU 2350  CD1 LEU B1108     3690   4659   5932   -538    944  -1564
ATOM   2351  CD2 LEU B1108      92.103  69.638  -7.780  1.00 36.52           C  
ANISOU 2351  CD2 LEU B1108     3555   4568   5751   -522    929  -1496
ATOM   2352  H   LEU B1108      89.175  67.238  -9.175  1.00  0.00           H  
ATOM   2353  N   LYS B1109      88.895  68.594 -12.163  1.00 53.12           N  
ANISOU 2353  N   LYS B1109     5291   6650   8241   -793   1448  -2324
ATOM   2354  CA  LYS B1109      88.392  68.861 -13.514  1.00 58.59           C  
ANISOU 2354  CA  LYS B1109     5910   7454   8894   -897   1568  -2572
ATOM   2355  C   LYS B1109      87.260  69.898 -13.535  1.00 58.23           C  
ANISOU 2355  C   LYS B1109     5811   7423   8890   -925   1653  -2652
ATOM   2356  O   LYS B1109      87.220  70.740 -14.432  1.00 60.35           O  
ANISOU 2356  O   LYS B1109     6063   7873   8990  -1006   1700  -2787
ATOM   2357  CB  LYS B1109      87.916  67.563 -14.195  1.00 61.12           C  
ANISOU 2357  CB  LYS B1109     6145   7649   9427   -933   1679  -2734
ATOM   2358  CG  LYS B1109      89.031  66.789 -14.899  1.00 63.33           C  
ANISOU 2358  CG  LYS B1109     6455   8012   9594   -963   1636  -2770
ATOM   2359  CD  LYS B1109      88.479  65.591 -15.676  1.00 68.60           C  
ANISOU 2359  CD  LYS B1109     7027   8559  10478  -1013   1762  -2955
ATOM   2360  CE  LYS B1109      89.585  64.847 -16.433  1.00 76.10           C  
ANISOU 2360  CE  LYS B1109     7999   9602  11313  -1050   1722  -3002
ATOM   2361  NZ  LYS B1109      89.101  63.581 -17.009  1.00 69.98           N1+
ANISOU 2361  NZ  LYS B1109     7135   8675  10779  -1086   1837  -3152
ATOM   2362  H   LYS B1109      88.825  67.638 -11.824  1.00  0.00           H  
ATOM   2363  HZ1 LYS B1109      89.850  63.119 -17.496  1.00  0.00           H  
ATOM   2364  HZ2 LYS B1109      88.767  62.966 -16.287  1.00  0.00           H  
ATOM   2365  HZ3 LYS B1109      88.355  63.748 -17.662  1.00  0.00           H  
ATOM   2366  N   GLU B1110      86.375  69.835 -12.534  1.00 61.71           N  
ANISOU 2366  N   GLU B1110     6219   7678   9548   -860   1671  -2560
ATOM   2367  CA  GLU B1110      85.257  70.764 -12.377  1.00 68.50           C  
ANISOU 2367  CA  GLU B1110     7019   8522  10484   -876   1754  -2621
ATOM   2368  C   GLU B1110      85.689  72.167 -11.914  1.00 77.27           C  
ANISOU 2368  C   GLU B1110     8203   9784  11370   -865   1667  -2502
ATOM   2369  O   GLU B1110      84.856  73.073 -11.900  1.00 62.15           O  
ANISOU 2369  O   GLU B1110     6245   7886   9481   -887   1733  -2553
ATOM   2370  CB  GLU B1110      84.243  70.181 -11.386  1.00 74.55           C  
ANISOU 2370  CB  GLU B1110     7720   9035  11567   -802   1787  -2538
ATOM   2371  CG  GLU B1110      83.593  68.868 -11.861  1.00 73.77           C  
ANISOU 2371  CG  GLU B1110     7527   8759  11740   -813   1899  -2659
ATOM   2372  CD  GLU B1110      82.890  68.103 -10.741  1.00 88.02           C  
ANISOU 2372  CD  GLU B1110     9287  10315  13839   -720   1887  -2502
ATOM   2373  OE1 GLU B1110      82.920  68.553  -9.577  1.00107.15           O  
ANISOU 2373  OE1 GLU B1110    11757  12711  16244   -648   1782  -2299
ATOM   2374  OE2 GLU B1110      82.282  67.060 -11.050  1.00 78.19           O1-
ANISOU 2374  OE2 GLU B1110     7956   8902  12848   -721   1982  -2579
ATOM   2375  H   GLU B1110      86.470  69.105 -11.834  1.00  0.00           H  
ATOM   2376  N   GLY B1111      86.964  72.336 -11.545  1.00 55.65           N  
ANISOU 2376  N   GLY B1111     5571   7143   8428   -831   1526  -2343
ATOM   2377  CA  GLY B1111      87.523  73.636 -11.189  1.00 52.03           C  
ANISOU 2377  CA  GLY B1111     5184   6831   7754   -824   1442  -2228
ATOM   2378  C   GLY B1111      87.497  73.866  -9.677  1.00 47.30           C  
ANISOU 2378  C   GLY B1111     4630   6115   7226   -731   1347  -2011
ATOM   2379  O   GLY B1111      87.806  74.973  -9.235  1.00 58.66           O  
ANISOU 2379  O   GLY B1111     6118   7644   8524   -722   1287  -1913
ATOM   2380  H   GLY B1111      87.590  71.539 -11.555  1.00  0.00           H  
ATOM   2381  N   LYS B1112      87.128  72.855  -8.879  1.00 45.49           N  
ANISOU 2381  N   LYS B1112     4379   5689   7214   -667   1332  -1935
ATOM   2382  CA  LYS B1112      87.144  72.949  -7.422  1.00 44.40           C  
ANISOU 2382  CA  LYS B1112     4278   5444   7148   -584   1234  -1730
ATOM   2383  C   LYS B1112      88.582  72.866  -6.902  1.00 42.94           C  
ANISOU 2383  C   LYS B1112     4207   5326   6782   -545   1091  -1569
ATOM   2384  O   LYS B1112      89.367  72.042  -7.377  1.00 37.36           O  
ANISOU 2384  O   LYS B1112     3533   4640   6021   -550   1067  -1582
ATOM   2385  CB  LYS B1112      86.293  71.841  -6.799  1.00 51.06           C  
ANISOU 2385  CB  LYS B1112     5055   6067   8278   -532   1263  -1690
ATOM   2386  CG  LYS B1112      84.813  71.902  -7.183  1.00 63.91           C  
ANISOU 2386  CG  LYS B1112     6558   7593  10132   -559   1407  -1833
ATOM   2387  CD  LYS B1112      83.986  70.858  -6.428  1.00 63.10           C  
ANISOU 2387  CD  LYS B1112     6385   7264  10325   -495   1421  -1752
ATOM   2388  CE  LYS B1112      82.523  70.802  -6.858  1.00 72.79           C  
ANISOU 2388  CE  LYS B1112     7476   8372  11808   -519   1576  -1901
ATOM   2389  NZ  LYS B1112      81.844  72.082  -6.619  1.00 63.97           N1+
ANISOU 2389  NZ  LYS B1112     6326   7300  10677   -532   1608  -1923
ATOM   2390  H   LYS B1112      86.912  71.951  -9.280  1.00  0.00           H  
ATOM   2391  HZ1 LYS B1112      80.887  72.016  -6.916  1.00  0.00           H  
ATOM   2392  HZ2 LYS B1112      81.866  72.312  -5.641  1.00  0.00           H  
ATOM   2393  HZ3 LYS B1112      82.294  72.814  -7.140  1.00  0.00           H  
ATOM   2394  N   ARG B1113      88.910  73.743  -5.961  1.00 47.71           N  
ANISOU 2394  N   ARG B1113     4866   5958   7302   -509   1004  -1426
ATOM   2395  CA  ARG B1113      90.232  73.842  -5.355  1.00 46.50           C  
ANISOU 2395  CA  ARG B1113     4818   5866   6983   -474    876  -1278
ATOM   2396  C   ARG B1113      90.067  74.051  -3.865  1.00 41.43           C  
ANISOU 2396  C   ARG B1113     4200   5126   6412   -410    792  -1110
ATOM   2397  O   ARG B1113      88.977  74.439  -3.441  1.00 45.66           O  
ANISOU 2397  O   ARG B1113     4673   5575   7098   -398    828  -1105
ATOM   2398  CB  ARG B1113      90.983  75.060  -5.919  1.00 38.01           C  
ANISOU 2398  CB  ARG B1113     3790   4979   5671   -515    855  -1290
ATOM   2399  CG  ARG B1113      91.216  75.008  -7.427  1.00 43.85           C  
ANISOU 2399  CG  ARG B1113     4506   5855   6299   -586    923  -1449
ATOM   2400  CD  ARG B1113      92.227  73.922  -7.794  1.00 47.68           C  
ANISOU 2400  CD  ARG B1113     5029   6352   6733   -579    879  -1445
ATOM   2401  NE  ARG B1113      92.473  73.896  -9.236  1.00 47.48           N  
ANISOU 2401  NE  ARG B1113     4976   6471   6591   -653    936  -1598
ATOM   2402  CZ  ARG B1113      91.722  73.269 -10.143  1.00 48.77           C  
ANISOU 2402  CZ  ARG B1113     5061   6611   6855   -705   1043  -1774
ATOM   2403  NH1 ARG B1113      90.642  72.575  -9.792  1.00 49.70           N  
ANISOU 2403  NH1 ARG B1113     5117   6552   7212   -685   1112  -1817
ATOM   2404  NH2 ARG B1113      92.066  73.334 -11.422  1.00 37.88           N1+
ANISOU 2404  NH2 ARG B1113     3661   5388   5343   -779   1082  -1910
ATOM   2405  H   ARG B1113      88.210  74.363  -5.572  1.00  0.00           H  
ATOM   2406  HE  ARG B1113      93.284  74.422  -9.563  1.00  0.00           H  
ATOM   2407 HH12 ARG B1113      90.111  72.053 -10.482  1.00  0.00           H  
ATOM   2408 HH11 ARG B1113      90.350  72.486  -8.817  1.00  0.00           H  
ATOM   2409 HH22 ARG B1113      91.523  72.875 -12.135  1.00  0.00           H  
ATOM   2410 HH21 ARG B1113      92.885  73.858 -11.699  1.00  0.00           H  
ATOM   2411  N   LEU B1114      91.167  73.888  -3.118  1.00 34.40           N  
ANISOU 2411  N   LEU B1114     3399   4258   5414   -374    681   -977
ATOM   2412  CA  LEU B1114      91.216  74.208  -1.692  1.00 35.09           C  
ANISOU 2412  CA  LEU B1114     3517   4281   5532   -325    593   -824
ATOM   2413  C   LEU B1114      90.789  75.666  -1.439  1.00 35.30           C  
ANISOU 2413  C   LEU B1114     3530   4360   5523   -341    603   -818
ATOM   2414  O   LEU B1114      91.119  76.552  -2.240  1.00 38.74           O  
ANISOU 2414  O   LEU B1114     3978   4921   5819   -382    635   -880
ATOM   2415  CB  LEU B1114      92.628  73.984  -1.125  1.00 33.75           C  
ANISOU 2415  CB  LEU B1114     3447   4150   5226   -297    485   -709
ATOM   2416  CG  LEU B1114      93.105  72.524  -1.144  1.00 27.25           C  
ANISOU 2416  CG  LEU B1114     2644   3267   4441   -277    466   -691
ATOM   2417  CD1 LEU B1114      94.581  72.438  -0.752  1.00 31.00           C  
ANISOU 2417  CD1 LEU B1114     3215   3802   4758   -260    377   -605
ATOM   2418  CD2 LEU B1114      92.262  71.633  -0.226  1.00 29.73           C  
ANISOU 2418  CD2 LEU B1114     2915   3434   4945   -239    456   -619
ATOM   2419  H   LEU B1114      92.040  73.630  -3.554  1.00  0.00           H  
ATOM   2420  N   PRO B1115      90.015  75.879  -0.359  1.00 35.74           N  
ANISOU 2420  N   PRO B1115     3555   4324   5699   -309    573   -735
ATOM   2421  CA  PRO B1115      89.467  77.202  -0.080  1.00 42.17           C  
ANISOU 2421  CA  PRO B1115     4343   5171   6508   -324    590   -732
ATOM   2422  C   PRO B1115      90.555  78.142   0.439  1.00 41.79           C  
ANISOU 2422  C   PRO B1115     4379   5209   6288   -321    505   -636
ATOM   2423  O   PRO B1115      91.606  77.681   0.888  1.00 34.54           O  
ANISOU 2423  O   PRO B1115     3535   4301   5284   -297    423   -558
ATOM   2424  CB  PRO B1115      88.420  76.909   0.992  1.00 46.08           C  
ANISOU 2424  CB  PRO B1115     4772   5529   7207   -285    574   -665
ATOM   2425  CG  PRO B1115      88.991  75.746   1.777  1.00 50.41           C  
ANISOU 2425  CG  PRO B1115     5366   6013   7774   -242    483   -557
ATOM   2426  CD  PRO B1115      89.748  74.940   0.734  1.00 44.70           C  
ANISOU 2426  CD  PRO B1115     4680   5331   6972   -258    511   -627
ATOM   2427  N   CYS B1116      90.273  79.444   0.406  1.00 34.32           N  
ANISOU 2427  N   CYS B1116     3418   4321   5299   -346    532   -645
ATOM   2428  CA  CYS B1116      91.165  80.450   0.977  1.00 33.36           C  
ANISOU 2428  CA  CYS B1116     3365   4266   5042   -344    462   -552
ATOM   2429  C   CYS B1116      91.338  80.183   2.480  1.00 40.26           C  
ANISOU 2429  C   CYS B1116     4266   5052   5979   -300    361   -428
ATOM   2430  O   CYS B1116      90.320  80.052   3.173  1.00 36.74           O  
ANISOU 2430  O   CYS B1116     3759   4514   5685   -283    359   -406
ATOM   2431  CB  CYS B1116      90.621  81.864   0.745  1.00 40.46           C  
ANISOU 2431  CB  CYS B1116     4230   5230   5910   -381    520   -579
ATOM   2432  SG  CYS B1116      91.830  83.161   1.176  1.00 38.16           S  
ANISOU 2432  SG  CYS B1116     4018   5024   5456   -385    452   -469
ATOM   2433  H   CYS B1116      89.385  79.759   0.044  1.00  0.00           H  
ATOM   2434  HG  CYS B1116      92.041  82.915   2.479  1.00  0.00           H  
ATOM   2435  N   PRO B1117      92.595  80.057   2.960  1.00 34.65           N  
ANISOU 2435  N   PRO B1117     3640   4369   5154   -284    278   -349
ATOM   2436  CA  PRO B1117      92.821  79.884   4.395  1.00 33.04           C  
ANISOU 2436  CA  PRO B1117     3464   4098   4992   -253    183   -245
ATOM   2437  C   PRO B1117      92.266  81.071   5.184  1.00 33.70           C  
ANISOU 2437  C   PRO B1117     3518   4169   5116   -262    170   -204
ATOM   2438  O   PRO B1117      92.223  82.184   4.641  1.00 31.11           O  
ANISOU 2438  O   PRO B1117     3182   3904   4735   -290    219   -233
ATOM   2439  CB  PRO B1117      94.344  79.816   4.528  1.00 29.16           C  
ANISOU 2439  CB  PRO B1117     3067   3657   4356   -246    122   -196
ATOM   2440  CG  PRO B1117      94.858  79.465   3.155  1.00 32.02           C  
ANISOU 2440  CG  PRO B1117     3442   4088   4634   -261    175   -269
ATOM   2441  CD  PRO B1117      93.852  80.089   2.216  1.00 32.47           C  
ANISOU 2441  CD  PRO B1117     3432   4187   4717   -295    268   -357
ATOM   2442  N   PRO B1118      91.884  80.841   6.453  1.00 42.65           N  
ANISOU 2442  N   PRO B1118     4635   5229   6341   -241    101   -132
ATOM   2443  CA  PRO B1118      91.484  81.956   7.309  1.00 36.68           C  
ANISOU 2443  CA  PRO B1118     3849   4463   5624   -252     82    -95
ATOM   2444  C   PRO B1118      92.606  82.985   7.410  1.00 40.33           C  
ANISOU 2444  C   PRO B1118     4380   4990   5951   -271     61    -66
ATOM   2445  O   PRO B1118      93.777  82.598   7.453  1.00 35.22           O  
ANISOU 2445  O   PRO B1118     3810   4372   5200   -263     19    -41
ATOM   2446  CB  PRO B1118      91.213  81.302   8.664  1.00 46.05           C  
ANISOU 2446  CB  PRO B1118     5022   5578   6895   -228    -10    -13
ATOM   2447  CG  PRO B1118      90.976  79.840   8.363  1.00 46.14           C  
ANISOU 2447  CG  PRO B1118     5020   5546   6965   -203     -7    -19
ATOM   2448  CD  PRO B1118      91.886  79.575   7.183  1.00 47.74           C  
ANISOU 2448  CD  PRO B1118     5285   5807   7046   -211     35    -77
ATOM   2449  N   ASN B1119      92.234  84.265   7.393  1.00 30.43           N  
ANISOU 2449  N   ASN B1119     3094   3757   4709   -295     96    -69
ATOM   2450  CA  ASN B1119      93.162  85.391   7.549  1.00 33.78           C  
ANISOU 2450  CA  ASN B1119     3570   4230   5032   -313     84    -30
ATOM   2451  C   ASN B1119      94.120  85.572   6.359  1.00 32.44           C  
ANISOU 2451  C   ASN B1119     3452   4148   4723   -323    124    -51
ATOM   2452  O   ASN B1119      95.023  86.401   6.453  1.00 33.81           O  
ANISOU 2452  O   ASN B1119     3671   4358   4817   -331    110     -4
ATOM   2453  CB  ASN B1119      93.969  85.264   8.868  1.00 37.52           C  
ANISOU 2453  CB  ASN B1119     4096   4666   5493   -302    -15     39
ATOM   2454  CG  ASN B1119      93.078  85.273  10.105  1.00 48.81           C  
ANISOU 2454  CG  ASN B1119     5469   6031   7045   -301    -65     68
ATOM   2455  OD1 ASN B1119      92.271  86.180  10.288  1.00 38.77           O  
ANISOU 2455  OD1 ASN B1119     4136   4748   5845   -319    -31     63
ATOM   2456  ND2 ASN B1119      93.202  84.263  10.958  1.00 39.42           N  
ANISOU 2456  ND2 ASN B1119     4296   4805   5877   -283   -145    103
ATOM   2457  H   ASN B1119      91.251  84.496   7.320  1.00  0.00           H  
ATOM   2458 HD22 ASN B1119      92.631  84.218  11.789  1.00  0.00           H  
ATOM   2459 HD21 ASN B1119      93.863  83.518  10.784  1.00  0.00           H  
ATOM   2460  N   CYS B1120      93.937  84.823   5.266  1.00 33.10           N  
ANISOU 2460  N   CYS B1120     3524   4267   4785   -323    175   -118
ATOM   2461  CA  CYS B1120      94.808  84.917   4.099  1.00 33.81           C  
ANISOU 2461  CA  CYS B1120     3655   4452   4737   -335    204   -137
ATOM   2462  C   CYS B1120      94.224  85.984   3.165  1.00 34.98           C  
ANISOU 2462  C   CYS B1120     3759   4684   4846   -375    293   -182
ATOM   2463  O   CYS B1120      93.080  85.823   2.734  1.00 34.66           O  
ANISOU 2463  O   CYS B1120     3655   4639   4874   -392    360   -263
ATOM   2464  CB  CYS B1120      94.952  83.570   3.381  1.00 26.17           C  
ANISOU 2464  CB  CYS B1120     2699   3491   3754   -322    209   -192
ATOM   2465  SG  CYS B1120      95.967  83.661   1.861  1.00 33.28           S  
ANISOU 2465  SG  CYS B1120     3632   4524   4487   -343    246   -226
ATOM   2466  H   CYS B1120      93.144  84.194   5.207  1.00  0.00           H  
ATOM   2467  HG  CYS B1120      95.497  84.773   1.274  1.00  0.00           H  
ATOM   2468  N   PRO B1121      94.992  87.059   2.884  1.00 36.33           N  
ANISOU 2468  N   PRO B1121     3960   4930   4911   -393    299   -129
ATOM   2469  CA  PRO B1121      94.568  88.092   1.932  1.00 37.20           C  
ANISOU 2469  CA  PRO B1121     4033   5140   4959   -437    382   -156
ATOM   2470  C   PRO B1121      94.309  87.513   0.543  1.00 38.51           C  
ANISOU 2470  C   PRO B1121     4177   5399   5055   -463    445   -255
ATOM   2471  O   PRO B1121      95.012  86.584   0.133  1.00 35.62           O  
ANISOU 2471  O   PRO B1121     3846   5053   4634   -448    414   -270
ATOM   2472  CB  PRO B1121      95.750  89.061   1.879  1.00 41.04           C  
ANISOU 2472  CB  PRO B1121     4569   5687   5336   -441    355    -55
ATOM   2473  CG  PRO B1121      96.576  88.779   3.104  1.00 43.35           C  
ANISOU 2473  CG  PRO B1121     4910   5881   5677   -402    268     16
ATOM   2474  CD  PRO B1121      96.345  87.314   3.372  1.00 37.47           C  
ANISOU 2474  CD  PRO B1121     4173   5072   4991   -373    231    -36
ATOM   2475  N   ASP B1122      93.328  88.081  -0.161  1.00 39.24           N  
ANISOU 2475  N   ASP B1122     4210   5552   5147   -508    537   -330
ATOM   2476  CA  ASP B1122      92.958  87.608  -1.493  1.00 36.33           C  
ANISOU 2476  CA  ASP B1122     3811   5276   4718   -544    608   -448
ATOM   2477  C   ASP B1122      94.146  87.649  -2.468  1.00 31.50           C  
ANISOU 2477  C   ASP B1122     3245   4798   3925   -559    585   -421
ATOM   2478  O   ASP B1122      94.333  86.693  -3.208  1.00 33.32           O  
ANISOU 2478  O   ASP B1122     3474   5071   4114   -567    594   -498
ATOM   2479  CB  ASP B1122      91.756  88.358  -2.087  1.00 45.16           C  
ANISOU 2479  CB  ASP B1122     4856   6452   5849   -600    721   -538
ATOM   2480  CG  ASP B1122      91.239  87.704  -3.372  1.00 58.45           C  
ANISOU 2480  CG  ASP B1122     6496   8209   7502   -642    803   -692
ATOM   2481  OD1 ASP B1122      90.876  86.511  -3.334  1.00 62.90           O  
ANISOU 2481  OD1 ASP B1122     7039   8680   8176   -619    803   -764
ATOM   2482  OD2 ASP B1122      91.147  88.408  -4.395  1.00 61.06           O1-
ANISOU 2482  OD2 ASP B1122     6810   8693   7696   -702    869   -742
ATOM   2483  H   ASP B1122      92.821  88.870   0.215  1.00  0.00           H  
ATOM   2484  N   GLU B1123      94.981  88.692  -2.403  1.00 32.93           N  
ANISOU 2484  N   GLU B1123     3459   5044   4008   -563    557   -308
ATOM   2485  CA  GLU B1123      96.176  88.799  -3.238  1.00 37.22           C  
ANISOU 2485  CA  GLU B1123     4038   5713   4388   -571    527   -256
ATOM   2486  C   GLU B1123      97.173  87.638  -3.053  1.00 43.95           C  
ANISOU 2486  C   GLU B1123     4940   6510   5249   -523    447   -237
ATOM   2487  O   GLU B1123      97.794  87.221  -4.030  1.00 30.14           O  
ANISOU 2487  O   GLU B1123     3200   4860   3392   -534    436   -255
ATOM   2488  CB  GLU B1123      96.871  90.158  -3.043  1.00 49.91           C  
ANISOU 2488  CB  GLU B1123     5667   7374   5920   -575    509   -115
ATOM   2489  CG  GLU B1123      97.250  90.503  -1.585  1.00 75.98           C  
ANISOU 2489  CG  GLU B1123     9003  10533   9332   -529    449    -10
ATOM   2490  CD  GLU B1123      96.217  91.345  -0.845  1.00 69.35           C  
ANISOU 2490  CD  GLU B1123     8126   9633   8591   -546    495     -9
ATOM   2491  OE1 GLU B1123      95.026  91.291  -1.213  1.00 47.71           O  
ANISOU 2491  OE1 GLU B1123     5330   6915   5880   -580    569   -111
ATOM   2492  OE2 GLU B1123      96.615  92.053   0.100  1.00 70.72           O1-
ANISOU 2492  OE2 GLU B1123     8319   9729   8821   -525    459     87
ATOM   2493  H   GLU B1123      94.802  89.466  -1.760  1.00  0.00           H  
ATOM   2494  N   VAL B1124      97.284  87.102  -1.831  1.00 27.21           N  
ANISOU 2494  N   VAL B1124     2847   4239   3251   -474    392   -202
ATOM   2495  CA  VAL B1124      98.086  85.910  -1.589  1.00 31.22           C  
ANISOU 2495  CA  VAL B1124     3398   4691   3771   -432    326   -194
ATOM   2496  C   VAL B1124      97.382  84.667  -2.155  1.00 30.50           C  
ANISOU 2496  C   VAL B1124     3276   4588   3724   -442    362   -321
ATOM   2497  O   VAL B1124      98.021  83.848  -2.816  1.00 29.28           O  
ANISOU 2497  O   VAL B1124     3135   4478   3509   -440    347   -352
ATOM   2498  CB  VAL B1124      98.377  85.684  -0.088  1.00 29.65           C  
ANISOU 2498  CB  VAL B1124     3237   4349   3677   -386    259   -124
ATOM   2499  CG1 VAL B1124      99.121  84.364   0.179  1.00 28.85           C  
ANISOU 2499  CG1 VAL B1124     3177   4194   3589   -350    204   -130
ATOM   2500  CG2 VAL B1124      99.185  86.854   0.475  1.00 30.00           C  
ANISOU 2500  CG2 VAL B1124     3311   4397   3687   -379    229     -7
ATOM   2501  H   VAL B1124      96.723  87.456  -1.066  1.00  0.00           H  
ATOM   2502  N   TYR B1125      96.071  84.554  -1.915  1.00 33.99           N  
ANISOU 2502  N   TYR B1125     3668   4968   4280   -454    414   -393
ATOM   2503  CA  TYR B1125      95.266  83.451  -2.433  1.00 31.71           C  
ANISOU 2503  CA  TYR B1125     3336   4645   4066   -463    462   -516
ATOM   2504  C   TYR B1125      95.276  83.389  -3.969  1.00 35.52           C  
ANISOU 2504  C   TYR B1125     3790   5269   4434   -516    524   -619
ATOM   2505  O   TYR B1125      95.276  82.302  -4.533  1.00 35.56           O  
ANISOU 2505  O   TYR B1125     3782   5267   4462   -520    540   -705
ATOM   2506  CB  TYR B1125      93.824  83.536  -1.912  1.00 33.61           C  
ANISOU 2506  CB  TYR B1125     3513   4794   4461   -468    517   -569
ATOM   2507  CG  TYR B1125      92.954  82.340  -2.276  1.00 33.13           C  
ANISOU 2507  CG  TYR B1125     3400   4665   4521   -469    568   -684
ATOM   2508  CD1 TYR B1125      93.341  81.040  -1.892  1.00 36.78           C  
ANISOU 2508  CD1 TYR B1125     3887   5038   5048   -429    517   -666
ATOM   2509  CD2 TYR B1125      91.767  82.516  -3.014  1.00 35.77           C  
ANISOU 2509  CD2 TYR B1125     3657   5018   4915   -513    675   -809
ATOM   2510  CE1 TYR B1125      92.546  79.930  -2.228  1.00 40.58           C  
ANISOU 2510  CE1 TYR B1125     4316   5445   5655   -429    568   -759
ATOM   2511  CE2 TYR B1125      90.969  81.406  -3.348  1.00 39.38           C  
ANISOU 2511  CE2 TYR B1125     4059   5396   5505   -514    730   -915
ATOM   2512  CZ  TYR B1125      91.352  80.114  -2.945  1.00 47.10           C  
ANISOU 2512  CZ  TYR B1125     5062   6280   6554   -470    675   -884
ATOM   2513  OH  TYR B1125      90.576  79.039  -3.262  1.00 44.37           O  
ANISOU 2513  OH  TYR B1125     4656   5845   6356   -470    735   -980
ATOM   2514  H   TYR B1125      95.601  85.271  -1.370  1.00  0.00           H  
ATOM   2515  HH  TYR B1125      90.883  78.216  -2.835  1.00  0.00           H  
ATOM   2516  N   GLN B1126      95.338  84.544  -4.637  1.00 32.46           N  
ANISOU 2516  N   GLN B1126     3391   5017   3924   -560    560   -610
ATOM   2517  CA  GLN B1126      95.422  84.596  -6.089  1.00 42.70           C  
ANISOU 2517  CA  GLN B1126     4659   6479   5084   -621    613   -704
ATOM   2518  C   GLN B1126      96.743  84.039  -6.616  1.00 36.38           C  
ANISOU 2518  C   GLN B1126     3901   5749   4172   -607    545   -663
ATOM   2519  O   GLN B1126      96.720  83.316  -7.607  1.00 41.68           O  
ANISOU 2519  O   GLN B1126     4547   6498   4792   -641    573   -768
ATOM   2520  CB  GLN B1126      95.173  86.018  -6.623  1.00 40.57           C  
ANISOU 2520  CB  GLN B1126     4366   6353   4695   -676    664   -688
ATOM   2521  CG  GLN B1126      93.740  86.550  -6.426  1.00 42.99           C  
ANISOU 2521  CG  GLN B1126     4615   6617   5100   -705    756   -764
ATOM   2522  CD  GLN B1126      92.649  85.561  -6.828  1.00 49.14           C  
ANISOU 2522  CD  GLN B1126     5335   7339   5996   -727    835   -937
ATOM   2523  OE1 GLN B1126      92.697  84.983  -7.912  1.00 55.69           O  
ANISOU 2523  OE1 GLN B1126     6144   8259   6757   -768    870  -1049
ATOM   2524  NE2 GLN B1126      91.667  85.347  -5.966  1.00 51.48           N  
ANISOU 2524  NE2 GLN B1126     5597   7481   6481   -699    862   -958
ATOM   2525  H   GLN B1126      95.298  85.418  -4.117  1.00  0.00           H  
ATOM   2526 HE22 GLN B1126      90.922  84.705  -6.180  1.00  0.00           H  
ATOM   2527 HE21 GLN B1126      91.624  85.848  -5.073  1.00  0.00           H  
ATOM   2528  N   LEU B1127      97.856  84.322  -5.927  1.00 38.57           N  
ANISOU 2528  N   LEU B1127     4235   5996   4422   -559    461   -517
ATOM   2529  CA  LEU B1127      99.145  83.687  -6.213  1.00 32.80           C  
ANISOU 2529  CA  LEU B1127     3541   5299   3619   -535    394   -470
ATOM   2530  C   LEU B1127      99.081  82.161  -6.069  1.00 34.05           C  
ANISOU 2530  C   LEU B1127     3703   5355   3878   -510    385   -549
ATOM   2531  O   LEU B1127      99.567  81.442  -6.941  1.00 36.29           O  
ANISOU 2531  O   LEU B1127     3978   5703   4104   -524    381   -604
ATOM   2532  CB  LEU B1127     100.248  84.247  -5.298  1.00 35.44           C  
ANISOU 2532  CB  LEU B1127     3931   5585   3947   -484    316   -308
ATOM   2533  CG  LEU B1127     100.650  85.693  -5.607  1.00 41.37           C  
ANISOU 2533  CG  LEU B1127     4680   6450   4587   -504    316   -204
ATOM   2534  CD1 LEU B1127     101.547  86.240  -4.496  1.00 38.99           C  
ANISOU 2534  CD1 LEU B1127     4427   6056   4331   -452    254    -58
ATOM   2535  CD2 LEU B1127     101.361  85.787  -6.960  1.00 46.87           C  
ANISOU 2535  CD2 LEU B1127     5358   7328   5122   -539    310   -204
ATOM   2536  H   LEU B1127      97.805  84.939  -5.125  1.00  0.00           H  
ATOM   2537  N   MET B1128      98.429  81.701  -4.998  1.00 27.40           N  
ANISOU 2537  N   MET B1128     2867   4355   3187   -475    383   -548
ATOM   2538  CA  MET B1128      98.163  80.289  -4.763  1.00 31.65           C  
ANISOU 2538  CA  MET B1128     3403   4784   3838   -452    381   -609
ATOM   2539  C   MET B1128      97.329  79.648  -5.883  1.00 32.97           C  
ANISOU 2539  C   MET B1128     3507   4994   4026   -501    464   -768
ATOM   2540  O   MET B1128      97.670  78.569  -6.353  1.00 32.80           O  
ANISOU 2540  O   MET B1128     3481   4966   4013   -503    464   -827
ATOM   2541  CB  MET B1128      97.484  80.148  -3.401  1.00 31.02           C  
ANISOU 2541  CB  MET B1128     3327   4545   3911   -414    366   -566
ATOM   2542  CG  MET B1128      97.233  78.713  -2.942  1.00 37.29           C  
ANISOU 2542  CG  MET B1128     4121   5216   4830   -383    355   -592
ATOM   2543  SD  MET B1128      96.282  78.643  -1.402  1.00 42.83           S  
ANISOU 2543  SD  MET B1128     4817   5759   5697   -344    329   -527
ATOM   2544  CE  MET B1128      97.230  79.786  -0.391  1.00 31.29           C  
ANISOU 2544  CE  MET B1128     3418   4316   4153   -324    252   -393
ATOM   2545  H   MET B1128      98.076  82.365  -4.316  1.00  0.00           H  
ATOM   2546  N   ARG B1129      96.272  80.329  -6.332  1.00 31.31           N  
ANISOU 2546  N   ARG B1129     3243   4827   3826   -547    542   -847
ATOM   2547  CA  ARG B1129      95.422  79.831  -7.410  1.00 35.78           C  
ANISOU 2547  CA  ARG B1129     3742   5433   4417   -602    634  -1017
ATOM   2548  C   ARG B1129      96.146  79.691  -8.755  1.00 33.02           C  
ANISOU 2548  C   ARG B1129     3385   5254   3905   -652    638  -1083
ATOM   2549  O   ARG B1129      95.825  78.769  -9.504  1.00 36.33           O  
ANISOU 2549  O   ARG B1129     3764   5680   4358   -685    688  -1216
ATOM   2550  CB  ARG B1129      94.160  80.697  -7.550  1.00 38.59           C  
ANISOU 2550  CB  ARG B1129     4039   5808   4812   -645    725  -1091
ATOM   2551  CG  ARG B1129      93.194  80.566  -6.363  1.00 46.99           C  
ANISOU 2551  CG  ARG B1129     5083   6697   6074   -603    737  -1064
ATOM   2552  CD  ARG B1129      92.529  79.193  -6.253  1.00 50.55           C  
ANISOU 2552  CD  ARG B1129     5495   7007   6702   -584    770  -1143
ATOM   2553  NE  ARG B1129      91.555  78.943  -7.321  1.00 58.49           N  
ANISOU 2553  NE  ARG B1129     6419   8040   7762   -645    890  -1327
ATOM   2554  CZ  ARG B1129      90.260  78.661  -7.132  1.00 55.17           C  
ANISOU 2554  CZ  ARG B1129     5926   7501   7534   -646    971  -1406
ATOM   2555  NH1 ARG B1129      89.735  78.579  -5.910  1.00 47.30           N  
ANISOU 2555  NH1 ARG B1129     4923   6352   6695   -588    938  -1310
ATOM   2556  NH2 ARG B1129      89.478  78.449  -8.184  1.00 55.95           N1+
ANISOU 2556  NH2 ARG B1129     5951   7633   7674   -708   1088  -1588
ATOM   2557  H   ARG B1129      96.017  81.206  -5.882  1.00  0.00           H  
ATOM   2558  HE  ARG B1129      91.920  78.990  -8.264  1.00  0.00           H  
ATOM   2559 HH12 ARG B1129      88.761  78.378  -5.760  1.00  0.00           H  
ATOM   2560 HH11 ARG B1129      90.282  78.758  -5.067  1.00  0.00           H  
ATOM   2561 HH22 ARG B1129      88.498  78.236  -8.078  1.00  0.00           H  
ATOM   2562 HH21 ARG B1129      89.826  78.500  -9.129  1.00  0.00           H  
ATOM   2563  N   LYS B1130      97.142  80.542  -9.032  1.00 28.97           N  
ANISOU 2563  N   LYS B1130     2907   4875   3225   -658    584   -986
ATOM   2564  CA  LYS B1130      97.957  80.410 -10.244  1.00 33.94           C  
ANISOU 2564  CA  LYS B1130     3525   5674   3694   -702    571  -1027
ATOM   2565  C   LYS B1130      98.857  79.161 -10.248  1.00 35.54           C  
ANISOU 2565  C   LYS B1130     3753   5821   3930   -665    515  -1020
ATOM   2566  O   LYS B1130      99.322  78.750 -11.313  1.00 31.09           O  
ANISOU 2566  O   LYS B1130     3165   5374   3272   -704    513  -1086
ATOM   2567  CB  LYS B1130      98.826  81.651 -10.457  1.00 37.10           C  
ANISOU 2567  CB  LYS B1130     3949   6224   3920   -709    520   -897
ATOM   2568  CG  LYS B1130      98.026  82.936 -10.657  1.00 48.73           C  
ANISOU 2568  CG  LYS B1130     5395   7787   5333   -757    580   -904
ATOM   2569  CD  LYS B1130      98.838  84.010 -11.381  1.00 56.97           C  
ANISOU 2569  CD  LYS B1130     6441   9035   6170   -791    546   -810
ATOM   2570  CE  LYS B1130      98.373  85.437 -11.057  1.00 66.25           C  
ANISOU 2570  CE  LYS B1130     7614  10250   7307   -808    577   -732
ATOM   2571  NZ  LYS B1130      96.927  85.628 -11.278  1.00 64.55           N1+
ANISOU 2571  NZ  LYS B1130     7348  10036   7141   -864    689   -880
ATOM   2572  H   LYS B1130      97.369  81.282  -8.376  1.00  0.00           H  
ATOM   2573  HZ1 LYS B1130      96.391  85.176 -10.557  1.00  0.00           H  
ATOM   2574  HZ2 LYS B1130      96.709  86.610 -11.266  1.00  0.00           H  
ATOM   2575  HZ3 LYS B1130      96.652  85.255 -12.171  1.00  0.00           H  
ATOM   2576  N   CYS B1131      99.090  78.576  -9.069  1.00 36.43           N  
ANISOU 2576  N   CYS B1131     3909   5761   4170   -596    471   -940
ATOM   2577  CA  CYS B1131      99.787  77.305  -8.925  1.00 31.75           C  
ANISOU 2577  CA  CYS B1131     3339   5094   3628   -561    430   -934
ATOM   2578  C   CYS B1131      98.898  76.130  -9.366  1.00 35.79           C  
ANISOU 2578  C   CYS B1131     3801   5531   4264   -585    501  -1084
ATOM   2579  O   CYS B1131      99.422  75.066  -9.675  1.00 35.24           O  
ANISOU 2579  O   CYS B1131     3732   5436   4222   -579    489  -1119
ATOM   2580  CB  CYS B1131     100.244  77.071  -7.474  1.00 25.57           C  
ANISOU 2580  CB  CYS B1131     2620   4162   2932   -485    363   -798
ATOM   2581  SG  CYS B1131     101.465  78.302  -6.911  1.00 28.58           S  
ANISOU 2581  SG  CYS B1131     3059   4597   3202   -450    282   -624
ATOM   2582  H   CYS B1131      98.685  78.963  -8.224  1.00  0.00           H  
ATOM   2583  HG  CYS B1131     100.766  79.443  -7.002  1.00  0.00           H  
ATOM   2584  N   TRP B1132      97.577  76.336  -9.395  1.00 32.14           N  
ANISOU 2584  N   TRP B1132     3292   5026   3891   -612    580  -1171
ATOM   2585  CA  TRP B1132      96.599  75.275  -9.580  1.00 36.82           C  
ANISOU 2585  CA  TRP B1132     3831   5513   4644   -628    657  -1302
ATOM   2586  C   TRP B1132      95.762  75.427 -10.843  1.00 43.78           C  
ANISOU 2586  C   TRP B1132     4635   6494   5503   -712    760  -1489
ATOM   2587  O   TRP B1132      94.613  74.967 -10.873  1.00 37.80           O  
ANISOU 2587  O   TRP B1132     3821   5636   4903   -728    846  -1596
ATOM   2588  CB  TRP B1132      95.683  75.193  -8.370  1.00 34.79           C  
ANISOU 2588  CB  TRP B1132     3569   5083   4564   -583    671  -1253
ATOM   2589  CG  TRP B1132      96.347  74.958  -7.062  1.00 29.80           C  
ANISOU 2589  CG  TRP B1132     3007   4345   3970   -508    578  -1088
ATOM   2590  CD1 TRP B1132      97.474  74.246  -6.834  1.00 30.24           C  
ANISOU 2590  CD1 TRP B1132     3118   4385   3987   -472    506  -1011
ATOM   2591  CD2 TRP B1132      95.860  75.368  -5.766  1.00 30.41           C  
ANISOU 2591  CD2 TRP B1132     3101   4314   4137   -464    549   -986
ATOM   2592  NE1 TRP B1132      97.741  74.223  -5.485  1.00 30.44           N  
ANISOU 2592  NE1 TRP B1132     3194   4306   4063   -414    439   -877
ATOM   2593  CE2 TRP B1132      96.769  74.890  -4.778  1.00 26.02           C  
ANISOU 2593  CE2 TRP B1132     2615   3692   3577   -407    457   -854
ATOM   2594  CE3 TRP B1132      94.735  76.098  -5.331  1.00 31.30           C  
ANISOU 2594  CE3 TRP B1132     3176   4386   4329   -469    590   -994
ATOM   2595  CZ2 TRP B1132      96.564  75.124  -3.418  1.00 25.68           C  
ANISOU 2595  CZ2 TRP B1132     2601   3554   3602   -363    406   -743
ATOM   2596  CZ3 TRP B1132      94.528  76.348  -3.964  1.00 34.51           C  
ANISOU 2596  CZ3 TRP B1132     3609   4690   4812   -419    534   -872
ATOM   2597  CH2 TRP B1132      95.439  75.855  -3.014  1.00 29.28           C  
ANISOU 2597  CH2 TRP B1132     3015   3975   4135   -369    442   -751
ATOM   2598  H   TRP B1132      97.206  77.259  -9.199  1.00  0.00           H  
ATOM   2599  HE1 TRP B1132      98.541  73.726  -5.105  1.00  0.00           H  
ATOM   2600  N   GLU B1133      96.330  76.035 -11.887  1.00 42.54           N  
ANISOU 2600  N   GLU B1133     4471   6536   5155   -769    753  -1529
ATOM   2601  CA  GLU B1133      95.758  75.934 -13.225  1.00 48.51           C  
ANISOU 2601  CA  GLU B1133     5152   7414   5863   -862    846  -1726
ATOM   2602  C   GLU B1133      95.762  74.468 -13.663  1.00 53.05           C  
ANISOU 2602  C   GLU B1133     5693   7909   6552   -873    880  -1842
ATOM   2603  O   GLU B1133      96.769  73.787 -13.436  1.00 39.55           O  
ANISOU 2603  O   GLU B1133     4022   6170   4833   -833    806  -1765
ATOM   2604  CB  GLU B1133      96.561  76.782 -14.220  1.00 45.85           C  
ANISOU 2604  CB  GLU B1133     4817   7325   5277   -920    810  -1720
ATOM   2605  CG  GLU B1133      96.291  78.287 -14.092  1.00 71.88           C  
ANISOU 2605  CG  GLU B1133     8123  10730   8458   -938    816  -1652
ATOM   2606  CD  GLU B1133      94.878  78.677 -14.521  1.00 85.64           C  
ANISOU 2606  CD  GLU B1133     9799  12490  10248  -1007    942  -1816
ATOM   2607  OE1 GLU B1133      94.328  78.033 -15.438  1.00 67.46           O  
ANISOU 2607  OE1 GLU B1133     7433  10223   7975  -1075   1026  -2012
ATOM   2608  OE2 GLU B1133      94.333  79.630 -13.933  1.00 77.60           O1-
ANISOU 2608  OE2 GLU B1133     8789  11448   9248   -994    963  -1755
ATOM   2609  H   GLU B1133      97.257  76.421 -11.792  1.00  0.00           H  
ATOM   2610  N   PHE B1134      94.643  74.005 -14.241  1.00 39.87           N  
ANISOU 2610  N   PHE B1134     3947   6195   5003   -928    996  -2027
ATOM   2611  CA  PHE B1134      94.497  72.592 -14.602  1.00 49.86           C  
ANISOU 2611  CA  PHE B1134     5173   7356   6414   -937   1040  -2138
ATOM   2612  C   PHE B1134      95.611  72.154 -15.568  1.00 49.94           C  
ANISOU 2612  C   PHE B1134     5187   7513   6272   -975    991  -2173
ATOM   2613  O   PHE B1134      96.241  71.124 -15.341  1.00 40.98           O  
ANISOU 2613  O   PHE B1134     4071   6289   5209   -937    952  -2133
ATOM   2614  CB  PHE B1134      93.099  72.285 -15.181  1.00 51.04           C  
ANISOU 2614  CB  PHE B1134     5228   7441   6721  -1000   1187  -2352
ATOM   2615  CG  PHE B1134      92.815  70.802 -15.365  1.00 45.99           C  
ANISOU 2615  CG  PHE B1134     4546   6646   6281   -996   1238  -2441
ATOM   2616  CD1 PHE B1134      92.300  70.039 -14.297  1.00 45.40           C  
ANISOU 2616  CD1 PHE B1134     4471   6333   6445   -922   1249  -2361
ATOM   2617  CD2 PHE B1134      93.222  70.136 -16.540  1.00 49.08           C  
ANISOU 2617  CD2 PHE B1134     4895   7131   6621  -1067   1270  -2594
ATOM   2618  CE1 PHE B1134      92.133  68.668 -14.437  1.00 43.75           C  
ANISOU 2618  CE1 PHE B1134     4221   5977   6422   -916   1297  -2424
ATOM   2619  CE2 PHE B1134      93.057  68.763 -16.658  1.00 58.34           C  
ANISOU 2619  CE2 PHE B1134     6027   8152   7985  -1064   1320  -2671
ATOM   2620  CZ  PHE B1134      92.506  68.033 -15.614  1.00 48.04           C  
ANISOU 2620  CZ  PHE B1134     4724   6605   6923   -988   1336  -2581
ATOM   2621  H   PHE B1134      93.867  74.630 -14.415  1.00  0.00           H  
ATOM   2622  N   GLN B1135      95.867  72.983 -16.590  1.00 54.87           N  
ANISOU 2622  N   GLN B1135     5791   8369   6688  -1051    991  -2240
ATOM   2623  CA  GLN B1135      96.925  72.732 -17.559  1.00 50.70           C  
ANISOU 2623  CA  GLN B1135     5253   8009   6000  -1096    940  -2277
ATOM   2624  C   GLN B1135      98.297  73.214 -17.036  1.00 42.06           C  
ANISOU 2624  C   GLN B1135     4234   6981   4764  -1030    804  -2057
ATOM   2625  O   GLN B1135      98.394  74.374 -16.623  1.00 46.79           O  
ANISOU 2625  O   GLN B1135     4871   7637   5267  -1007    763  -1933
ATOM   2626  CB  GLN B1135      96.576  73.425 -18.890  1.00 61.34           C  
ANISOU 2626  CB  GLN B1135     6535   9594   7174  -1214    998  -2446
ATOM   2627  CG  GLN B1135      95.403  72.766 -19.647  1.00 66.58           C  
ANISOU 2627  CG  GLN B1135     7111  10218   7968  -1297   1140  -2705
ATOM   2628  CD  GLN B1135      95.666  71.323 -20.084  1.00 73.58           C  
ANISOU 2628  CD  GLN B1135     7962  11028   8964  -1310   1154  -2807
ATOM   2629  OE1 GLN B1135      94.792  70.466 -19.974  1.00 78.04           O  
ANISOU 2629  OE1 GLN B1135     8538  11705   9406  -1317   1071  -2767
ATOM   2630  NE2 GLN B1135      96.861  71.032 -20.575  1.00 69.88           N  
ANISOU 2630  NE2 GLN B1135     7446  10362   8741  -1312   1260  -2933
ATOM   2631  H   GLN B1135      95.372  73.861 -16.657  1.00  0.00           H  
ATOM   2632 HE22 GLN B1135      97.068  70.091 -20.875  1.00  0.00           H  
ATOM   2633 HE21 GLN B1135      97.567  71.745 -20.680  1.00  0.00           H  
ATOM   2634  N   PRO B1136      99.332  72.345 -17.108  1.00 43.69           N  
ANISOU 2634  N   PRO B1136     4457   7174   4969  -1002    739  -2012
ATOM   2635  CA  PRO B1136     100.707  72.676 -16.692  1.00 49.32           C  
ANISOU 2635  CA  PRO B1136     5232   7934   5572   -939    617  -1814
ATOM   2636  C   PRO B1136     101.312  73.929 -17.332  1.00 52.54           C  
ANISOU 2636  C   PRO B1136     5637   8579   5746   -976    561  -1751
ATOM   2637  O   PRO B1136     101.957  74.715 -16.640  1.00 49.92           O  
ANISOU 2637  O   PRO B1136     5359   8255   5352   -918    486  -1567
ATOM   2638  CB  PRO B1136     101.537  71.457 -17.109  1.00 46.82           C  
ANISOU 2638  CB  PRO B1136     4901   7599   5290   -937    590  -1850
ATOM   2639  CG  PRO B1136     100.567  70.321 -17.309  1.00 43.97           C  
ANISOU 2639  CG  PRO B1136     4491   7101   5113   -968    691  -2019
ATOM   2640  CD  PRO B1136      99.221  70.957 -17.553  1.00 51.92           C  
ANISOU 2640  CD  PRO B1136     5455   8122   6148  -1024    789  -2146
ATOM   2641  N   SER B1137     101.114  74.097 -18.646  1.00 50.47           N  
ANISOU 2641  N   SER B1137     5306   8512   5357  -1075    597  -1899
ATOM   2642  CA  SER B1137     101.662  75.228 -19.395  1.00 60.11           C  
ANISOU 2642  CA  SER B1137     6513   9985   6340  -1121    543  -1837
ATOM   2643  C   SER B1137     101.049  76.581 -18.988  1.00 48.69           C  
ANISOU 2643  C   SER B1137     5088   8581   4829  -1124    566  -1768
ATOM   2644  O   SER B1137     101.649  77.622 -19.258  1.00 55.94           O  
ANISOU 2644  O   SER B1137     6014   9671   5570  -1134    507  -1648
ATOM   2645  CB  SER B1137     101.508  74.964 -20.904  1.00 63.94           C  
ANISOU 2645  CB  SER B1137     6913  10683   6696  -1239    579  -2030
ATOM   2646  OG  SER B1137     100.151  74.705 -21.245  1.00 58.04           O  
ANISOU 2646  OG  SER B1137     6119   9895   6037  -1309    707  -2246
ATOM   2647  H   SER B1137     100.565  73.437 -19.179  1.00  0.00           H  
ATOM   2648  HG  SER B1137      99.991  75.075 -22.125  1.00  0.00           H  
ATOM   2649  N   ASN B1138      99.869  76.553 -18.355  1.00 53.17           N  
ANISOU 2649  N   ASN B1138     5660   8992   5548  -1116    654  -1839
ATOM   2650  CA  ASN B1138      99.166  77.743 -17.872  1.00 47.48           C  
ANISOU 2650  CA  ASN B1138     4959   8279   4802  -1113    685  -1777
ATOM   2651  C   ASN B1138      99.514  78.104 -16.426  1.00 48.12           C  
ANISOU 2651  C   ASN B1138     5117   8190   4976  -1005    625  -1571
ATOM   2652  O   ASN B1138      99.086  79.168 -15.978  1.00 39.23           O  
ANISOU 2652  O   ASN B1138     4006   7063   3833   -999    644  -1506
ATOM   2653  CB  ASN B1138      97.640  77.548 -17.996  1.00 61.77           C  
ANISOU 2653  CB  ASN B1138     6720  10014   6734  -1165    819  -1969
ATOM   2654  CG  ASN B1138      97.103  77.474 -19.425  1.00 67.97           C  
ANISOU 2654  CG  ASN B1138     7425  10993   7406  -1290    897  -2190
ATOM   2655  OD1 ASN B1138      95.938  77.142 -19.629  1.00 58.49           O  
ANISOU 2655  OD1 ASN B1138     6205  10015   6002  -1345    846  -2188
ATOM   2656  ND2 ASN B1138      97.915  77.775 -20.429  1.00 79.61           N  
ANISOU 2656  ND2 ASN B1138     8847  12383   9016  -1337   1023  -2384
ATOM   2657  H   ASN B1138      99.420  75.659 -18.194  1.00  0.00           H  
ATOM   2658 HD22 ASN B1138      97.592  77.724 -21.381  1.00  0.00           H  
ATOM   2659 HD21 ASN B1138      98.877  78.028 -20.251  1.00  0.00           H  
ATOM   2660  N   ARG B1139     100.262  77.260 -15.706  1.00 43.07           N  
ANISOU 2660  N   ARG B1139     4520   7411   4432   -927    558  -1477
ATOM   2661  CA  ARG B1139     100.672  77.573 -14.336  1.00 44.75           C  
ANISOU 2661  CA  ARG B1139     4804   7468   4728   -832    500  -1294
ATOM   2662  C   ARG B1139     101.759  78.641 -14.312  1.00 36.75           C  
ANISOU 2662  C   ARG B1139     3825   6570   3567   -806    413  -1113
ATOM   2663  O   ARG B1139     102.568  78.740 -15.238  1.00 35.36           O  
ANISOU 2663  O   ARG B1139     3626   6560   3248   -835    367  -1094
ATOM   2664  CB  ARG B1139     101.181  76.320 -13.616  1.00 47.77           C  
ANISOU 2664  CB  ARG B1139     5222   7669   5259   -763    464  -1262
ATOM   2665  CG  ARG B1139     100.035  75.458 -13.102  1.00 41.47           C  
ANISOU 2665  CG  ARG B1139     4411   6683   4661   -752    537  -1357
ATOM   2666  CD  ARG B1139     100.524  74.086 -12.673  1.00 39.89           C  
ANISOU 2666  CD  ARG B1139     4230   6342   4582   -706    513  -1349
ATOM   2667  NE  ARG B1139      99.502  73.084 -12.967  1.00 40.24           N  
ANISOU 2667  NE  ARG B1139     4221   6292   4773   -738    603  -1509
ATOM   2668  CZ  ARG B1139      99.748  71.787 -13.146  1.00 41.78           C  
ANISOU 2668  CZ  ARG B1139     4404   6408   5060   -732    612  -1562
ATOM   2669  NH1 ARG B1139     100.977  71.308 -13.003  1.00 43.21           N  
ANISOU 2669  NH1 ARG B1139     4625   6596   5197   -694    536  -1471
ATOM   2670  NH2 ARG B1139      98.759  70.979 -13.489  1.00 42.55           N1+
ANISOU 2670  NH2 ARG B1139     4445   6414   5306   -764    703  -1706
ATOM   2671  H   ARG B1139     100.657  76.435 -16.143  1.00  0.00           H  
ATOM   2672  HE  ARG B1139      98.543  73.426 -13.075  1.00  0.00           H  
ATOM   2673 HH12 ARG B1139     101.168  70.309 -13.246  1.00  0.00           H  
ATOM   2674 HH11 ARG B1139     101.750  71.892 -12.715  1.00  0.00           H  
ATOM   2675 HH22 ARG B1139      98.949  69.976 -13.696  1.00  0.00           H  
ATOM   2676 HH21 ARG B1139      97.816  71.305 -13.637  1.00  0.00           H  
ATOM   2677  N   THR B1140     101.790  79.383 -13.206  1.00 35.53           N  
ANISOU 2677  N   THR B1140     3720   6317   3461   -748    388   -975
ATOM   2678  CA  THR B1140     102.894  80.280 -12.902  1.00 32.66           C  
ANISOU 2678  CA  THR B1140     3391   6016   3001   -710    308   -789
ATOM   2679  C   THR B1140     104.228  79.503 -12.737  1.00 35.92           C  
ANISOU 2679  C   THR B1140     3831   6383   3433   -654    230   -709
ATOM   2680  O   THR B1140     104.233  78.275 -12.631  1.00 34.21           O  
ANISOU 2680  O   THR B1140     3616   6065   3315   -639    237   -787
ATOM   2681  CB  THR B1140     102.577  81.082 -11.615  1.00 36.01           C  
ANISOU 2681  CB  THR B1140     3862   6316   3504   -660    305   -673
ATOM   2682  OG1 THR B1140     103.510  82.112 -11.381  1.00 37.17           O  
ANISOU 2682  OG1 THR B1140     4031   6530   3559   -633    240   -498
ATOM   2683  CG2 THR B1140     102.554  80.212 -10.352  1.00 31.51           C  
ANISOU 2683  CG2 THR B1140     3338   5519   3114   -590    289   -654
ATOM   2684  H   THR B1140     101.089  79.242 -12.486  1.00  0.00           H  
ATOM   2685  HG1 THR B1140     103.259  82.913 -11.866  1.00  0.00           H  
ATOM   2686  N   SER B1141     105.339  80.229 -12.731  1.00 32.81           N  
ANISOU 2686  N   SER B1141     3452   6059   2954   -625    160   -551
ATOM   2687  CA  SER B1141     106.652  79.692 -12.432  1.00 36.85           C  
ANISOU 2687  CA  SER B1141     3987   6524   3491   -566     88   -457
ATOM   2688  C   SER B1141     107.064  80.048 -11.001  1.00 28.28           C  
ANISOU 2688  C   SER B1141     2964   5275   2504   -489     55   -316
ATOM   2689  O   SER B1141     106.490  80.953 -10.391  1.00 28.01           O  
ANISOU 2689  O   SER B1141     2949   5205   2488   -486     76   -269
ATOM   2690  CB  SER B1141     107.633  80.318 -13.432  1.00 31.91           C  
ANISOU 2690  CB  SER B1141     3320   6092   2709   -586     32   -368
ATOM   2691  OG  SER B1141     107.850  81.697 -13.155  1.00 33.69           O  
ANISOU 2691  OG  SER B1141     3559   6360   2882   -571     13   -217
ATOM   2692  H   SER B1141     105.279  81.237 -12.767  1.00  0.00           H  
ATOM   2693  HG  SER B1141     108.672  81.962 -13.581  1.00  0.00           H  
ATOM   2694  N   PHE B1142     108.145  79.417 -10.535  1.00 31.24           N  
ANISOU 2694  N   PHE B1142     3366   5566   2937   -433      6   -251
ATOM   2695  CA  PHE B1142     108.767  79.787  -9.270  1.00 28.25           C  
ANISOU 2695  CA  PHE B1142     3044   5044   2645   -366    -23   -127
ATOM   2696  C   PHE B1142     109.333  81.209  -9.263  1.00 32.86           C  
ANISOU 2696  C   PHE B1142     3622   5702   3161   -355    -52     23
ATOM   2697  O   PHE B1142     109.148  81.916  -8.279  1.00 26.15           O  
ANISOU 2697  O   PHE B1142     2807   4759   2370   -329    -48     96
ATOM   2698  CB  PHE B1142     109.826  78.760  -8.854  1.00 25.40           C  
ANISOU 2698  CB  PHE B1142     2708   4586   2357   -315    -58   -108
ATOM   2699  CG  PHE B1142     109.229  77.475  -8.326  1.00 23.18           C  
ANISOU 2699  CG  PHE B1142     2452   4177   2179   -311    -27   -218
ATOM   2700  CD1 PHE B1142     108.406  77.509  -7.185  1.00 27.92           C  
ANISOU 2700  CD1 PHE B1142     3093   4642   2872   -295     -3   -225
ATOM   2701  CD2 PHE B1142     109.464  76.245  -8.969  1.00 25.59           C  
ANISOU 2701  CD2 PHE B1142     2733   4494   2493   -323    -22   -305
ATOM   2702  CE1 PHE B1142     107.839  76.344  -6.702  1.00 24.88           C  
ANISOU 2702  CE1 PHE B1142     2726   4143   2583   -290     21   -306
ATOM   2703  CE2 PHE B1142     108.885  75.086  -8.469  1.00 25.73           C  
ANISOU 2703  CE2 PHE B1142     2771   4389   2613   -318     10   -390
ATOM   2704  CZ  PHE B1142     108.080  75.135  -7.338  1.00 25.56           C  
ANISOU 2704  CZ  PHE B1142     2792   4239   2681   -300     30   -384
ATOM   2705  H   PHE B1142     108.597  78.698 -11.080  1.00  0.00           H  
ATOM   2706  N   GLN B1143     109.946  81.642 -10.373  1.00 28.37           N  
ANISOU 2706  N   GLN B1143     3004   5305   2470   -380    -82     74
ATOM   2707  CA  GLN B1143     110.421  83.020 -10.501  1.00 31.19           C  
ANISOU 2707  CA  GLN B1143     3346   5743   2761   -372   -108    234
ATOM   2708  C   GLN B1143     109.307  84.064 -10.373  1.00 21.76           C  
ANISOU 2708  C   GLN B1143     2154   4583   1530   -413    -59    228
ATOM   2709  O   GLN B1143     109.500  85.094  -9.730  1.00 33.01           O  
ANISOU 2709  O   GLN B1143     3596   5963   2982   -389    -62    353
ATOM   2710  CB  GLN B1143     111.215  83.217 -11.811  1.00 38.38           C  
ANISOU 2710  CB  GLN B1143     4193   6855   3535   -397   -154    295
ATOM   2711  CG  GLN B1143     112.732  83.031 -11.649  1.00 40.32           C  
ANISOU 2711  CG  GLN B1143     4431   7057   3831   -332   -216    420
ATOM   2712  CD  GLN B1143     113.327  84.010 -10.636  1.00 69.89           C  
ANISOU 2712  CD  GLN B1143     8208  10679   7668   -273   -227    581
ATOM   2713  OE1 GLN B1143     113.006  85.197 -10.642  1.00 83.10           O  
ANISOU 2713  OE1 GLN B1143     9911  12198   9463   -212   -241    617
ATOM   2714  NE2 GLN B1143     114.179  83.527  -9.750  1.00 74.02           N  
ANISOU 2714  NE2 GLN B1143     8722  11265   8135   -294   -213    671
ATOM   2715  H   GLN B1143     110.048  81.025 -11.165  1.00  0.00           H  
ATOM   2716 HE22 GLN B1143     114.576  84.137  -9.053  1.00  0.00           H  
ATOM   2717 HE21 GLN B1143     114.427  82.540  -9.758  1.00  0.00           H  
ATOM   2718  N   ASN B1144     108.147  83.764 -10.962  1.00 25.06           N  
ANISOU 2718  N   ASN B1144     2550   5069   1901   -475     -6     78
ATOM   2719  CA  ASN B1144     107.012  84.671 -10.916  1.00 28.90           C  
ANISOU 2719  CA  ASN B1144     3030   5598   2352   -520     50     55
ATOM   2720  C   ASN B1144     106.399  84.744  -9.512  1.00 31.69           C  
ANISOU 2720  C   ASN B1144     3433   5747   2859   -481     76     54
ATOM   2721  O   ASN B1144     106.045  85.833  -9.059  1.00 28.49           O  
ANISOU 2721  O   ASN B1144     3036   5325   2462   -483     97    126
ATOM   2722  CB  ASN B1144     105.951  84.248 -11.934  1.00 29.48           C  
ANISOU 2722  CB  ASN B1144     3060   5787   2352   -599    109   -123
ATOM   2723  CG  ASN B1144     104.885  85.319 -12.168  1.00 34.74           C  
ANISOU 2723  CG  ASN B1144     3705   6544   2947   -658    172   -143
ATOM   2724  OD1 ASN B1144     103.699  85.008 -12.256  1.00 42.63           O  
ANISOU 2724  OD1 ASN B1144     4690   7525   3980   -700    244   -294
ATOM   2725  ND2 ASN B1144     105.291  86.580 -12.276  1.00 30.34           N  
ANISOU 2725  ND2 ASN B1144     3142   6082   2302   -660    151     11
ATOM   2726  H   ASN B1144     108.019  82.870 -11.429  1.00  0.00           H  
ATOM   2727 HD22 ASN B1144     104.635  87.333 -12.413  1.00  0.00           H  
ATOM   2728 HD21 ASN B1144     106.271  86.817 -12.182  1.00  0.00           H  
ATOM   2729  N   LEU B1145     106.326  83.596  -8.830  1.00 26.52           N  
ANISOU 2729  N   LEU B1145     2808   4942   2322   -447     74    -22
ATOM   2730  CA  LEU B1145     105.917  83.542  -7.428  1.00 26.14           C  
ANISOU 2730  CA  LEU B1145     2808   4706   2418   -407     83     -9
ATOM   2731  C   LEU B1145     106.830  84.376  -6.527  1.00 25.07           C  
ANISOU 2731  C   LEU B1145     2704   4501   2318   -358     41    151
ATOM   2732  O   LEU B1145     106.326  85.142  -5.709  1.00 30.68           O  
ANISOU 2732  O   LEU B1145     3432   5137   3087   -351     58    194
ATOM   2733  CB  LEU B1145     105.876  82.094  -6.924  1.00 23.98           C  
ANISOU 2733  CB  LEU B1145     2559   4300   2250   -378     77    -95
ATOM   2734  CG  LEU B1145     104.705  81.288  -7.494  1.00 28.03           C  
ANISOU 2734  CG  LEU B1145     3039   4826   2782   -422    134   -259
ATOM   2735  CD1 LEU B1145     104.948  79.790  -7.316  1.00 24.40           C  
ANISOU 2735  CD1 LEU B1145     2594   4274   2402   -398    122   -325
ATOM   2736  CD2 LEU B1145     103.381  81.723  -6.853  1.00 27.28           C  
ANISOU 2736  CD2 LEU B1145     2940   4661   2764   -436    185   -299
ATOM   2737  H   LEU B1145     106.573  82.721  -9.285  1.00  0.00           H  
ATOM   2738  N   ILE B1146     108.149  84.267  -6.731  1.00 29.53           N  
ANISOU 2738  N   ILE B1146     3272   5085   2861   -324     -8    236
ATOM   2739  CA  ILE B1146     109.117  85.046  -5.971  1.00 26.82           C  
ANISOU 2739  CA  ILE B1146     2953   4665   2572   -277    -40    383
ATOM   2740  C   ILE B1146     108.878  86.557  -6.150  1.00 33.90           C  
ANISOU 2740  C   ILE B1146     3826   5641   3412   -301    -22    485
ATOM   2741  O   ILE B1146     108.769  87.261  -5.148  1.00 30.38           O  
ANISOU 2741  O   ILE B1146     3404   5093   3046   -283    -12    550
ATOM   2742  CB  ILE B1146     110.586  84.705  -6.328  1.00 25.04           C  
ANISOU 2742  CB  ILE B1146     2718   4461   2334   -239    -90    461
ATOM   2743  CG1 ILE B1146     110.926  83.253  -5.954  1.00 30.88           C  
ANISOU 2743  CG1 ILE B1146     3485   5104   3143   -212   -103    372
ATOM   2744  CG2 ILE B1146     111.592  85.639  -5.639  1.00 35.53           C  
ANISOU 2744  CG2 ILE B1146     4057   5712   3727   -194   -111    616
ATOM   2745  CD1 ILE B1146     112.184  82.733  -6.650  1.00 30.52           C  
ANISOU 2745  CD1 ILE B1146     3413   5113   3067   -188   -143    415
ATOM   2746  H   ILE B1146     108.501  83.626  -7.438  1.00  0.00           H  
ATOM   2747  N   GLU B1147     108.727  87.013  -7.403  1.00 35.02           N  
ANISOU 2747  N   GLU B1147     3920   5970   3413   -347    -15    497
ATOM   2748  CA  GLU B1147     108.364  88.401  -7.687  1.00 36.71           C  
ANISOU 2748  CA  GLU B1147     4110   6280   3558   -380     10    590
ATOM   2749  C   GLU B1147     107.061  88.845  -6.998  1.00 29.63           C  
ANISOU 2749  C   GLU B1147     3229   5311   2718   -406     69    524
ATOM   2750  O   GLU B1147     107.030  89.921  -6.402  1.00 36.72           O  
ANISOU 2750  O   GLU B1147     4132   6162   3655   -399     83    623
ATOM   2751  CB  GLU B1147     108.253  88.647  -9.197  1.00 41.61           C  
ANISOU 2751  CB  GLU B1147     4674   7136   3996   -441     13    585
ATOM   2752  CG  GLU B1147     109.607  88.609  -9.920  1.00 62.42           C  
ANISOU 2752  CG  GLU B1147     7280   9869   6567   -418    -51    703
ATOM   2753  CD  GLU B1147     109.507  88.956 -11.403  1.00 82.84           C  
ANISOU 2753  CD  GLU B1147     9805  12712   8956   -485    -57    711
ATOM   2754  OE1 GLU B1147     108.402  89.278 -11.885  1.00 52.80           O  
ANISOU 2754  OE1 GLU B1147     5984   9016   5060   -554     -2    620
ATOM   2755  OE2 GLU B1147     110.556  88.925 -12.075  1.00 79.05           O1-
ANISOU 2755  OE2 GLU B1147     9289  12331   8414   -470   -117    808
ATOM   2756  H   GLU B1147     108.846  86.378  -8.187  1.00  0.00           H  
ATOM   2757  N   GLY B1148     106.021  88.005  -7.077  1.00 32.64           N  
ANISOU 2757  N   GLY B1148     3608   5679   3113   -435    105    359
ATOM   2758  CA  GLY B1148     104.711  88.273  -6.491  1.00 31.17           C  
ANISOU 2758  CA  GLY B1148     3425   5421   2996   -457    162    285
ATOM   2759  C   GLY B1148     104.771  88.394  -4.963  1.00 33.18           C  
ANISOU 2759  C   GLY B1148     3723   5480   3405   -408    147    330
ATOM   2760  O   GLY B1148     104.163  89.306  -4.407  1.00 35.84           O  
ANISOU 2760  O   GLY B1148     4055   5776   3785   -421    180    358
ATOM   2761  H   GLY B1148     106.127  87.141  -7.604  1.00  0.00           H  
ATOM   2762  N   PHE B1149     105.524  87.524  -4.282  1.00 27.94           N  
ANISOU 2762  N   PHE B1149     3096   4699   2820   -358    100    332
ATOM   2763  CA  PHE B1149     105.685  87.597  -2.829  1.00 29.30           C  
ANISOU 2763  CA  PHE B1149     3307   4699   3125   -318     81    369
ATOM   2764  C   PHE B1149     106.541  88.783  -2.393  1.00 29.38           C  
ANISOU 2764  C   PHE B1149     3323   4686   3153   -299     66    520
ATOM   2765  O   PHE B1149     106.169  89.481  -1.453  1.00 29.84           O  
ANISOU 2765  O   PHE B1149     3391   4656   3290   -298     81    552
ATOM   2766  CB  PHE B1149     106.277  86.304  -2.261  1.00 25.51           C  
ANISOU 2766  CB  PHE B1149     2865   4114   2711   -277     40    327
ATOM   2767  CG  PHE B1149     105.396  85.087  -2.424  1.00 21.60           C  
ANISOU 2767  CG  PHE B1149     2367   3603   2237   -291     56    190
ATOM   2768  CD1 PHE B1149     104.034  85.130  -2.062  1.00 31.24           C  
ANISOU 2768  CD1 PHE B1149     3571   4788   3511   -315     95    117
ATOM   2769  CD2 PHE B1149     105.951  83.873  -2.868  1.00 22.55           C  
ANISOU 2769  CD2 PHE B1149     2493   3734   2339   -277     36    140
ATOM   2770  CE1 PHE B1149     103.240  84.007  -2.225  1.00 32.26           C  
ANISOU 2770  CE1 PHE B1149     3688   4891   3679   -324    115      1
ATOM   2771  CE2 PHE B1149     105.142  82.759  -3.018  1.00 27.70           C  
ANISOU 2771  CE2 PHE B1149     3138   4361   3025   -289     56     22
ATOM   2772  CZ  PHE B1149     103.791  82.829  -2.708  1.00 25.15           C  
ANISOU 2772  CZ  PHE B1149     2796   3998   2761   -312     97    -44
ATOM   2773  H   PHE B1149     105.989  86.762  -4.774  1.00  0.00           H  
ATOM   2774  N   GLU B1150     107.652  89.024  -3.100  1.00 33.79           N  
ANISOU 2774  N   GLU B1150     3869   5323   3645   -285     40    614
ATOM   2775  CA  GLU B1150     108.534  90.155  -2.826  1.00 43.67           C  
ANISOU 2775  CA  GLU B1150     5117   6549   4926   -263     30    770
ATOM   2776  C   GLU B1150     107.819  91.504  -2.959  1.00 36.02           C  
ANISOU 2776  C   GLU B1150     4120   5638   3925   -302     74    834
ATOM   2777  O   GLU B1150     108.087  92.409  -2.175  1.00 37.49           O  
ANISOU 2777  O   GLU B1150     4310   5741   4192   -288     82    933
ATOM   2778  CB  GLU B1150     109.769  90.110  -3.732  1.00 45.28           C  
ANISOU 2778  CB  GLU B1150     5297   6846   5061   -242     -6    866
ATOM   2779  CG  GLU B1150     110.780  89.034  -3.297  1.00 44.72           C  
ANISOU 2779  CG  GLU B1150     5253   6675   5062   -192    -46    843
ATOM   2780  CD  GLU B1150     112.039  88.988  -4.161  1.00 61.46           C  
ANISOU 2780  CD  GLU B1150     7340   8876   7133   -166    -83    942
ATOM   2781  OE1 GLU B1150     112.083  89.649  -5.220  1.00 52.36           O  
ANISOU 2781  OE1 GLU B1150     6141   7885   5867   -192    -87   1021
ATOM   2782  OE2 GLU B1150     112.999  88.312  -3.736  1.00 61.94           O1-
ANISOU 2782  OE2 GLU B1150     7418   8845   7269   -122   -109    940
ATOM   2783  H   GLU B1150     107.900  88.421  -3.881  1.00  0.00           H  
ATOM   2784  N   ALA B1151     106.879  91.599  -3.904  1.00 35.07           N  
ANISOU 2784  N   ALA B1151     3970   5661   3694   -354    110    770
ATOM   2785  CA  ALA B1151     106.035  92.771  -4.083  1.00 44.94           C  
ANISOU 2785  CA  ALA B1151     5192   6982   4901   -400    164    807
ATOM   2786  C   ALA B1151     105.087  93.002  -2.899  1.00 46.59           C  
ANISOU 2786  C   ALA B1151     5416   7048   5237   -403    196    748
ATOM   2787  O   ALA B1151     104.902  94.147  -2.490  1.00 54.90           O  
ANISOU 2787  O   ALA B1151     6457   8075   6325   -416    227    828
ATOM   2788  CB  ALA B1151     105.240  92.628  -5.379  1.00 44.49           C  
ANISOU 2788  CB  ALA B1151     5097   7113   4691   -461    200    721
ATOM   2789  H   ALA B1151     106.713  90.807  -4.517  1.00  0.00           H  
ATOM   2790  N   LEU B1152     104.528  91.918  -2.347  1.00 43.28           N  
ANISOU 2790  N   LEU B1152     5018   6537   4888   -391    188    616
ATOM   2791  CA  LEU B1152     103.664  91.983  -1.168  1.00 40.00           C  
ANISOU 2791  CA  LEU B1152     4611   5990   4597   -392    206    561
ATOM   2792  C   LEU B1152     104.435  92.341   0.106  1.00 40.58           C  
ANISOU 2792  C   LEU B1152     4715   5914   4789   -353    172    643
ATOM   2793  O   LEU B1152     103.861  92.938   1.018  1.00 45.29           O  
ANISOU 2793  O   LEU B1152     5307   6423   5476   -362    190    647
ATOM   2794  CB  LEU B1152     102.908  90.653  -0.980  1.00 36.13           C  
ANISOU 2794  CB  LEU B1152     4128   5449   4150   -388    202    414
ATOM   2795  CG  LEU B1152     101.887  90.357  -2.089  1.00 39.77           C  
ANISOU 2795  CG  LEU B1152     4549   6031   4530   -434    255    304
ATOM   2796  CD1 LEU B1152     101.308  88.951  -1.932  1.00 39.38           C  
ANISOU 2796  CD1 LEU B1152     4504   5916   4542   -423    248    174
ATOM   2797  CD2 LEU B1152     100.763  91.391  -2.110  1.00 45.24           C  
ANISOU 2797  CD2 LEU B1152     5203   6757   5229   -479    323    293
ATOM   2798  H   LEU B1152     104.732  90.999  -2.723  1.00  0.00           H  
ATOM   2799  N   LEU B1153     105.720  91.979   0.148  1.00 36.85           N  
ANISOU 2799  N   LEU B1153     4268   5413   4320   -314    127    701
ATOM   2800  CA  LEU B1153     106.586  92.243   1.286  1.00 40.22           C  
ANISOU 2800  CA  LEU B1153     4721   5696   4861   -281    100    763
ATOM   2801  C   LEU B1153     107.042  93.700   1.371  1.00 51.51           C  
ANISOU 2801  C   LEU B1153     6130   7122   6318   -286    125    905
ATOM   2802  O   LEU B1153     107.258  94.191   2.483  1.00 48.29           O  
ANISOU 2802  O   LEU B1153     5731   6587   6027   -277    127    935
ATOM   2803  CB  LEU B1153     107.803  91.305   1.249  1.00 35.93           C  
ANISOU 2803  CB  LEU B1153     4207   5120   4323   -238     54    766
ATOM   2804  CG  LEU B1153     107.481  89.856   1.645  1.00 31.02           C  
ANISOU 2804  CG  LEU B1153     3616   4450   3718   -227     27    638
ATOM   2805  CD1 LEU B1153     108.650  88.922   1.319  1.00 31.49           C  
ANISOU 2805  CD1 LEU B1153     3695   4510   3757   -191     -7    642
ATOM   2806  CD2 LEU B1153     107.135  89.786   3.132  1.00 26.38           C  
ANISOU 2806  CD2 LEU B1153     3053   3723   3245   -226     18    598
ATOM   2807  H   LEU B1153     106.114  91.474  -0.638  1.00  0.00           H  
ATOM   2808  N   LYS B1154     107.181  94.367   0.219  1.00 59.13           N  
ANISOU 2808  N   LYS B1154     7062   8227   7176   -303    145    992
ATOM   2809  CA  LYS B1154     107.598  95.773   0.142  1.00 65.83           C  
ANISOU 2809  CA  LYS B1154     7883   9086   8041   -309    172   1148
ATOM   2810  C   LYS B1154     106.407  96.708   0.352  1.00 79.29           C  
ANISOU 2810  C   LYS B1154     9564  10805   9755   -356    229   1144
ATOM   2811  O   LYS B1154     105.230  96.344   0.446  1.00 84.28           O  
ANISOU 2811  O   LYS B1154    10195  11453  10374   -384    249   1019
ATOM   2812  CB  LYS B1154     108.265  96.053  -1.217  1.00 75.33           C  
ANISOU 2812  CB  LYS B1154     9056  10450   9114   -310    163   1262
ATOM   2813  CG  LYS B1154     109.604  95.319  -1.400  1.00 94.44           C  
ANISOU 2813  CG  LYS B1154    11487  12848  11546   -259    109   1298
ATOM   2814  CD  LYS B1154     110.515  95.980  -2.436  1.00104.00           C  
ANISOU 2814  CD  LYS B1154    12655  14179  12679   -251     96   1470
ATOM   2815  CE  LYS B1154     111.200  97.232  -1.867  1.00113.96           C  
ANISOU 2815  CE  LYS B1154    13898  15343  14058   -231    117   1639
ATOM   2816  NZ  LYS B1154     112.189  97.790  -2.799  1.00 98.33           N1+
ANISOU 2816  NZ  LYS B1154    11870  13465  12024   -212     96   1827
ATOM   2817  H   LYS B1154     107.010  93.885  -0.656  1.00  0.00           H  
ATOM   2818  HZ1 LYS B1154     112.619  98.602  -2.390  1.00  0.00           H  
ATOM   2819  HZ2 LYS B1154     112.907  97.116  -2.995  1.00  0.00           H  
ATOM   2820  HZ3 LYS B1154     111.750  98.062  -3.660  1.00  0.00           H  
TER    2821      LYS B1154
HETATM 2822  O   HOH B1303     114.222  63.917   5.317  1.00 22.09           O  
HETATM 2823  H1  HOH B1303     114.043  63.340   4.504  1.00  0.00           H  
HETATM 2824  H2  HOH B1303     114.625  64.787   5.008  1.00  0.00           H  
HETATM 2825  O   HOH B1305     112.188  66.010  15.381  1.00 20.46           O  
HETATM 2826  H1  HOH B1305     112.553  66.208  14.467  1.00  0.00           H  
HETATM 2827  H2  HOH B1305     111.219  66.270  15.403  1.00  0.00           H  
HETATM 2828  O   HOH B1312     110.950  62.702  -0.833  1.00 28.17           O  
HETATM 2829  H1  HOH B1312     110.029  62.877  -0.456  1.00  0.00           H  
HETATM 2830  H2  HOH B1312     111.619  62.690  -0.070  1.00  0.00           H  
HETATM 2831  C10 MI1 A   1     114.473  66.093  10.242  1.00 42.40           C  
HETATM 2832  C15 MI1 A   1     115.606  66.177   9.406  1.00 44.15           C  
HETATM 2833  C16 MI1 A   1     116.017  65.738   8.097  1.00 41.09           C  
HETATM 2834  C11 MI1 A   1     117.310  66.195   7.909  1.00 41.46           C  
HETATM 2835  N12 MI1 A   1     117.710  66.884   9.032  1.00 40.24           N  
HETATM 2836  C14 MI1 A   1     116.705  66.888   9.964  1.00 35.36           C  
HETATM 2837  N17 MI1 A   1     116.758  67.453  11.174  1.00 36.03           N  
HETATM 2838  C18 MI1 A   1     115.605  67.309  11.874  1.00 34.21           C  
HETATM 2839  N19 MI1 A   1     114.476  66.675  11.476  1.00 36.14           N  
HETATM 2840  C1  MI1 A   1     113.213  65.361   9.894  1.00  0.00           C  
HETATM 2841  C2  MI1 A   1     112.899  64.586   8.777  1.00  0.00           C  
HETATM 2842  C3  MI1 A   1     112.043  65.269  10.668  1.00  0.00           C  
HETATM 2843 HN12 MI1 A   1     118.642  67.293   9.149  1.00  0.00           H  
HETATM 2844  H16 MI1 A   1     115.340  65.165   7.482  1.00  0.00           H  
HETATM 2845  H11 MI1 A   1     117.828  65.985   6.985  1.00  0.00           H  
HETATM 2846  H18 MI1 A   1     115.520  67.726  12.867  1.00  0.00           H  
HETATM 2847  H1  MI1 A   1     113.613  64.484   7.973  1.00  0.00           H  
HETATM 2848  H2  MI1 A   1     111.966  65.814  11.597  1.00  0.00           H  
HETATM 2849  N1  UNK     1     111.128  64.488  10.147  1.00  0.00           N  
HETATM 2850  N2  UNK     1     111.637  64.085   8.976  1.00  0.00           N  
HETATM 2851  C1  UNK     1     110.893  63.144   8.131  1.00  0.00           C  
HETATM 2852  C2  UNK     1     109.356  63.376   8.154  1.00  0.00           C  
HETATM 2853  C3  UNK     1     108.534  62.255   7.489  1.00  0.00           C  
HETATM 2854  C4  UNK     1     107.022  62.433   7.738  1.00  0.00           C  
HETATM 2855  C5  UNK     1     106.166  61.239   7.275  1.00  0.00           C  
HETATM 2856  C6  UNK     1     104.663  61.434   7.587  1.00  0.00           C  
HETATM 2857  C7  UNK     1     103.821  60.154   7.439  1.00  0.00           C  
HETATM 2858  O1  UNK     1     103.712  59.629   6.322  1.00  0.00           O  
HETATM 2859  N3  UNK     1     103.228  59.700   8.570  1.00  0.00           N  
HETATM 2860  O2  UNK     1     102.429  58.623   8.718  1.00  0.00           O1-
HETATM 2861  H1  UNK     1     103.419  60.253   9.395  1.00  0.00           H  
HETATM 2862  H2  UNK     1     111.110  62.124   8.447  1.00  0.00           H  
HETATM 2863  H3  UNK     1     111.254  63.217   7.105  1.00  0.00           H  
HETATM 2864  H4  UNK     1     109.127  64.326   7.673  1.00  0.00           H  
HETATM 2865  H5  UNK     1     109.026  63.502   9.185  1.00  0.00           H  
HETATM 2866  H6  UNK     1     108.855  61.289   7.880  1.00  0.00           H  
HETATM 2867  H7  UNK     1     108.728  62.252   6.417  1.00  0.00           H  
HETATM 2868  H8  UNK     1     106.678  63.339   7.240  1.00  0.00           H  
HETATM 2869  H9  UNK     1     106.849  62.612   8.799  1.00  0.00           H  
HETATM 2870  H10 UNK     1     106.521  60.329   7.758  1.00  0.00           H  
HETATM 2871  H11 UNK     1     106.297  61.094   6.203  1.00  0.00           H  
HETATM 2872  H12 UNK     1     104.256  62.211   6.939  1.00  0.00           H  
HETATM 2873  H13 UNK     1     104.551  61.825   8.599  1.00  0.00           H  
CONECT  481  489  490
CONECT  783  791  792
CONECT 1621 1613 1622 1637
CONECT 1622 1621 1623 1625
CONECT 1623 1622 1624 1638
CONECT 1623 1624
CONECT 1624 1623
CONECT 1624 1623
CONECT 1625 1622 1626
CONECT 1626 1625 1627 1628
CONECT 1626 1627
CONECT 1627 1626 1629
CONECT 1627 1626
CONECT 1628 1626 1630
CONECT 1628 1630
CONECT 1629 1627 1631
CONECT 1629 1631
CONECT 1630 1628 1631
CONECT 1630 1628
CONECT 1631 1629 1630 1632
CONECT 1631 1629
CONECT 1632 1631 1633
CONECT 1633 1632 1634 1635 1636
CONECT 1633 1634
CONECT 1634 1633
CONECT 1634 1633
CONECT 1635 1633
CONECT 1636 1633
CONECT 1638 1623 1639 1654
CONECT 1639 1638 1640 1642
CONECT 1640 1639 1641 1655
CONECT 1640 1641
CONECT 1641 1640
CONECT 1641 1640
CONECT 1642 1639 1643
CONECT 1643 1642 1644 1645
CONECT 1643 1644
CONECT 1644 1643 1646
CONECT 1644 1643
CONECT 1645 1643 1647
CONECT 1645 1647
CONECT 1646 1644 1648
CONECT 1646 1648
CONECT 1647 1645 1648
CONECT 1647 1645
CONECT 1648 1646 1647 1649
CONECT 1648 1646
CONECT 1649 1648 1650
CONECT 1650 1649 1651 1652 1653
CONECT 1650 1651
CONECT 1651 1650
CONECT 1651 1650
CONECT 1652 1650
CONECT 1653 1650
CONECT 2822 2823 2824
CONECT 2825 2826 2827
CONECT 2828 2829 2830
CONECT  489  481
CONECT  490  481
CONECT  791  783
CONECT  792  783
CONECT 1637 1621
CONECT 1654 1638
CONECT 2823 2822
CONECT 2824 2822
CONECT 2826 2825
CONECT 2827 2825
CONECT 2829 2828
CONECT 2830 2828
CONECT 2831 2832 2839 2840
CONECT 2831 2839
CONECT 2832 2831 2833 2836
CONECT 2832 2836
CONECT 2833 2832 2834 2844
CONECT 2833 2834
CONECT 2834 2833 2835 2845
CONECT 2834 2833
CONECT 2835 2834 2836 2843
CONECT 2836 2832 2835 2837
CONECT 2836 2832
CONECT 2837 2836 2838
CONECT 2837 2838
CONECT 2838 2837 2839 2846
CONECT 2838 2837
CONECT 2839 2831 2838
CONECT 2839 2831
CONECT 2843 2835
CONECT 2840 2831 2841 2842
CONECT 2840 2841
CONECT 2841 2840 2850 2847
CONECT 2841 2840
CONECT 2842 2840 2849 2848
CONECT 2842 2849
CONECT 2849 2842 2850
CONECT 2849 2842
CONECT 2850 2841 2849 2851
CONECT 2851 2850 2852 2862 2863
CONECT 2852 2851 2853 2864 2865
CONECT 2853 2852 2854 2866 2867
CONECT 2854 2853 2855 2868 2869
CONECT 2855 2854 2856 2870 2871
CONECT 2856 2855 2857 2872 2873
CONECT 2857 2856 2858 2859
CONECT 2857 2858
CONECT 2858 2857
CONECT 2858 2857
CONECT 2859 2857 2861 2860
CONECT 2861 2859
CONECT 2860 2859
CONECT 2844 2833
CONECT 2845 2834
CONECT 2846 2838
CONECT 2847 2841
CONECT 2848 2842
CONECT 2862 2851
CONECT 2863 2851
CONECT 2864 2852
CONECT 2865 2852
CONECT 2866 2853
CONECT 2867 2853
CONECT 2868 2854
CONECT 2869 2854
CONECT 2870 2855
CONECT 2871 2855
CONECT 2872 2856
CONECT 2873 2856
ENDMDL
END   
